# Supplementary material for: Metabolomics‐based identification of metabolic alterations in PARK2
Source: PubMed Central journal article supplement — Ann Clin Transl Neurol. 2019 Feb 21;6(3):525–36. doi: 10.1002/acn3.724 (PMC6414487; doi:10.1002/acn3.724), 2019-02-21
Supplement: ACN3-6-525-s002.pdf [file ACN3-6-525-s002.pdf]

## Markers of PARK2, Human Serum

**Heat map of statistically significant biochemicals profiled in this study.** Red and green shaded cells indicate p<0.05 (red indicates that the mean values are significantly higher for that comparison; green values significantly lower). Light red and light green shaded cells indicate 0.05<p<0.10 (light red indicates that the mean values trend higher for that comparison; light green values trend lower).

| Pathway Sort Order | Super Pathway                            | Sub Pathway                        | Biochemical Name         | Platform        | Comp ID   | KEGG      | HMDB      | PUBCHEM | FOLD          | Welch's Two-Sample t-Test |         | Average |        |                   |                              |
|--------------------|------------------------------------------|------------------------------------|--------------------------|-----------------|-----------|-----------|-----------|---------|---------------|---------------------------|---------|---------|--------|-------------------|------------------------------|
|                    |                                          |                                    |                          |                 |           |           |           |         | PARK2/CONTROL | PARK2 VS/Control          |         | CONTROL | PARK2  | PARKIN HOMOZYGOUS | PARKIN COMPOUND HETEROZYGOUS |
|                    |                                          |                                    |                          |                 |           |           |           |         |               | p-value                   | q-value |         |        |                   |                              |
| 1                  | Glycine, Serine and Threonine Metabolism | glycine                            | LC/MS pos early          | 58              | C00037    | HMDB00123 | 750       | 1.09    | 0.2101        | 0.3810                    | 1.0148  | 1.1016  | 1.0888 | 1.0782            |                              |
| 2                  |                                          | N-acetylglycine                    | LC/MS neg                | 27710           |           | HMDB00532 | 10972     | 1.89    | 0.0346        | 0.1682                    | 1.0057  | 1.8019  | 1.7693 | 1.6861            |                              |
| 4                  |                                          | sarcosine                          | LC/MS pos early          | 1516            | C00213    | HMDB00271 | 1088      | 1.06    | 0.4713        | 0.5067                    | 1.0141  | 1.0739  | 1.0362 | 1.1088            |                              |
| 5                  |                                          | dimethylglycine                    | LC/MS pos early          | 5086            | C01026    | HMDB00092 | 673       | 1.20    | 0.1260        | 0.3126                    | 0.9950  | 1.1909  | 1.1643 | 1.1540            |                              |
| 6                  |                                          | betaine                            | LC/MS pos early          | 3141            | C00719    | HMDB00043 | 247       | 0.95    | 0.4785        | 0.5112                    | 1.0023  | 0.9561  | 0.9624 | 0.9606            |                              |
| 9                  |                                          | serine                             | LC/MS pos early          | 1648            | C00065    | HMDB00187 | 5951      | 0.99    | 0.8317        | 0.6058                    | 1.0174  | 1.0073  | 1.0102 | 1.0275            |                              |
| 10                 |                                          | N-acetylserine                     | LC/MS polar              | 37076           |           | HMDB02931 | 65249     | 1.06    | 0.4482        | 0.5011                    | 1.1016  | 1.1639  | 1.1220 | 1.0965            |                              |
| 16                 |                                          | threonine                          | LC/MS pos early          | 1284            | C00188    | HMDB00167 | 6288      | 0.82    | 0.0032        | 0.0608                    | 1.1041  | 0.9104  | 0.9860 | 0.9010            |                              |
| 17                 |                                          | N-acetylthreonine                  | LC/MS neg                | 33939           |           | HMDB62557 | 152204    | 0.99    | 0.9895        | 0.6494                    | 1.1259  | 1.1144  | 1.0960 | 0.9868            |                              |
| 22                 |                                          | O-acetylhomoserine                 | LC/MS polar              | 31539           | C01077    |           | 439389    | 2.95    | 0.8059        | 0.5637                    | 1.1383  | 3.3620  | 2.9187 | 5.1537            |                              |
| 28                 |                                          | Alanine and Aspartate Metabolism   | alanine                  | LC/MS pos early | 1126      | C00041    | HMDB00161 | 5950    | 0.89          | 0.0103                    | 0.0987  | 1.0577  | 0.9368 | 0.9431            | 0.9399                       |
| 30                 |                                          |                                    | N-acetylalanine          | LC/MS neg       | 1585      | C02847    | HMDB00766 | 88084   | 0.99          | 0.8860                    | 0.6244  | 1.1131  | 1.1068 | 1.0659            | 0.9996                       |
| 34                 |                                          |                                    | aspartate                | LC/MS pos early | 443       | C00049    | HMDB00191 | 5960    | 1.08          | 0.3272                    | 0.4524  | 1.0078  | 1.0881 | 1.0548            | 1.1524                       |
| 35                 |                                          |                                    | N-acetyl-aspartate (NAA) | LC/MS pos early | 22185     | C01042    | HMDB00812 | 65085   | 1.04          | 0.5417                    | 0.5395  | 0.9844  | 1.0286 | 1.0382            | 0.9197                       |
| 38                 |                                          |                                    | asparagine               | LC/MS pos early | 512       | C00152    | HMDB00168 | 6267    | 0.90          | 0.0008                    | 0.0257  | 1.0280  | 0.9203 | 0.9451            | 0.8923                       |
| 39                 |                                          |                                    | N-acetyl-asparagine      | LC/MS pos early | 33942     |           | HMDB06028 | 99715   | 1.19          | 0.2452                    | 0.4129  | 1.0067  | 1.1994 | 1.2091            | 0.9117                       |
| 41                 |                                          |                                    | glutamate                | LC/MS pos early | 57        | C00025    | HMDB00148 | 611     | 1.15          | 0.4638                    | 0.5047  | 0.9836  | 1.1297 | 1.1178            | 1.1458                       |
| 42                 | glutamine                                | LC/MS pos early                    | 53                       | C00064          | HMDB00641 | 5961      | 0.97      | 0.4581  | 0.5037        | 1.0063                    | 0.9785  | 0.9900  | 0.9428 |                   |                              |
| 44                 | Glutamate Metabolism                     | N-acetylglutamate                  | LC/MS polar              | 15720           | C00624    | HMDB01138 | 70914     | 1.03    | 0.6608        | 0.5708                    | 1.0860  | 1.1187  | 1.0537 | 1.0532            |                              |
| 45                 |                                          | N-acetylglutamine                  | LC/MS polar              | 33943           | C02716    | HMDB06029 | 182230    | 1.12    | 0.1945        | 0.3668                    | 0.9901  | 1.1095  | 1.0818 | 1.0845            |                              |
| 47                 |                                          | 4-hydroxyglutamate                 | LC/MS pos early          | 40499           | C03079    | HMDB01344 | 439902    | 1.38    | 0.2543        | 0.4195                    | 0.8581  | 1.1823  | 1.1024 | 1.1961            |                              |
| 51                 |                                          | pyroglutamine*                     | LC/MS pos early          | 46225           |           |           | 134508    | 0.72    | 0.2143        | 0.3810                    | 1.6689  | 1.2059  | 1.1857 | 1.3491            |                              |
| 52                 |                                          | N-acetyl-aspartyl-glutamate (NAAG) | LC/MS pos early          | 36665           | C12270    | HMDB01067 | 5255      | 0.99    | 0.9834        | 0.6466                    | 1.0958  | 1.0823  | 1.0382 | 1.0913            |                              |
| 53                 |                                          | beta-citrylglutamate               | LC/MS neg                | 54923           | C20775    |           | 72715786  | 1.25    | 0.0736        | 0.2516                    | 0.9616  | 1.1986  | 1.1534 | 1.1192            |                              |
| 59                 |                                          | S-1-pyrroline-5-carboxylate        | LC/MS pos early          | 42370           | C04322    | HMDB01301 | 1196      | 0.78    | 0.1422        | 0.3340                    | 1.2077  | 0.9440  | 0.8935 | 0.7362            |                              |
| 65                 | Histidine Metabolism                     | histidine                          | LC/MS neg                | 59              | C00135    | HMDB00177 | 6274      | 0.93    | 0.1157        | 0.3004                    | 1.0037  | 0.9376  | 0.9555 | 0.8943            |                              |
| 66                 |                                          | 1-methylhistidine                  | LC/MS pos early          | 30460           | C01152    | HMDB00001 | 92105     | 0.90    | 0.4071        | 0.4827                    | 1.1609  | 1.0458  | 1.0252 | 1.0303            |                              |
| 67                 |                                          | 3-methylhistidine                  | LC/MS neg                | 15677           | C01152    | HMDB00479 | 64989     | 0.51    | 0.0289        | 0.1494                    | 2.0985  | 1.0681  | 1.0002 | 0.8089            |                              |
| 68                 |                                          | N-acetylhistidine                  | LC/MS neg                | 33946           | C02997    | HMDB32055 | 75619     | 1.00    | 0.8021        | 0.6038                    | 1.0433  | 1.0476  | 1.0282 | 0.8953            |                              |
| 70                 |                                          | N-acetyl-1-methylhistidine*        | LC/MS pos early          | 43255           |           |           | 193270    | 0.86    | 0.5030        | 0.5206                    | 1.2142  | 1.0424  | 1.0682 | 0.7952            |                              |
| 71                 |                                          | hydantoin-5-proprionate            | LC/MS polar              | 40473           | C05565    | HMDB01212 | 782       | 1.00    | 0.8168        | 0.6058                    | 1.0317  | 1.0272  | 1.0246 | 1.0275            |                              |
| 72                 |                                          | trans-urocanate                    | LC/MS pos early          | 607             | C00785    | HMDB00301 | 736715    | 1.46    | 0.0287        | 0.1494                    | 0.9008  | 1.3158  | 1.3220 | 1.2135            |                              |
| 74                 |                                          | imidazole propanoate               | LC/MS pos early          | 40730           |           | HMDB02271 | 70630     | 1.72    | 0.1685        | 0.3488                    | 1.0718  | 1.8480  | 1.7774 | 2.3763            |                              |
| 76                 |                                          | imidazole lactate                  | LC/MS pos early          | 15716           | C05568    | HMDB02320 | 440129    | 1.07    | 0.7665        | 0.5982                    | 1.0768  | 1.1487  | 1.0945 | 1.1060            |                              |
| 79                 |                                          | N-acetylcarnosine                  | LC/MS pos early          | 43488           |           | HMDB12881 | 9903482   | 0.60    | 0.0253        | 0.1424                    | 1.6629  | 0.9971  | 1.0075 | 1.0518            |                              |
| 82                 |                                          | 1-methylhistamine                  | LC/MS pos early          | 43631           | C05127    | HMDB00898 | 3614      | 1.64    | 0.6760        | 0.5750                    | 1.1289  | 1.8556  | 1.7987 | 1.4928            |                              |
| 83                 |                                          | 1-methyl-4-imidazoleacetate        | LC/MS pos early          | 32350           | C05828    | HMDB02820 | 75810     | 0.80    | 0.3412        | 0.4524                    | 1.4795  | 1.1887  | 1.1818 | 1.2662            |                              |
| 86                 |                                          | 4-imidazoleacetate                 | LC/MS pos early          | 32349           | C02835    | HMDB02024 | 96215     | 1.05    | 0.6796        | 0.6207                    | 1.0527  | 1.1010  | 1.0981 | 1.1816            |                              |
| 90                 |                                          | N-acetylhistamine                  | LC/MS pos early          | 48679           | C05135    | HMDB13253 | 69602     | 0.56    | 0.7941        | 0.6033                    | 1.4657  | 0.8169  | 1.1336 | 1.1029            |                              |
| 93                 | Lysine Metabolism                        | lysine                             | LC/MS pos early          | 1301            | C00047    | HMDB00182 | 5962      | 0.89    | 0.0216        | 0.1290                    | 1.0460  | 0.9302  | 0.9693 | 0.8863            |                              |
| 94                 |                                          | N2-acetyllysine                    | LC/MS polar              | 36751           | C12989    | HMDB00446 | 92907     | 0.82    | 0.6602        | 0.5708                    | 0.9854  | 0.8080  | 0.8484 | 0.7290            |                              |
| 95                 |                                          | N6-acetyllysine                    | LC/MS neg                | 36752           | C02727    | HMDB00206 | 92832     | 0.89    | 0.2962        | 0.4397                    | 1.1296  | 1.0064  | 0.9904 | 0.9646            |                              |
| 103                |                                          | N6,N6,N6-trimethyllysine           | LC/MS pos early          | 1498            | C03793    | HMDB01325 | 440120    | 0.85    | 0.2583        | 0.4196                    | 1.1826  | 1.0039  | 0.9916 | 0.9846            |                              |
| 105                |                                          | 5-hydroxylysine                    | LC/MS pos early          | 15885           | C16741    | HMDB00450 | 1029      | 0.90    | 0.7775        | 0.5998                    | 1.2985  | 1.1675  | 1.1445 | 1.1811            |                              |
| 106                |                                          | 5-(galactosylhydroxy)-L-lysine     | LC/MS pos early          | 43582           |           |           |           | 0.87    | 0.6485        | 0.5690                    | 1.1986  | 1.0479  | 1.0246 | 0.9803            |                              |
| 108                |                                          | 2-aminoadipate                     | LC/MS polar              | 6146            | C00956    | HMDB00510 | 469       | 0.97    | 0.8261        | 0.6058                    | 1.1304  | 1.0939  | 1.0878 | 1.0472            |                              |
| 112                |                                          | glutarylcarritine (C5-DC)          | LC/MS pos early          | 44664           |           | HMDB13130 | 71464488  | 0.96    | 0.5513        | 0.5433                    | 1.0810  | 1.0328  | 0.9821 | 0.8933            |                              |

|     |                                    |                               |                 |                        |                           |                           |         |        |        |        |         |         |         |        |
|-----|------------------------------------|-------------------------------|-----------------|------------------------|---------------------------|---------------------------|---------|--------|--------|--------|---------|---------|---------|--------|
| 116 |                                    | ipicolate                     | LC/MS pos early | 1444                   | <a href="#">C00408</a>    | <a href="#">HMDB00070</a> | 849     | 0.75   | 0.1340 | 0.3227 | 1.2388  | 0.9334  | 0.9329  | 1.0091 |
| 117 |                                    | 9-oxopiperidine-2-carboxylate | LC/MS neg       | 43231                  |                           | <a href="#">HMDB61705</a> | 3014237 | 1.18   | 0.2067 | 0.3790 | 0.9352  | 1.0991  | 1.0592  | 1.0471 |
| 119 |                                    | N-acetyl-cadaverine           | LC/MS pos early | 43530                  |                           | <a href="#">HMDB02284</a> | 189097  | 1.75   | 0.0060 | 0.0791 | 1.2355  | 2.1607  | 2.3963  | 2.3255 |
| 123 |                                    | phenylalanine                 | LC/MS pos early | 64                     | <a href="#">C00079</a>    | <a href="#">HMDB00159</a> | 6140    | 0.95   | 0.2040 | 0.3788 | 1.0073  | 0.9619  | 0.9668  | 0.9414 |
| 124 | Phenylalanine Metabolism           | N-acetylphenylalanine         | LC/MS neg       | 33950                  | <a href="#">C03519</a>    | <a href="#">HMDB00512</a> | 74839   | 0.78   | 0.0435 | 0.1842 | 1.1883  | 0.9287  | 0.9373  | 0.8153 |
| 128 |                                    | phenylpyruvate                | LC/MS neg       | 566                    | <a href="#">C00166</a>    | <a href="#">HMDB00205</a> | 997     | 1.08   | 0.2821 | 0.4196 | 0.9906  | 1.0889  | 1.0617  | 1.0682 |
| 129 |                                    | phenyllactate (PLA)           | LC/MS neg       | 22130                  | <a href="#">C05607</a>    | <a href="#">HMDB00779</a> | 3848    | 1.08   | 0.8349 | 0.5662 | 0.9971  | 1.0801  | 1.0448  | 1.0244 |
| 134 |                                    | 2-hydroxyphenylacetate        | LC/MS polar     | 1432                   | <a href="#">C05852</a>    | <a href="#">HMDB00669</a> | 11970   | 0.83   | 0.2646 | 0.4204 | 1.1967  | 0.9981  | 0.9280  | 0.8475 |
| 140 |                                    | tyrosine                      | LC/MS pos early | 1299                   | <a href="#">C00082</a>    | <a href="#">HMDB00158</a> | 6057    | 0.97   | 0.5374 | 0.5363 | 1.0389  | 1.0120  | 1.0264  | 0.9692 |
| 141 |                                    | N-acetyltyrosine              | LC/MS neg       | 32390                  |                           | <a href="#">HMDB00866</a> | 68310   | 0.82   | 0.1388 | 0.3283 | 1.1680  | 0.9559  | 0.9871  | 0.8023 |
| 150 | 4-hydroxyphenylpyruvate            | LC/MS neg                     | 1669            | <a href="#">C01179</a> | <a href="#">HMDB00707</a> | 979                       | 0.76    | 0.0613 | 0.2255 | 1.1634 | 0.8870  | 0.9186  | 0.9575  |        |
| 153 | 3-(4-hydroxyphenyl)lactate         | LC/MS neg                     | 32197           | <a href="#">C03672</a> | <a href="#">HMDB00755</a> | 9378                      | 0.95    | 0.6410 | 0.5662 | 1.1113 | 1.0534  | 1.0366  | 0.9989  |        |
| 157 | phenol sulfate                     | LC/MS neg                     | 32553           | <a href="#">C02180</a> | <a href="#">HMDB00015</a> | 74426                     | 1.27    | 0.9902 | 0.6494 | 1.3154 | 1.6677  | 1.6021  | 1.7804  |        |
| 168 | vanillylactate                     | LC/MS neg                     | 54910           |                        | <a href="#">HMDB00913</a> | 160637                    | 118.98  | 0.0000 | 0.0003 | 0.2790 | 33.1894 | 30.2507 | 32.7776 |        |
| 169 | vanillylmandelate (VMA)            | LC/MS neg                     | 1567            | <a href="#">C05584</a> | <a href="#">HMDB00291</a> | 1245                      | 1.63    | 0.0133 | 0.1065 | 0.8992 | 1.3733  | 1.3256  | 1.1945  |        |
| 171 | 3-methoxytyrosine                  | LC/MS pos early               | 12017           |                        | <a href="#">HMDB01434</a> | 1670                      | 115.98  | 0.0000 | 0.0003 | 0.7531 | 87.3465 | 85.5326 | 82.1415 |        |
| 173 | 3-methoxytyramine sulfate          | LC/MS neg                     | 44618           |                        |                           |                           | 78.90   | 0.0000 | 0.0003 | 0.0591 | 4.5448  | 4.1318  | 3.6697  |        |
| 177 | homovanillate (HVA)                | LC/MS neg                     | 1101            | <a href="#">C05582</a> | <a href="#">HMDB00118</a> | 1738                      | 11.28   | 0.0000 | 0.0006 | 0.3803 | 4.2903  | 4.0394  | 3.6026  |        |
| 186 | gentisate                          | LC/MS polar                   | 16280           | <a href="#">C00628</a> | <a href="#">HMDB00152</a> | 3469                      | 0.83    | 0.3396 | 0.4524 | 1.3690 | 1.1297  | 1.1257  | 1.2234  |        |
| 188 | homovanillate sulfate              | LC/MS neg                     | 38349           |                        | <a href="#">HMDB11719</a> | 2981063                   | 11.70   | 0.0000 | 0.0018 | 0.1070 | 1.2517  | 1.1628  | 0.7991  |        |
| 190 | dopamine 4-sulfate                 | LC/MS neg                     | 48406           | <a href="#">C13691</a> | <a href="#">HMDB04148</a> | 123932                    | 42.28   | 0.0000 | 0.0016 | 0.2425 | 10.2523 | 11.0740 | 8.8312  |        |
| 191 | dopamine 3-O-sulfate               | LC/MS neg                     | 48407           | <a href="#">C13690</a> | <a href="#">HMDB06275</a> | 122136                    | 34.41   | 0.0000 | 0.0009 | 0.7231 | 24.8826 | 26.3540 | 20.5519 |        |
| 192 | p-cresol glucuronide*              | LC/MS neg                     | 48841           |                        | <a href="#">HMDB11686</a> | 154035                    | 0.50    | 0.7043 | 0.5845 | 4.4416 | 2.2379  | 2.0584  | 2.2994  |        |
| 193 | tyramine O-sulfate                 | LC/MS neg                     | 48408           |                        | <a href="#">HMDB06409</a> | 153005                    | 0.67    | 0.3237 | 0.4524 | 2.3289 | 1.5513  | 1.6886  | 1.5734  |        |
| 194 | N-formylphenylalanine              | LC/MS neg                     | 48433           |                        |                           | 750256                    | 1.10    | 0.6441 | 0.5679 | 1.0223 | 1.1253  | 1.0438  | 1.0042  |        |
| 198 | 3,4-dihydroxyphenylacetate sulfate | LC/MS neg                     | 48736           |                        |                           | 193283                    | 10.88   | 0.0000 | 0.0017 | 0.1834 | 2.0144  | 2.3748  | 1.2295  |        |
| 209 | tyroxine                           | LC/MS neg                     | 2761            | <a href="#">C01829</a> | <a href="#">HMDB01918</a> | 5819                      | 1.17    | 0.1692 | 0.3488 | 0.9952 | 1.1648  | 1.0920  | 1.1068  |        |
| 213 | tryptophan                         | LC/MS pos early               | 54              | <a href="#">C00078</a> | <a href="#">HMDB00929</a> | 6305                      | 0.95    | 0.3655 | 0.4613 | 0.9966 | 0.9442  | 0.9466  | 0.9185  |        |
| 214 | N-acetyltryptophan                 | LC/MS neg                     | 33959           | <a href="#">C03137</a> | <a href="#">HMDB13713</a> | 700653                    | 0.70    | 0.0899 | 0.2674 | 1.2921 | 0.9093  | 0.9358  | 0.7593  |        |
| 220 | C-glycosyltryptophan               | LC/MS pos early               | 48782           |                        |                           | 10981970                  | 1.15    | 0.1300 | 0.3183 | 1.0531 | 1.2058  | 1.1801  | 1.1439  |        |
| 222 | tryptophan betaine                 | LC/MS pos early               | 37097           | <a href="#">C09213</a> | <a href="#">HMDB61115</a> | 442106                    | 0.90    | 0.1622 | 0.3488 | 4.2213 | 3.8126  | 3.7034  | 3.2935  |        |
| 224 | kyrurine                           | LC/MS pos early               | 15140           | <a href="#">C00328</a> | <a href="#">HMDB00684</a> | 161166                    | 1.00    | 0.8749 | 0.6198 | 1.0576 | 1.0623  | 1.0551  | 1.0126  |        |
| 226 | N-acetylkyrurine (2)               | LC/MS neg                     | 48757           |                        |                           |                           | 0.51    | 0.0526 | 0.2051 | 1.2680 | 0.6412  | 0.6506  | 0.4933  |        |
| 228 | kyrurate                           | LC/MS neg                     | 1417            | <a href="#">C01717</a> | <a href="#">HMDB00715</a> | 3845                      | 0.83    | 0.1543 | 0.3451 | 1.1075 | 0.9137  | 0.8905  | 0.7598  |        |
| 230 | N-formylanthranilic acid           | LC/MS polar                   | 43549           | <a href="#">C05653</a> | <a href="#">HMDB04089</a> | 101399                    | 1.16    | 0.5575 | 0.5461 | 0.9397 | 1.0917  | 1.1051  | 1.2841  |        |
| 234 | xanthurate                         | LC/MS neg                     | 15679           | <a href="#">C02470</a> | <a href="#">HMDB00881</a> | 5699                      | 0.78    | 0.3836 | 0.4739 | 1.3123 | 1.0224  | 1.0168  | 0.8750  |        |
| 236 | picolinate                         | LC/MS pos early               | 1512            | <a href="#">C10164</a> | <a href="#">HMDB02243</a> | 1018                      | 1.06    | 0.8346 | 0.6058 | 1.0412 | 1.0998  | 1.2227  | 1.2582  |        |
| 237 | serotonin                          | LC/MS pos early               | 2342            | <a href="#">C00780</a> | <a href="#">HMDB00259</a> | 5202                      | 0.81    | 0.2619 | 0.4190 | 1.1210 | 0.9085  | 0.9501  | 0.9412  |        |
| 240 | 5-hydroxyindoleacetate             | LC/MS neg                     | 437             | <a href="#">C05635</a> | <a href="#">HMDB00763</a> | 1826                      | 0.96    | 0.7754 | 0.5998 | 0.9717 | 0.9374  | 0.9478  | 1.0771  |        |
| 244 | indolylactate                      | LC/MS pos early               | 18349           | <a href="#">C02043</a> | <a href="#">HMDB00671</a> | 92904                     | 0.83    | 0.3907 | 0.4792 | 1.2409 | 1.0315  | 1.0276  | 1.0067  |        |
| 245 | indoleacetate                      | LC/MS pos early               | 27513           | <a href="#">C00954</a> | <a href="#">HMDB00197</a> | 802                       | 0.82    | 0.0258 | 0.1424 | 1.3442 | 1.1068  | 1.0209  | 1.4420  |        |
| 248 | indolepropionate                   | LC/MS pos early               | 32405           |                        | <a href="#">HMDB02302</a> | 3744                      | 0.79    | 0.1670 | 0.3668 | 1.3590 | 1.0786  | 0.9675  | 0.9408  |        |
| 250 | indoleacetylglutamine              | LC/MS neg                     | 42067           |                        | <a href="#">HMDB13240</a> | 25200879                  | 0.53    | 0.0377 | 0.1721 | 1.5894 | 0.8370  | 0.7650  | 0.8422  |        |
| 253 | indole-3-carboxylate               | LC/MS neg                     | 38116           | <a href="#">C19837</a> | <a href="#">HMDB03320</a> | 69867                     | 1.01    | 0.7811 | 0.5968 | 1.2288 | 1.2423  | 1.1946  | 1.1999  |        |
| 258 | 3-indoxyl sulfate                  | LC/MS neg                     | 27672           |                        | <a href="#">HMDB00682</a> | 10256                     | 0.89    | 0.6655 | 0.5722 | 1.1151 | 0.9932  | 0.9853  | 1.0539  |        |
| 261 | 5-bromotryptophan                  | LC/MS neg                     | 53242           |                        |                           | 96735                     | 0.89    | 0.1994 | 0.3735 | 1.0340 | 0.9198  | 0.9359  | 0.9324  |        |
| 265 | leucine                            | LC/MS pos early               | 60              | <a href="#">C00123</a> | <a href="#">HMDB00687</a> | 6106                      | 0.93    | 0.3027 | 0.4444 | 1.0957 | 1.0234  | 1.0383  | 1.0233  |        |
| 266 | N-acetylleucine                    | LC/MS neg                     | 1587            | <a href="#">C02710</a> | <a href="#">HMDB11756</a> | 70912                     | 1.01    | 0.9707 | 0.6446 | 1.0750 | 1.0895  | 1.0632  | 1.0746  |        |
| 269 | 4-methyl-2-oxopentanoate           | LC/MS neg                     | 22116           | <a href="#">C00233</a> | <a href="#">HMDB00695</a> | 70                        | 1.16    | 0.3002 | 0.4418 | 1.0093 | 1.1692  | 1.1703  | 1.2447  |        |
| 272 | alpha-hydroxyisocaproate           | LC/MS neg                     | 22132           | <a href="#">C03264</a> | <a href="#">HMDB00746</a> | 83697                     | 1.21    | 0.1498 | 0.3419 | 0.9779 | 1.1825  | 1.1866  | 1.2329  |        |
| 275 | isovalerate (5:0)                  | LC/MS neg                     | 44656           | <a href="#">C08262</a> | <a href="#">HMDB00718</a> | 10430                     | 1.36    | 0.0373 | 0.1717 | 0.8840 | 1.2001  | 1.1534  | 1.0073  |        |
| 276 | isovalerylglycine                  | LC/MS neg                     | 35107           |                        | <a href="#">HMDB00678</a> | 546304                    | 0.83    | 0.8316 | 0.6058 | 1.2455 | 1.0398  | 1.0723  | 0.8420  |        |
| 277 | isovalerylcarnitine (C5)           | LC/MS pos early               | 34407           |                        | <a href="#">HMDB00688</a> | 6428851                   | 1.01    | 0.7862 | 0.6012 | 1.0873 | 1.0930  | 1.0773  | 1.1758  |        |
| 284 | beta-hydroxyisovalerate            | LC/MS neg                     | 12129           |                        | <a href="#">HMDB00754</a> | 69362                     | 1.22    | 0.1170 | 0.3010 | 1.0538 | 1.2843  | 1.2015  | 1.4015  |        |

Amino Acid

|     |                                                  |                                |                 |       |                        |                           |          |      |        |        |        |        |        |        |
|-----|--------------------------------------------------|--------------------------------|-----------------|-------|------------------------|---------------------------|----------|------|--------|--------|--------|--------|--------|--------|
| 287 |                                                  | 3-methylglutaconate            | LC/MS polar     | 38667 |                        | <a href="#">HMDB00522</a> | 1551563  | 0.74 | 0.3311 | 0.4524 | 1.4559 | 1.0762 | 1.0469 | 0.7642 |
| 291 |                                                  | 3-methylglutaryl carnitine (2) | LC/MS pos early | 46548 |                        | <a href="#">HMDB00552</a> | 128145   | 0.61 | 0.4453 | 0.4999 | 2.8089 | 1.7166 | 1.5664 | 1.0730 |
| 300 |                                                  | isoleucine                     | LC/MS pos early | 1125  | <a href="#">C00407</a> | <a href="#">HMDB00172</a> | 6306     | 0.95 | 0.4510 | 0.5022 | 1.1078 | 1.0564 | 1.0548 | 1.0650 |
| 302 |                                                  | N-acetyl isoleucine            | LC/MS neg       | 33967 |                        | <a href="#">HMDB01684</a> | 2802421  | 0.82 | 0.2860 | 0.4347 | 1.1843 | 0.9655 | 0.9438 | 1.0179 |
| 304 |                                                  | 3-methyl-2-oxovalerate         | LC/MS neg       | 15676 | <a href="#">C00671</a> | <a href="#">HMDB03736</a> | 47       | 1.18 | 0.2608 | 0.4196 | 1.0280 | 1.2126 | 1.1843 | 1.2958 |
| 305 | Leucine, Isoleucine and Valine Metabolism        | alpha-hydroxyisovalerate       | LC/MS neg       | 33937 |                        | <a href="#">HMDB00407</a> | 99823    | 1.20 | 0.1179 | 0.3018 | 1.0166 | 1.2177 | 1.1524 | 1.3858 |
| 307 |                                                  | 2-methylbutyryl carnitine (C5) | LC/MS pos early | 45095 |                        | <a href="#">HMDB00378</a> | 6426901  | 0.74 | 0.0568 | 0.2168 | 1.3573 | 1.0110 | 0.9907 | 1.0852 |
| 310 |                                                  | beta-carnitine (C5-1-DC)       | LC/MS pos early | 35428 |                        | <a href="#">HMDB02366</a> | 22833596 | 0.96 | 0.5516 | 0.5433 | 1.1447 | 1.0954 | 1.0849 | 1.0281 |
| 313 |                                                  | 3-hydroxy-2-ethylpropionate    | LC/MS polar     | 32387 |                        | <a href="#">HMDB00396</a> | 188979   | 1.09 | 0.5715 | 0.5478 | 1.0600 | 1.1542 | 1.1133 | 1.3281 |
| 315 |                                                  | ethylmalonate                  | LC/MS polar     | 15765 |                        | <a href="#">HMDB00622</a> | 11756    | 1.09 | 0.8218 | 0.6058 | 1.0719 | 1.1652 | 1.1219 | 1.3227 |
| 316 |                                                  | methylsuccinate                | LC/MS polar     | 15745 |                        | <a href="#">HMDB01844</a> | 10346    | 1.07 | 0.9252 | 0.6294 | 0.9946 | 1.0617 | 1.0438 | 1.1407 |
| 322 |                                                  | valine                         | LC/MS pos early | 1649  | <a href="#">C00183</a> | <a href="#">HMDB00883</a> | 6287     | 0.92 | 0.2252 | 0.3941 | 1.0791 | 0.9927 | 1.0015 | 0.9982 |
| 323 |                                                  | N-acetylvaline                 | LC/MS neg       | 1591  |                        | <a href="#">HMDB11757</a> | 66789    | 1.00 | 0.8132 | 0.6056 | 1.0844 | 1.0626 | 1.0542 | 1.0011 |
| 327 |                                                  | 3-methyl-2-oxobutyrate         | LC/MS neg       | 44526 | <a href="#">C00141</a> | <a href="#">HMDB00019</a> | 49       | 1.23 | 0.0464 | 0.1889 | 0.9959 | 1.2210 | 1.1964 | 1.2966 |
| 328 |                                                  | 2-hydroxy-3-methylvalerate     | LC/MS neg       | 36746 |                        | <a href="#">HMDB00317</a> | 164623   | 1.20 | 0.2469 | 0.4130 | 1.0939 | 1.3093 | 1.2418 | 1.5176 |
| 330 |                                                  | isobutyryl carnitine (C4)      | LC/MS pos early | 33441 |                        | <a href="#">HMDB00736</a> | 168379   | 0.85 | 0.6789 | 0.5765 | 1.3086 | 1.1123 | 1.1229 | 1.2104 |
| 331 |                                                  | isobutyrylglycine              | LC/MS neg       | 35437 |                        | <a href="#">HMDB00730</a> | 10855900 | 1.14 | 0.3539 | 0.4591 | 1.0492 | 1.1936 | 1.1728 | 0.9367 |
| 332 |                                                  | 3-hydroxyisobutyrate           | LC/MS polar     | 1549  | <a href="#">C06001</a> | <a href="#">HMDB00336</a> | 87       | 1.09 | 0.6213 | 0.5637 | 0.9338 | 1.0201 | 0.9956 | 1.1791 |
| 333 |                                                  | 2,3-dihydroxy-2-methylbutyrate | LC/MS polar     | 57547 |                        | <a href="#">HMDB29576</a> | 301941   | 0.50 | 0.3708 | 0.4613 | 1.1895 | 0.5939 | 0.5853 | 0.6543 |
| 336 |                                                  | methionine                     | LC/MS pos early | 1302  | <a href="#">C00073</a> | <a href="#">HMDB00696</a> | 6137     | 0.86 | 0.0217 | 0.1290 | 1.0726 | 0.9251 | 0.9438 | 0.8937 |
| 337 |                                                  | N-acetylmethionine             | LC/MS neg       | 1589  | <a href="#">C02712</a> | <a href="#">HMDB11745</a> | 448580   | 1.04 | 0.5964 | 0.5529 | 1.0059 | 1.0450 | 1.0048 | 0.9503 |
| 338 |                                                  | N-formylmethionine             | LC/MS neg       | 2829  | <a href="#">C03145</a> | <a href="#">HMDB01015</a> | 439750   | 0.95 | 0.5779 | 0.5498 | 1.0988 | 1.0406 | 1.0244 | 0.8676 |
| 339 |                                                  | S-methylmethionine             | LC/MS pos early | 38127 | <a href="#">C05319</a> | <a href="#">HMDB38670</a> | 458      | 1.01 | 0.3693 | 0.4613 | 1.2706 | 1.2871 | 1.3211 | 0.8432 |
| 340 |                                                  | methionine sulfone             | LC/MS pos early | 44878 |                        |                           | 69961    | 0.80 | 0.5114 | 0.5251 | 1.3836 | 1.1107 | 1.1362 | 1.0274 |
| 341 |                                                  | methionine sulfoxide           | LC/MS pos early | 18374 | <a href="#">C02989</a> | <a href="#">HMDB02005</a> | 158980   | 0.98 | 0.9075 | 0.6250 | 1.1562 | 1.1273 | 1.0953 | 0.9998 |
| 347 |                                                  | S-adenosylhomocysteine (SAH)   | LC/MS neg       | 42382 | <a href="#">C00021</a> | <a href="#">HMDB00939</a> | 439155   | 1.12 | 0.4209 | 0.4904 | 0.9510 | 1.0679 | 0.9842 | 0.8535 |
| 353 |                                                  | cystathionine                  | LC/MS pos early | 15705 | <a href="#">C02291</a> | <a href="#">HMDB00099</a> | 430258   | 0.73 | 0.6405 | 0.5962 | 1.5986 | 1.1635 | 1.1009 | 1.0789 |
| 355 |                                                  | cysteine                       | LC/MS pos early | 1868  | <a href="#">C00097</a> | <a href="#">HMDB00574</a> | 5862     | 0.95 | 0.8559 | 0.5708 | 1.1365 | 1.0789 | 1.1048 | 1.2045 |
| 357 | Methionine, Cysteine, SAM and Taurine Metabolism | S-methylcysteine               | LC/MS neg       | 36992 |                        | <a href="#">HMDB02108</a> | 24417    | 1.23 | 0.4379 | 0.4983 | 1.0179 | 1.2482 | 1.2392 | 1.0406 |
| 358 |                                                  | S-methylcysteine sulfoxide     | LC/MS pos early | 43378 |                        | <a href="#">HMDB29432</a> | 82142    | 1.14 | 0.8777 | 0.6207 | 1.1434 | 1.3016 | 1.4160 | 1.0502 |
| 360 |                                                  | cysteine s-sulfide             | LC/MS pos early | 22176 | <a href="#">C05824</a> | <a href="#">HMDB00731</a> | 115015   | 0.48 | 0.3539 | 0.4591 | 2.5437 | 1.2305 | 1.7309 | 1.4491 |
| 361 |                                                  | cystine                        | LC/MS pos early | 56    | <a href="#">C00491</a> | <a href="#">HMDB00192</a> | 67678    | 1.03 | 0.7655 | 0.5982 | 0.9784 | 1.0073 | 0.9906 | 0.9880 |
| 364 |                                                  | methionine                     | LC/MS pos early | 42002 |                        |                           | 98504    | 1.65 | 0.6944 | 0.5831 | 1.2968 | 2.1495 | 1.9399 | 1.3187 |
| 366 |                                                  | cysteine sulfonic acid         | LC/MS pos early | 37443 | <a href="#">C00606</a> | <a href="#">HMDB00996</a> | 109      | 1.18 | 0.1915 | 0.3668 | 0.9796 | 1.1527 | 1.1019 | 1.1297 |
| 367 |                                                  | hypotaurine                    | LC/MS pos early | 590   | <a href="#">C00519</a> | <a href="#">HMDB00965</a> | 107812   | 1.36 | 0.0856 | 0.2638 | 0.9548 | 1.3006 | 1.3176 | 1.3805 |
| 368 |                                                  | taurine                        | LC/MS neg       | 2125  | <a href="#">C00245</a> | <a href="#">HMDB00251</a> | 1123     | 1.16 | 0.2010 | 0.3751 | 0.9576 | 1.1106 | 1.0887 | 1.1063 |
| 369 |                                                  | N-acetyltaurine                | LC/MS neg       | 48187 |                        |                           | 159864   | 0.99 | 0.6501 | 0.5694 | 1.1188 | 1.1056 | 1.0589 | 1.0212 |
| 370 |                                                  | N-methyltaurine                | LC/MS polar     | 42989 |                        |                           | 7882     | 1.15 | 0.6139 | 0.5637 | 1.2774 | 1.4674 | 1.2463 | 1.1513 |
| 375 |                                                  | arginine                       | LC/MS pos early | 1638  | <a href="#">C00062</a> | <a href="#">HMDB00517</a> | 232      | 0.94 | 0.1929 | 0.3668 | 1.0255 | 0.9676 | 0.9756 | 0.9641 |
| 376 |                                                  | argininosuccinate              | LC/MS pos early | 15497 | <a href="#">C03406</a> | <a href="#">HMDB00052</a> | 828      | 1.08 | 0.9504 | 0.6381 | 0.7495 | 0.8114 | 0.8769 | 0.9108 |
| 377 |                                                  | urea                           | LC/MS pos early | 1670  | <a href="#">C00086</a> | <a href="#">HMDB00294</a> | 1176     | 1.15 | 0.1303 | 0.3183 | 1.0085 | 1.1648 | 1.1557 | 1.1844 |
| 379 |                                                  | ornithine                      | LC/MS pos early | 1493  | <a href="#">C00077</a> | <a href="#">HMDB03374</a> | 6262     | 1.02 | 0.6012 | 0.5629 | 1.0020 | 1.0256 | 1.0269 | 0.9749 |
| 383 |                                                  | 2-oxoarginine*                 | LC/MS pos early | 55072 | <a href="#">C03771</a> | <a href="#">HMDB04225</a> | 568      | 1.36 | 0.2663 | 0.4213 | 0.7457 | 1.0116 | 0.9645 | 0.7388 |
| 384 |                                                  | citrulline                     | LC/MS pos early | 2132  | <a href="#">C00327</a> | <a href="#">HMDB00904</a> | 9750     | 0.97 | 0.6072 | 0.5637 | 1.0331 | 1.0007 | 1.0212 | 0.9491 |
| 385 |                                                  | homocysteine                   | LC/MS pos early | 22137 | <a href="#">C01924</a> | <a href="#">HMDB00670</a> | 9085     | 0.72 | 0.0033 | 0.0608 | 1.1255 | 0.8114 | 0.8784 | 0.7070 |
| 386 |                                                  | homocitrulline                 | LC/MS pos early | 22138 | <a href="#">C02427</a> | <a href="#">HMDB00679</a> | 65072    | 0.83 | 0.9275 | 0.6301 | 1.4651 | 1.2108 | 1.1677 | 1.2813 |
| 387 |                                                  | proline                        | LC/MS pos early | 1898  | <a href="#">C00148</a> | <a href="#">HMDB00162</a> | 145742   | 1.18 | 0.5652 | 0.5475 | 1.0182 | 1.2025 | 1.1859 | 1.0126 |
| 390 | Urea cycle; Arginine and Proline Metabolism      | dimethylarginine (SDMA + ADMA) | LC/MS pos early | 36908 | <a href="#">C03626</a> | <a href="#">HMDB01539</a> | 123831   | 1.00 | 0.9965 | 0.6510 | 1.0584 | 1.0537 | 1.0602 | 1.0133 |
| 391 |                                                  | N-acetylarginine               | LC/MS pos early | 33953 | <a href="#">C02562</a> | <a href="#">HMDB04620</a> | 67427    | 1.07 | 0.3560 | 0.4591 | 0.9980 | 1.0709 | 1.0917 | 1.0230 |
| 394 |                                                  | N-acetylcitrulline             | LC/MS neg       | 48434 | <a href="#">C15532</a> | <a href="#">HMDB00856</a> | 656979   | 0.66 | 0.3760 | 0.4656 | 1.6672 | 1.0952 | 1.0985 | 0.7990 |
| 395 |                                                  | N-acetylproline                | LC/MS pos early | 34387 |                        |                           | 322640   | 1.36 | 0.1136 | 0.2966 | 1.1074 | 1.5048 | 1.4341 | 1.5239 |
| 396 |                                                  | N-delta-acetylornithine        | LC/MS neg       | 43249 |                        |                           | 9920500  | 0.87 | 0.3416 | 0.4524 | 1.2473 | 1.0835 | 1.0618 | 1.0323 |
| 397 |                                                  | N-alpha-acetylornithine        | LC/MS pos early | 32964 | <a href="#">C00437</a> | <a href="#">HMDB03357</a> | 439232   | 1.34 | 0.1543 | 0.3451 | 0.9582 | 1.2807 | 1.2180 | 1.0080 |
| 401 |                                                  | trans-4-hydroxyproline         | LC/MS pos early | 32306 | <a href="#">C01157</a> | <a href="#">HMDB00725</a> | 5910     | 1.05 | 0.5203 | 0.5263 | 1.0643 | 1.1173 | 1.0752 | 1.0181 |

|     |         |                                        |                 |       |                        |                           |           |      |        |        |        |        |        |        |
|-----|---------|----------------------------------------|-----------------|-------|------------------------|---------------------------|-----------|------|--------|--------|--------|--------|--------|--------|
| 403 |         | pro-hydroxy-pro                        | LC/MS pos early | 35127 |                        | <a href="#">HMDB06695</a> | 11673055  | 1.10 | 0.5143 | 0.5251 | 1.0948 | 1.2043 | 1.1938 | 1.1922 |
| 406 |         | N-methylproline                        | LC/MS pos early | 37431 |                        |                           | 557       | 2.37 | 0.0462 | 0.1889 | 1.2524 | 2.8624 | 2.5518 | 1.5070 |
| 410 |         | argininate*                            | LC/MS pos early | 57461 |                        | <a href="#">HMDB03148</a> | 160437    | 1.04 | 0.9038 | 0.6250 | 1.0533 | 1.0924 | 1.0596 | 0.9737 |
| 415 |         | guanidinoacetate                       | LC/MS pos early | 43802 | <a href="#">C00581</a> | <a href="#">HMDB00128</a> | 763       | 0.95 | 0.6689 | 0.5731 | 1.0264 | 0.9797 | 0.9818 | 1.0082 |
| 416 |         | creatine                               | LC/MS pos early | 27718 | <a href="#">C00300</a> | <a href="#">HMDB00064</a> | 586       | 1.09 | 0.4567 | 0.5037 | 0.9703 | 1.0583 | 1.0819 | 1.0009 |
| 417 |         | creatinine                             | LC/MS pos early | 513   | <a href="#">C00791</a> | <a href="#">HMDB00562</a> | 588       | 0.91 | 0.0775 | 0.2550 | 1.0869 | 0.9923 | 0.9861 | 0.9758 |
| 426 |         | spermidine                             | LC/MS pos early | 485   | <a href="#">C00315</a> | <a href="#">HMDB01257</a> | 1102      | 1.16 | 0.7139 | 0.5865 | 0.9577 | 1.1086 | 1.0889 | 0.9332 |
| 430 |         | acisoga                                | LC/MS pos early | 43268 |                        |                           | 123997    | 1.12 | 0.3687 | 0.4613 | 1.1080 | 1.2458 | 1.1934 | 1.3593 |
| 434 |         | 5-methylthioadenosine (MTA)            | LC/MS pos early | 1419  | <a href="#">C00170</a> | <a href="#">HMDB01173</a> | 439176    | 0.90 | 0.3662 | 0.4613 | 1.0816 | 0.9707 | 0.9675 | 0.8998 |
| 435 |         | N-acetylputrescine                     | LC/MS pos early | 37496 | <a href="#">C02714</a> | <a href="#">HMDB02064</a> | 122356    | 1.16 | 0.4002 | 0.4811 | 1.0356 | 1.2053 | 1.2120 | 1.1436 |
| 439 |         | 4-acetamidobutanoate                   | LC/MS pos early | 1558  | <a href="#">C02946</a> | <a href="#">HMDB03681</a> | 18188     | 0.95 | 0.6411 | 0.5662 | 1.1521 | 1.0919 | 1.0580 | 0.9540 |
| 444 |         | 4-guanidinobutanoate                   | LC/MS pos early | 15681 | <a href="#">C01035</a> | <a href="#">HMDB03464</a> | 500       | 1.03 | 0.8661 | 0.6152 | 1.2429 | 1.2852 | 1.2513 | 0.9975 |
| 445 |         | guanidinoluccinate                     | LC/MS polar     | 32446 | <a href="#">C03139</a> | <a href="#">HMDB03157</a> | 97856     | 1.36 | 0.1029 | 0.2856 | 1.1794 | 1.5894 | 1.5756 | 1.5951 |
| 450 |         | cysteine- glutathione disulfide        | LC/MS pos early | 35159 |                        | <a href="#">HMDB00656</a> | 4247235   | 1.32 | 0.4841 | 0.5126 | 1.0923 | 1.4449 | 1.3537 | 1.1939 |
| 453 |         | cysteinylglycine                       | LC/MS pos early | 35637 | <a href="#">C01419</a> | <a href="#">HMDB00078</a> | 439498    | 0.72 | 0.3512 | 0.4591 | 1.3892 | 1.0029 | 1.0916 | 1.2114 |
| 455 |         | cys-gly, oxidized                      | LC/MS pos early | 18388 |                        |                           | 333203    | 0.76 | 0.1733 | 0.3533 | 1.2353 | 0.9367 | 0.9672 | 0.7645 |
| 456 |         | 5-oxoproline                           | LC/MS neg       | 1494  | <a href="#">C01879</a> | <a href="#">HMDB00267</a> | 7405      | 1.01 | 0.7256 | 0.5855 | 0.9998 | 1.0111 | 1.0089 | 0.9804 |
| 457 |         | 2-aminobutyrate                        | LC/MS pos early | 42374 | <a href="#">C02261</a> | <a href="#">HMDB00650</a> | 439691    | 0.86 | 0.0051 | 0.2333 | 1.0788 | 0.9260 | 0.9690 | 0.9430 |
| 459 |         | 2-hydroxybutyrate/2-hydroxyisobutyrate | LC/MS polar     | 52281 |                        |                           |           | 1.18 | 0.0966 | 0.2783 | 0.9912 | 1.1703 | 1.1477 | 1.2528 |
| 470 |         | gamma-glutamylalanine                  | LC/MS pos early | 37063 |                        | <a href="#">HMDB29142</a> | 440103    | 0.78 | 0.0102 | 0.0987 | 1.1479 | 0.8941 | 0.8908 | 0.8833 |
| 472 |         | gamma-glutamylglutamate                | LC/MS pos early | 36738 | <a href="#">C05282</a> | <a href="#">HMDB11737</a> | 92865     | 1.15 | 0.4302 | 0.4934 | 0.9814 | 1.1281 | 1.1178 | 0.9966 |
| 473 |         | gamma-glutamylglutamine                | LC/MS pos early | 2730  | <a href="#">C05283</a> | <a href="#">HMDB11738</a> | 150914    | 1.01 | 0.9114 | 0.6250 | 0.9936 | 1.0054 | 1.0183 | 0.9302 |
| 474 |         | gamma-glutamylglycine                  | LC/MS pos early | 33949 |                        | <a href="#">HMDB11667</a> | 165527    | 1.08 | 0.7514 | 0.5938 | 1.0962 | 1.1818 | 1.1455 | 1.0241 |
| 475 |         | gamma-glutamylhistidine                | LC/MS pos early | 18245 |                        |                           | 7017195   | 0.81 | 0.0159 | 0.1152 | 1.1180 | 0.9040 | 0.9193 | 0.8232 |
| 476 |         | gamma-glutamylisoleucine*              | LC/MS neg       | 34457 |                        | <a href="#">HMDB11170</a> | 14253342  | 0.87 | 0.3490 | 0.4588 | 1.3000 | 1.1267 | 1.1020 | 1.0553 |
| 477 |         | gamma-glutamylleucine                  | LC/MS pos early |       |                        | <a href="#">HMDB11171</a> | 151023    | 0.82 | 0.1061 | 0.2870 | 1.2071 | 0.9949 | 0.9972 | 0.9297 |
| 478 |         | gamma-glutamyl-alpha-lysine            | LC/MS pos early | 18369 |                        |                           | 65254     | 0.82 | 0.0231 | 0.1341 | 1.1397 | 0.9317 | 0.9727 | 0.8519 |
| 479 |         | gamma-glutamyl-epsilon-lysine          | LC/MS pos early | 55015 |                        | <a href="#">HMDB03869</a> | 7015685   | 0.85 | 0.0803 | 0.2563 | 1.0643 | 0.9064 | 0.9217 | 0.8127 |
| 480 |         | gamma-glutamylmethionine               | LC/MS neg       | 33934 |                        | <a href="#">HMDB29155</a> | 7005967   | 0.80 | 0.0352 | 0.1684 | 1.1771 | 0.9459 | 0.9495 | 0.8268 |
| 481 |         | gamma-glutamylphenylalanine            | LC/MS pos early | 44872 |                        | <a href="#">HMDB00594</a> | 111299    | 0.78 | 0.0903 | 0.2674 | 1.2496 | 0.9740 | 0.9696 | 0.8857 |
| 482 |         | gamma-glutamylthreonine                | LC/MS pos early | 33422 |                        | <a href="#">HMDB29159</a> | 76078708  | 0.88 | 0.2471 | 0.4130 | 1.1495 | 1.0109 | 1.1117 | 0.9369 |
| 483 |         | gamma-glutamyltryptophan               | LC/MS pos early | 33364 |                        | <a href="#">HMDB29160</a> | 3989307   | 1.00 | 0.5186 | 0.5283 | 1.1013 | 1.1039 | 1.0669 | 1.0084 |
| 484 |         | gamma-glutamyltyrosine                 | LC/MS neg       | 33947 |                        | <a href="#">HMDB11741</a> | 94340     | 0.90 | 0.2766 | 0.4311 | 1.0950 | 0.9852 | 0.9937 | 0.8184 |
| 485 |         | gamma-glutamylvaline                   | LC/MS pos early | 2734  |                        | <a href="#">HMDB11172</a> | 7015683   | 0.90 | 0.3306 | 0.4524 | 1.1613 | 1.0415 | 1.0447 | 1.0311 |
| 486 |         | gamma-glutamylserine                   | LC/MS pos early | 43829 |                        |                           |           | 1.02 | 0.7932 | 0.6033 | 0.9816 | 1.0010 | 0.9921 | 1.0168 |
| 488 |         | gamma-glutamyl-2-aminobutyrate         | LC/MS pos early | 54914 |                        |                           |           | 0.65 | 0.0790 | 0.2552 | 0.9814 | 0.8363 | 0.6878 | 0.6716 |
| 646 | Peptide | glycylvaline                           | LC/MS pos early | 37092 |                        | <a href="#">HMDB28854</a> | 97417     | 1.18 | 0.0569 | 0.2168 | 0.8654 | 1.0169 | 0.9041 | 1.1357 |
| 651 |         | histidylalanine                        | LC/MS neg       | 18357 |                        | <a href="#">HMDB28878</a> | 351667    | 0.99 | 0.8485 | 0.6084 | 1.1295 | 1.1149 | 1.1241 | 1.2584 |
| 670 |         | isoleucylglycine                       | LC/MS neg       | 42027 |                        | <a href="#">HMDB28907</a> | 342532    | 1.05 | 0.4235 | 0.4921 | 1.0131 | 1.0594 | 1.0533 | 1.0164 |
| 684 |         | leucylalanine                          | LC/MS pos early | 40008 |                        | <a href="#">HMDB28922</a> | 259321    | 1.24 | 0.4210 | 0.4904 | 0.9693 | 1.2053 | 1.2098 | 1.3953 |
| 689 |         | leucylglycine                          | LC/MS pos early | 40010 |                        | <a href="#">HMDB28929</a> | 79070     | 0.99 | 0.9405 | 0.6350 | 0.9783 | 0.9727 | 1.0307 | 1.0089 |
| 738 |         | phenylalanylalanine                    | LC/MS neg       | 40045 |                        |                           | 5488196   | 0.81 | 0.1262 | 0.3128 | 1.0583 | 0.8527 | 0.8963 | 0.8537 |
| 742 |         | phenylalanylglycine                    | LC/MS pos early | 41374 |                        | <a href="#">HMDB28995</a> | 98207     | 0.95 | 0.7271 | 0.5865 | 1.0799 | 1.0217 | 0.9942 | 0.9164 |
| 761 |         | prolylglycine                          | LC/MS pos early | 41370 |                        | <a href="#">HMDB11178</a> | 6426708   | 0.79 | 0.1162 | 0.3004 | 1.3883 | 1.0972 | 1.0439 | 1.0565 |
| 799 |         | threonylphenylalanine                  | LC/MS pos early | 40703 |                        | <a href="#">HMDB29068</a> | 4099799   | 1.15 | 0.4161 | 0.4900 | 1.0567 | 1.2129 | 1.1574 | 1.1095 |
| 841 |         | valylglutamine                         | LC/MS pos early | 31530 |                        | <a href="#">HMDB29125</a> | 5253209   | 0.99 | 0.9514 | 0.6381 | 1.0508 | 1.0355 | 1.0790 | 1.2172 |
| 845 |         | valylleucine                           | LC/MS pos early | 42079 |                        | <a href="#">HMDB29131</a> | 352039    | 0.83 | 0.1550 | 0.3452 | 1.0409 | 0.8598 | 0.8747 | 0.8923 |
| 855 |         | leucylglutamine*                       | LC/MS pos early | 39994 |                        | <a href="#">HMDB28927</a> | 4305457   | 0.84 | 0.4511 | 0.5022 | 1.0835 | 0.9154 | 1.0176 | 1.1229 |
| 904 |         | Fibrinopeptide A*                      | LC/MS pos early | 48189 |                        |                           | 16133137  | 0.95 | 0.6203 | 0.5637 | 0.8500 | 0.8050 | 0.7473 | 0.8748 |
| 912 |         | Fibrinopeptide A, des-ala(1)*          | LC/MS neg       | 33084 |                        |                           |           | 1.06 | 0.6733 | 0.5745 | 1.0737 | 1.1341 | 1.1036 | 1.0535 |
| 929 |         | phenylacetylcarbamitine                | LC/MS pos early | 31548 |                        |                           | 101724840 | 1.20 | 0.4423 | 0.4987 | 1.6743 | 2.0054 | 1.9589 | 2.7887 |
| 931 |         | phenylacetylglutamate                  | LC/MS neg       | 48425 |                        | <a href="#">HMDB59772</a> | 11579826  | 1.23 | 0.4046 | 0.4827 | 1.1048 | 1.3548 | 1.2385 | 1.6413 |
| 932 |         | phenylacetylglutamine                  | LC/MS neg       | 52925 | <a href="#">C04148</a> | <a href="#">HMDB06344</a> | 92258     | 1.01 | 0.4972 | 0.5166 | 1.5674 | 1.5824 | 1.5551 | 1.7568 |
| 934 |         | 4-hydroxyphenylacetylglutamine         | LC/MS neg       | 35126 |                        |                           |           | 0.94 | 0.8059 | 0.6043 | 1.2865 | 1.2093 | 1.1972 | 0.7389 |

|      |              |                                                      |                                          |                 |       |                        |                           |          |      |        |        |        |        |        |        |
|------|--------------|------------------------------------------------------|------------------------------------------|-----------------|-------|------------------------|---------------------------|----------|------|--------|--------|--------|--------|--------|--------|
| 961  |              |                                                      | 1,5-anhydroglucitol (1,5-AG)             | LC/MS neg       | 55017 | <a href="#">C07326</a> | <a href="#">HMDB02712</a> | 64990    | 0.92 | 0.6512 | 0.5694 | 1.0837 | 1.0006 | 0.9996 | 0.8619 |
| 964  |              |                                                      | glucose                                  | LC/MS polar     | 20675 | <a href="#">C00031</a> | <a href="#">HMDB00122</a> | 79025    | 0.96 | 0.3386 | 0.4524 | 1.0468 | 1.0039 | 0.9957 | 0.9917 |
| 980  |              | Glycolysis, Gluconeogenesis, and Pyruvate Metabolism | pyruvate                                 | LC/MS polar     | 48152 | <a href="#">C00022</a> | <a href="#">HMDB00243</a> | 1090     | 1.42 | 0.3000 | 0.4418 | 1.0824 | 1.5354 | 1.4734 | 2.0412 |
| 981  |              |                                                      | lactate                                  | LC/MS neg       | 48990 | <a href="#">C00186</a> | <a href="#">HMDB00190</a> | 612      | 1.10 | 0.3604 | 0.4613 | 0.9923 | 1.0913 | 1.0729 | 1.1916 |
| 984  |              |                                                      | glycerate                                | LC/MS polar     | 527   | <a href="#">C00258</a> | <a href="#">HMDB00139</a> | 752      | 1.15 | 0.0198 | 0.1237 | 0.9746 | 1.1251 | 1.1001 | 1.0573 |
| 1002 |              |                                                      | ribose                                   | LC/MS polar     | 1572  | <a href="#">C00121</a> | <a href="#">HMDB00283</a> | 5779     | 1.29 | 0.2321 | 0.3993 | 0.9839 | 1.2653 | 1.1830 | 1.3311 |
| 1003 |              |                                                      | ribitol                                  | LC/MS polar     | 1471  | <a href="#">C00474</a> | <a href="#">HMDB00508</a> | 6912     | 0.95 | 0.9250 | 0.6294 | 1.0846 | 1.0348 | 0.9959 | 0.9766 |
| 1004 |              |                                                      | ribonate                                 | LC/MS polar     | 15772 | <a href="#">C01685</a> | <a href="#">HMDB00867</a> | 5460677  | 1.18 | 0.0388 | 0.1741 | 0.9473 | 1.1225 | 1.0806 | 1.0572 |
| 1008 |              | Pentose Metabolism                                   | xylose                                   | LC/MS polar     | 27731 | <a href="#">C00181</a> | <a href="#">HMDB00098</a> | 135191   | 0.86 | 0.6800 | 0.5765 | 0.9007 | 0.7780 | 0.7476 | 0.5815 |
| 1010 |              |                                                      | arabinose                                | LC/MS polar     | 15581 | <a href="#">C00216</a> | <a href="#">HMDB00646</a> | 66308    | 1.06 | 0.3409 | 0.4524 | 0.9211 | 0.9796 | 0.9333 | 0.8469 |
| 1016 |              |                                                      | arabitol/xyllitol                        | LC/MS polar     | 575   | <a href="#">C01904</a> |                           | 6912     | 0.92 | 0.6148 | 0.5637 | 1.2970 | 1.1914 | 1.1524 | 1.2245 |
| 1024 |              |                                                      | arabonate/xyllonate                      | LC/MS polar     | 48886 |                        |                           |          | 1.08 | 0.4065 | 0.4827 | 1.0376 | 1.1193 | 1.0602 | 0.9976 |
| 1027 | Carbohydrate |                                                      | sedoheptulose                            | LC/MS polar     | 48255 |                        | <a href="#">HMDB03219</a> | 5459979  | 0.55 | 0.7051 | 0.5845 | 2.2030 | 1.2129 | 1.1436 | 0.5722 |
| 1037 |              | Glycogen Metabolism                                  | maltose                                  | LC/MS polar     | 53237 | <a href="#">C00208</a> | <a href="#">HMDB00163</a> | 10991489 | 1.00 | 0.6062 | 0.5637 | 1.1946 | 1.1985 | 1.0930 | 1.2619 |
| 1059 |              | Disaccharides and Oligosaccharides                   | sucrose                                  | LC/MS polar     | 15586 | <a href="#">C00089</a> | <a href="#">HMDB00258</a> | 5988     | 2.40 | 0.0872 | 0.2642 | 0.9328 | 2.2424 | 1.9357 | 3.3090 |
| 1077 |              |                                                      | fructose                                 | LC/MS polar     | 1519  | <a href="#">C00095</a> | <a href="#">HMDB00660</a> | 5984     | 0.77 | 0.0064 | 0.0791 | 1.1359 | 0.8743 | 0.8890 | 0.8571 |
| 1082 |              | Fructose, Mannose and Galactose Metabolism           | mammil/sorbitol                          | LC/MS polar     | 48195 | <a href="#">C00794</a> | <a href="#">HMDB00247</a> | 5780     | 1.05 | 0.4561 | 0.5037 | 3.9634 | 4.1493 | 3.7700 | 3.0258 |
| 1083 |              |                                                      | mannose                                  | LC/MS polar     | 46142 | <a href="#">C00159</a> | <a href="#">HMDB00169</a> | 18950    | 1.08 | 0.2098 | 0.3810 | 0.9651 | 1.0430 | 1.0226 | 1.0375 |
| 1103 |              |                                                      | galactonate                              | LC/MS polar     | 48153 | <a href="#">C00880</a> | <a href="#">HMDB00565</a> | 128989   | 0.45 | 0.3963 | 0.4798 | 2.2456 | 1.0209 | 0.9496 | 0.8721 |
| 1135 |              |                                                      | glucuronate                              | LC/MS polar     | 27719 | <a href="#">C00191</a> | <a href="#">HMDB00127</a> | 444791   | 1.19 | 0.9105 | 0.6250 | 1.1345 | 1.3539 | 1.2897 | 1.0113 |
| 1146 |              | Aminosugar Metabolism                                | N-acetylneuraminic acid                  | LC/MS polar     | 15443 | <a href="#">C00270</a> | <a href="#">HMDB00230</a> | 439197   | 1.02 | 0.6663 | 0.5722 | 1.0682 | 1.0911 | 1.0681 | 1.0742 |
| 1157 |              |                                                      | N-acetylglucosaminylasparagine           | LC/MS pos early | 32377 | <a href="#">C04540</a> | <a href="#">HMDB00489</a> | 123826   | 1.19 | 0.4967 | 0.5051 | 0.8482 | 1.0082 | 0.9670 | 0.9390 |
| 1158 |              |                                                      | erythronate*                             | LC/MS polar     | 48149 |                        | <a href="#">HMDB00613</a> | 2781043  | 1.01 | 0.8333 | 0.6058 | 1.0773 | 1.0850 | 1.0490 | 1.0237 |
| 1160 |              |                                                      | N-acetylglucosamineN-acetylgalactosamine | LC/MS pos early | 42420 |                        | <a href="#">HMDB00215</a> | 24139    | 1.06 | 0.2803 | 0.4336 | 1.0422 | 1.1075 | 1.0796 | 1.0701 |
| 1161 |              | Advanced Glycation End-product                       | NG-carboxymethyllysine                   | LC/MS pos early | 46539 |                        |                           | 123800   | 1.16 | 0.5107 | 0.5251 | 1.1580 | 1.3471 | 1.3046 | 1.2208 |
| 1165 |              |                                                      | citrate                                  | LC/MS neg       | 36713 | <a href="#">C00158</a> | <a href="#">HMDB00094</a> | 311      | 1.16 | 0.1443 | 0.3340 | 0.9804 | 1.1350 | 1.0879 | 1.1470 |
| 1167 |              |                                                      | aconitate [cis or trans]                 | LC/MS neg       | 1594  |                        |                           |          | 1.20 | 0.1589 | 0.3488 | 1.0362 | 1.2461 | 1.1836 | 1.2291 |
| 1169 |              |                                                      | isocitrate                               | LC/MS pos early | 46173 | <a href="#">C00311</a> | <a href="#">HMDB00193</a> | 1198     | 0.97 | 0.7385 | 0.5903 | 1.0178 | 0.9916 | 0.9959 | 0.9907 |
| 1171 |              |                                                      | alpha-ketoglutarate                      | LC/MS polar     | 12110 | <a href="#">C00026</a> | <a href="#">HMDB00208</a> | 51       | 1.11 | 0.2914 | 0.4392 | 1.0667 | 1.1874 | 1.1332 | 1.2906 |
| 1173 |              | TCA Cycle                                            | succinylcarnitine (C4-DC)                | LC/MS pos early | 528   |                        | <a href="#">HMDB61717</a> | 7146481  | 1.02 | 0.7047 | 0.5845 | 1.0242 | 1.0408 | 1.0310 | 0.9595 |
| 1174 |              |                                                      | succinate                                | LC/MS neg       | 37058 | <a href="#">C00042</a> | <a href="#">HMDB00254</a> | 1110     | 1.17 | 0.1064 | 0.2870 | 0.9615 | 1.1287 | 1.0847 | 1.0453 |
| 1175 |              |                                                      | fumarate                                 | LC/MS polar     | 1437  | <a href="#">C00122</a> | <a href="#">HMDB00134</a> | 444972   | 1.00 | 0.8107 | 0.6052 | 1.0158 | 1.0196 | 0.9881 | 1.0335 |
| 1177 |              |                                                      | malate                                   | LC/MS neg       | 1643  | <a href="#">C00149</a> | <a href="#">HMDB00156</a> | 525      | 1.28 | 0.0104 | 0.0987 | 0.9515 | 1.2151 | 1.1543 | 1.1897 |
| 1187 |              |                                                      | 2-methylcitrate/homocitrate              | LC/MS neg       | 1303  |                        |                           |          | 1.01 | 0.8062 | 0.6043 | 1.0541 | 1.0617 | 1.0567 | 1.0239 |
| 1191 |              | Oxidative Phosphorylation                            | phosphate                                | LC/MS neg       | 52282 | <a href="#">C00009</a> | <a href="#">HMDB01429</a> | 1061     | 0.95 | 0.3045 | 0.4447 | 0.9964 | 0.9493 | 0.9557 | 0.9895 |
| 1193 |              |                                                      | malonylcarnitine                         | LC/MS pos early | 42109 |                        | <a href="#">HMDB02095</a> | 22833583 | 1.01 | 0.9466 | 0.6374 | 1.0571 | 1.0690 | 1.0440 | 1.1091 |
| 1194 |              | Fatty Acid Synthesis                                 | malonate                                 | LC/MS polar     | 37059 | <a href="#">C00383</a> | <a href="#">HMDB00691</a> | 867      | 1.39 | 0.0066 | 0.0791 | 0.8812 | 1.2244 | 1.1539 | 1.0766 |
| 1195 |              |                                                      | 2-methylmalonylcarnitine (C4-DC)         | LC/MS pos early | 15872 |                        | <a href="#">HMDB13133</a> | 53481628 | 1.08 | 0.3196 | 0.4524 | 0.9901 | 1.0679 | 1.0932 | 0.9823 |
| 1211 |              |                                                      | caprylate (8:0)                          | LC/MS neg       | 35482 | <a href="#">C06423</a> | <a href="#">HMDB00482</a> | 379      | 1.74 | 0.0471 | 0.1894 | 0.8892 | 1.5466 | 1.4035 | 1.7705 |
| 1212 |              |                                                      | pelargolate (9:0)                        | LC/MS neg       | 32492 | <a href="#">C01601</a> | <a href="#">HMDB00847</a> | 8158     | 1.03 | 0.5596 | 0.5471 | 1.0984 | 1.1360 | 1.0841 | 1.1112 |
| 1213 |              | Medium Chain Fatty Acid                              | caprate (10:0)                           | LC/MS neg       | 12035 | <a href="#">C01571</a> | <a href="#">HMDB00511</a> | 2969     | 1.56 | 0.0157 | 0.1152 | 0.9828 | 1.5319 | 1.4676 | 1.9011 |
| 1216 |              |                                                      | 10-undecanoate (11:1n1)                  | LC/MS neg       | 1642  | <a href="#">C13910</a> | <a href="#">HMDB33724</a> | 14891    | 1.61 | 0.2522 | 0.4190 | 0.8697 | 1.4038 | 1.3233 | 1.7886 |
| 1217 |              |                                                      | laurate (12:0)                           | LC/MS neg       | 32497 | <a href="#">C02679</a> | <a href="#">HMDB00638</a> | 3893     | 1.88 | 0.0002 | 0.0078 | 0.7829 | 1.5488 | 1.4656 | 1.6399 |
| 1218 |              |                                                      | 5-dodecanoate (12:1n7)                   | LC/MS neg       | 1645  |                        | <a href="#">HMDB00529</a> | 5312376  | 2.14 | 0.0112 | 0.0967 | 0.8858 | 1.8963 | 1.7508 | 2.2112 |
| 1220 |              |                                                      | myristate (14:0)                         | LC/MS neg       | 33968 | <a href="#">C06424</a> | <a href="#">HMDB00806</a> | 11005    | 1.65 | 0.0119 | 0.1004 | 0.8941 | 1.4761 | 1.4173 | 1.7516 |
| 1221 |              |                                                      | myristoleate (14:1n5)                    | LC/MS neg       | 1365  | <a href="#">C08322</a> | <a href="#">HMDB02000</a> | 5281119  | 1.74 | 0.0140 | 0.1092 | 0.9131 | 1.5916 | 1.4879 | 1.8084 |
| 1224 |              |                                                      | pentadecanoate (15:0)                    | LC/MS neg       | 32418 | <a href="#">C16537</a> | <a href="#">HMDB00826</a> | 13849    | 1.34 | 0.0243 | 0.1386 | 0.9098 | 1.2203 | 1.1925 | 1.3411 |
| 1225 |              |                                                      | palmitate (16:0)                         | LC/MS neg       | 1361  | <a href="#">C00249</a> | <a href="#">HMDB00220</a> | 985      | 1.26 | 0.0282 | 0.1494 | 0.8704 | 1.0925 | 1.0638 | 1.1761 |
| 1226 |              |                                                      | palmitoleate (16:1n7)                    | LC/MS neg       | 1336  | <a href="#">C08362</a> | <a href="#">HMDB03229</a> | 445638   | 1.74 | 0.0177 | 0.1198 | 0.8969 | 1.5593 | 1.5130 | 1.7255 |
| 1228 |              |                                                      | margarate (17:0)                         | LC/MS neg       | 33447 |                        | <a href="#">HMDB02259</a> | 10465    | 1.48 | 0.0107 | 0.0967 | 0.9350 | 1.3846 | 1.3083 | 1.4570 |
| 1229 |              |                                                      | 10-heptadecanoate (17:1n7)               | LC/MS neg       | 1121  |                        | <a href="#">HMDB60038</a> | 5312435  | 1.61 | 0.0215 | 0.1290 | 0.8142 | 1.3136 | 1.2469 | 1.4389 |
| 1231 |              | Long Chain Fatty Acid                                | stearate (18:0)                          | LC/MS neg       | 33971 | <a href="#">C01530</a> | <a href="#">HMDB00827</a> | 5281     | 1.19 | 0.0294 | 0.1494 | 0.9023 | 1.0733 | 1.0389 | 1.1323 |
| 1233 |              |                                                      | decaevaccenate (18:1)                    | LC/MS neg       | 1358  |                        |                           |          | 1.33 | 0.0273 | 0.1494 | 0.8449 | 1.1239 | 1.0793 | 1.1779 |
| 1240 |              |                                                      | nonadecanoate (19:0)                     | LC/MS neg       | 52285 | <a href="#">C16535</a> | <a href="#">HMDB00772</a> | 12591    | 1.44 | 0.0062 | 0.0791 | 0.8647 | 1.2460 | 1.2052 | 1.3172 |

|      |  |                                                      |                 |       |                        |                           |          |      |        |        |        |        |        |        |
|------|--|------------------------------------------------------|-----------------|-------|------------------------|---------------------------|----------|------|--------|--------|--------|--------|--------|--------|
| 1241 |  | 10-nonadecenoate (19:1n6)                            | LC/MS neg       | 1356  |                        | <a href="#">HMDB13622</a> | 5312513  | 1.66 | 0.0099 | 0.0967 | 0.8408 | 1.3917 | 1.2919 | 1.4493 |
| 1244 |  | arachidate (20:0)                                    | LC/MS neg       | 33972 | <a href="#">C06425</a> | <a href="#">HMDB02212</a> | 10467    | 1.30 | 0.0187 | 0.1225 | 0.9789 | 1.2736 | 1.2298 | 1.3696 |
| 1247 |  | eicosenoate (20:1)                                   | LC/MS neg       | 1118  | <a href="#">C16526</a> | <a href="#">HMDB02231</a> | 5282798  | 1.74 | 0.0068 | 0.0791 | 0.7917 | 1.3795 | 1.3081 | 1.4054 |
| 1252 |  | erucate (22:1n7)                                     | LC/MS neg       | 33567 | <a href="#">C08316</a> | <a href="#">HMDB02068</a> | 5281116  | 2.05 | 0.0192 | 0.1226 | 0.9119 | 1.8722 | 1.8711 | 2.1272 |
| 1265 |  | stearidonate (18:4n3)                                | LC/MS neg       | 1552  | <a href="#">C16300</a> | <a href="#">HMDB06547</a> | 5312598  | 1.84 | 0.0035 | 0.0608 | 0.8280 | 1.5209 | 1.5311 | 1.5856 |
| 1266 |  | eicosapentaenoate (EPA; 20:5n3)                      | LC/MS neg       | 33969 | <a href="#">C06428</a> | <a href="#">HMDB01999</a> | 446284   | 1.14 | 0.2958 | 0.4397 | 1.2882 | 1.4693 | 1.7058 | 1.5374 |
| 1267 |  | docosapentaenoate (n3 DPA; 22:5n3)                   | LC/MS neg       | 18467 | <a href="#">C16513</a> | <a href="#">HMDB06528</a> | 6441454  | 1.16 | 0.1598 | 0.3488 | 0.9370 | 1.0869 | 1.0709 | 1.1092 |
| 1268 |  | docosahexaenoate (DHA; 22:6n3)                       | LC/MS neg       | 32504 | <a href="#">C06429</a> | <a href="#">HMDB02183</a> | 445580   | 1.22 | 0.1072 | 0.2870 | 0.9650 | 1.1736 | 1.2224 | 1.2218 |
| 1269 |  | docosatrienoate (22:3n3)                             | LC/MS neg       | 44675 | <a href="#">C16534</a> | <a href="#">HMDB02823</a> | 5312556  | 1.36 | 0.2917 | 0.4362 | 0.9165 | 1.2446 | 1.1220 | 1.1299 |
| 1273 |  | linoleate (18:2n6)                                   | LC/MS neg       | 32417 | <a href="#">C01595</a> | <a href="#">HMDB00673</a> | 5280450  | 1.31 | 0.0453 | 0.1889 | 0.8803 | 1.1566 | 1.1118 | 1.2352 |
| 1275 |  | linolenate (alpha or gamma; 18:3n3 or 6)             | LC/MS neg       | 1105  | <a href="#">C06426</a> | <a href="#">HMDB03073</a> | 5280934  | 1.43 | 0.0268 | 0.1710 | 1.0035 | 1.4390 | 1.4150 | 1.4698 |
| 1277 |  | dhomo-linolenate (20:3n3 or n6)                      | LC/MS neg       | 34035 | <a href="#">C03242</a> | <a href="#">HMDB02925</a> | 5280581  | 1.22 | 0.0791 | 0.2552 | 0.9354 | 1.1448 | 1.0957 | 1.2116 |
| 1278 |  | arachidonate (20:4n6)                                | LC/MS neg       | 35718 | <a href="#">C00219</a> | <a href="#">HMDB01043</a> | 444899   | 1.08 | 0.3310 | 0.4524 | 0.9507 | 1.0276 | 1.0399 | 1.0324 |
| 1279 |  | adrenate (22:4n6)                                    | LC/MS neg       | 1110  | <a href="#">C16527</a> | <a href="#">HMDB02226</a> | 5497181  | 1.20 | 0.0953 | 0.2776 | 0.9524 | 1.1440 | 1.1016 | 1.1681 |
| 1280 |  | docosapentaenoate (n6 DPA; 22:5n6)                   | LC/MS neg       | 32980 | <a href="#">C16513</a> | <a href="#">HMDB01976</a> | 6441454  | 1.24 | 0.0302 | 0.1512 | 0.8718 | 1.0804 | 1.0873 | 1.1431 |
| 1281 |  | docosadienoate (22:2n6)                              | LC/MS neg       | 37478 | <a href="#">C16533</a> | <a href="#">HMDB61714</a> | 5282807  | 1.37 | 0.0114 | 0.0987 | 0.9258 | 1.2657 | 1.2055 | 1.2933 |
| 1282 |  | dhomo-linoleate (20:2n6)                             | LC/MS neg       | 32415 | <a href="#">C16525</a> | <a href="#">HMDB05060</a> | 6439848  | 1.39 | 0.0179 | 0.1198 | 0.9073 | 1.2633 | 1.1788 | 1.2935 |
| 1284 |  | mead acid (20:3n7)                                   | LC/MS neg       | 17805 |                        | <a href="#">HMDB10378</a> | 5312531  | 1.40 | 0.0287 | 0.1494 | 1.0021 | 1.4079 | 1.3547 | 1.4246 |
| 1285 |  | docosatrienoate (22:3n6)*                            | LC/MS neg       | 35174 |                        |                           |          | 1.23 | 0.3090 | 0.4473 | 1.1432 | 1.4091 | 1.1992 | 1.1777 |
| 1337 |  | (12 or 13)-methylmyristate (a15:0 or 115:0)          | LC/MS neg       | 57467 |                        |                           | 151014   | 1.85 | 0.0432 | 0.1842 | 1.0117 | 1.8680 | 1.7469 | 2.5009 |
| 1340 |  | (14 or 15)-methylpalmitate (a17:0 or 117:0)          | LC/MS neg       | 38293 |                        |                           | 17903417 | 1.51 | 0.0630 | 0.2285 | 0.8919 | 1.3437 | 1.2440 | 1.6210 |
| 1344 |  | (16 or 17)-methylstearate (a19:0 or 119:0)           | LC/MS neg       | 38768 |                        | <a href="#">HMDB37397</a> | 3083779  | 1.47 | 0.0156 | 0.1152 | 0.8447 | 1.2399 | 1.1565 | 1.3358 |
| 1359 |  | glutarate (C5-DC)                                    | LC/MS polar     | 38296 | <a href="#">C00489</a> | <a href="#">HMDB00661</a> | 743      | 0.91 | 0.2455 | 0.4129 | 1.7439 | 1.5868 | 1.5017 | 2.0187 |
| 1362 |  | 3-methylglutarate/2-methylglutarate                  | LC/MS polar     | 396   |                        | <a href="#">HMDB00752</a> |          | 1.31 | 0.7062 | 0.5845 | 1.1327 | 1.4876 | 1.3866 | 1.2632 |
| 1363 |  | 2-hydroxyglutarate                                   | LC/MS polar     | 54676 | <a href="#">C02630</a> | <a href="#">HMDB00606</a> | 43       | 1.17 | 0.6485 | 0.5690 | 1.1419 | 1.3374 | 1.2424 | 1.2289 |
| 1365 |  | adipate (C6-DC)                                      | LC/MS polar     | 37253 | <a href="#">C06104</a> | <a href="#">HMDB00448</a> | 106      | 1.50 | 0.7094 | 0.5847 | 0.8928 | 1.3413 | 1.2403 | 1.2346 |
| 1367 |  | 2-hydroxyadipate                                     | LC/MS polar     | 21134 | <a href="#">C02360</a> | <a href="#">HMDB00321</a> | 193593   | 0.96 | 0.0463 | 0.1889 | 1.3448 | 0.7499 | 0.7444 | 0.6744 |
| 1369 |  | 3-methyladipate                                      | LC/MS polar     | 31934 |                        | <a href="#">HMDB00555</a> | 12392    | 1.88 | 0.7356 | 0.5888 | 1.1040 | 2.0791 | 2.0913 | 2.6468 |
| 1371 |  | malate                                               | LC/MS polar     | 36749 | <a href="#">C01384</a> | <a href="#">HMDB00176</a> | 444266   | 0.92 | 0.9784 | 0.6456 | 1.1766 | 1.0834 | 1.0284 | 1.0909 |
| 1372 |  | pinelate (C7-DC)                                     | LC/MS polar     | 20676 | <a href="#">C02656</a> | <a href="#">HMDB00857</a> | 385      | 1.50 | 0.1679 | 0.3488 | 0.8343 | 1.2553 | 1.2302 | 1.2888 |
| 1375 |  | suberate (C8-DC)                                     | LC/MS neg       | 15704 | <a href="#">C08278</a> | <a href="#">HMDB00893</a> | 10457    | 1.35 | 0.1603 | 0.3488 | 0.9502 | 1.2866 | 1.2240 | 1.2134 |
| 1378 |  | azelate (C9-DC)                                      | LC/MS neg       | 15730 | <a href="#">C08261</a> | <a href="#">HMDB00784</a> | 2266     | 1.34 | 0.0511 | 0.2007 | 0.9023 | 1.2102 | 1.1153 | 1.1365 |
| 1380 |  | sebacate (C10-DC)                                    | LC/MS polar     | 18362 | <a href="#">C08277</a> | <a href="#">HMDB00792</a> | 5192     | 1.85 | 0.1279 | 0.3153 | 0.9973 | 1.8427 | 1.8465 | 2.1452 |
| 1384 |  | dodecanedioate (C12-DC)                              | LC/MS neg       | 32398 | <a href="#">C02678</a> | <a href="#">HMDB00623</a> | 12736    | 1.65 | 0.2650 | 0.4204 | 1.0648 | 1.7541 | 1.6007 | 1.6330 |
| 1387 |  | tetradecanedioate (C14-DC)                           | LC/MS neg       | 32388 |                        | <a href="#">HMDB00872</a> | 13185    | 1.62 | 0.3681 | 0.4613 | 1.0977 | 1.7746 | 1.6231 | 1.9347 |
| 1388 |  | hexadecanedioate (C16-DC)                            | LC/MS neg       | 35699 | <a href="#">C19615</a> | <a href="#">HMDB00672</a> | 104059   | 1.79 | 0.0998 | 0.2819 | 1.0036 | 1.7947 | 1.6250 | 1.9331 |
| 1391 |  | octadecanedioate (C18-DC)                            | LC/MS neg       | 35678 |                        | <a href="#">HMDB00782</a> | 70095    | 1.42 | 0.0837 | 0.2623 | 1.1733 | 1.6611 | 1.5289 | 1.7571 |
| 1395 |  | eicosanedioate (C20-DC)                              | LC/MS neg       | 36754 |                        |                           | 75502    | 0.82 | 0.3396 | 0.4524 | 1.1648 | 0.9578 | 0.9203 | 0.8706 |
| 1397 |  | docosadioate (C22-DC)                                | LC/MS neg       | 39831 | <a href="#">C19625</a> |                           | 244872   | 0.71 | 0.0982 | 0.2814 | 1.2391 | 0.8854 | 0.8622 | 0.7589 |
| 1398 |  | 3-carboxy-4-methyl-5-propyl-2-furanpropanoate (CMPF) | LC/MS neg       | 39837 |                        | <a href="#">HMDB61112</a> | 123979   | 0.81 | 0.2280 | 0.3948 | 1.0226 | 0.8285 | 0.9967 | 0.7802 |
| 1442 |  | 2-aminoheptanoate                                    | LC/MS pos early | 31787 |                        |                           | 227939   | 1.03 | 0.8391 | 0.6058 | 1.0264 | 1.0534 | 1.0257 | 0.9891 |
| 1447 |  | 2-aminooctanoate                                     | LC/MS neg       | 43761 |                        | <a href="#">HMDB00991</a> | 69522    | 0.96 | 0.8572 | 0.6130 | 1.0673 | 1.0236 | 1.0149 | 1.0094 |
| 1458 |  | butyrylcarnitine (C4)                                | LC/MS pos early | 43343 | <a href="#">C02862</a> | <a href="#">HMDB02013</a> | 439820   | 1.16 | 0.6098 | 0.5637 | 1.0315 | 1.1938 | 1.1665 | 1.3106 |
| 1461 |  | propionylcarnitine (C3)                              | LC/MS pos early | 32412 | <a href="#">C03017</a> | <a href="#">HMDB00824</a> | 107738   | 0.89 | 0.4581 | 0.5037 | 1.1152 | 0.9931 | 1.0302 | 0.9365 |
| 1462 |  | propionylglycine                                     | LC/MS neg       | 32452 |                        | <a href="#">HMDB00783</a> | 98681    | 1.33 | 0.2685 | 0.4235 | 1.1115 | 1.4752 | 1.4328 | 1.1265 |
| 1464 |  | methylmalonate (MMA)                                 | LC/MS polar     | 31932 | <a href="#">C02170</a> | <a href="#">HMDB00202</a> | 487      | 0.83 | 0.5759 | 0.5489 | 1.5380 | 1.2713 | 1.2115 | 0.8040 |
| 1465 |  | hexanoylglycine                                      | LC/MS neg       | 1496  |                        |                           |          | 2.76 | 0.0487 | 0.1939 | 0.8277 | 2.2867 | 2.0555 | 1.6557 |
| 1476 |  | hexanoylglycine                                      | LC/MS neg       | 54907 |                        | <a href="#">HMDB00701</a> | 99463    | 3.99 | 0.0031 | 0.0608 | 0.6408 | 2.5595 | 2.2546 | 1.7424 |
| 1482 |  | N-palmitoylglycine                                   | LC/MS neg       | 35436 |                        | <a href="#">HMDB13034</a> | 151008   | 1.64 | 0.0000 | 0.0018 | 0.7821 | 1.2816 | 1.2157 | 1.2733 |
| 1492 |  | acetyl carnitine (C2)                                | LC/MS pos early | 42092 | <a href="#">C02571</a> | <a href="#">HMDB00201</a> | 1        | 1.34 | 0.1533 | 0.3451 | 0.9877 | 1.3294 | 1.2688 | 1.3644 |
| 1494 |  | 3-hydroxybutyrylcarnitine (1)                        | LC/MS pos early | 32198 |                        | <a href="#">HMDB13127</a> | 53481617 | 1.40 | 0.2572 | 0.4196 | 1.0863 | 1.5161 | 1.3806 | 1.6275 |
| 1495 |  | 3-hydroxybutyrylcarnitine (2)                        | LC/MS pos early | 43264 |                        | <a href="#">HMDB13127</a> |          | 1.65 | 0.1935 | 0.3668 | 1.1071 | 1.8300 | 1.6604 | 2.3503 |
| 1497 |  | hexanoylcarnitine (C6)                               | LC/MS pos early | 52964 |                        | <a href="#">HMDB00705</a> | 6428853  | 1.65 | 0.1908 | 0.3668 | 1.0066 | 1.6587 | 1.5379 | 1.9337 |
| 1500 |  | octanoylcarnitine (C8)                               | LC/MS pos late  | 32328 | <a href="#">C02838</a> | <a href="#">HMDB00791</a> | 123701   | 1.72 | 0.4468 | 0.5006 | 1.0883 | 1.8674 | 1.7076 | 2.3056 |

|      |                                        |                                                    |                 |       |                        |                           |          |      |        |        |        |        |        |        |
|------|----------------------------------------|----------------------------------------------------|-----------------|-------|------------------------|---------------------------|----------|------|--------|--------|--------|--------|--------|--------|
| 1503 |                                        | decanoylcarnitine (C10)                            | LC/MS pos late  | 33936 |                        | <a href="#">HMDB00651</a> | 10245190 | 1.59 | 0.4894 | 0.5136 | 1.0618 | 1.6862 | 1.5486 | 2.1138 |
| 1506 |                                        | cis-4-decenoylcarnitine (C10:1)                    | LC/MS pos late  | 33941 |                        |                           |          | 1.43 | 0.7452 | 0.5938 | 1.1102 | 1.5827 | 1.4566 | 1.9608 |
| 1507 |                                        | laurylcarnitine (C12)                              | LC/MS pos late  | 38178 |                        | <a href="#">HMDB02250</a> | 10427599 | 1.39 | 0.6694 | 0.5731 | 1.0774 | 1.4947 | 1.3907 | 1.8628 |
| 1508 |                                        | myristoylcarnitine (C14)                           | LC/MS pos late  | 34534 |                        | <a href="#">HMDB05066</a> | 6426854  | 1.49 | 0.1920 | 0.3668 | 0.9237 | 1.3724 | 1.2765 | 1.5700 |
| 1510 |                                        | palmitoylcarnitine (C16)                           | LC/MS pos late  | 33952 | <a href="#">C02990</a> | <a href="#">HMDB00222</a> | 461      | 1.18 | 0.1231 | 0.3107 | 0.9353 | 1.1018 | 1.0920 | 1.1459 |
| 1511 |                                        | palmitoleoylcarnitine (C16:1)*                     | LC/MS pos late  | 44681 |                        |                           | 71464547 | 1.49 | 0.2261 | 0.3941 | 0.9519 | 1.4204 | 1.3236 | 1.4971 |
| 1512 |                                        | stearoylcarnitine (C18)                            | LC/MS pos late  | 53223 |                        | <a href="#">HMDB00848</a> | 6426855  | 1.30 | 0.0034 | 0.0608 | 0.8964 | 1.1677 | 1.1391 | 1.1354 |
| 1513 |                                        | linoleoylcarnitine (C18:2)*                        | LC/MS pos late  | 34409 |                        | <a href="#">HMDB06469</a> | 6450015  | 1.06 | 0.6346 | 0.5662 | 1.0712 | 1.1309 | 1.0771 | 1.1608 |
| 1514 |                                        | linolenoylcarnitine (C18:3)*                       | LC/MS pos late  | 46223 |                        |                           |          | 0.93 | 0.7851 | 0.6012 | 1.1299 | 1.0538 | 1.0310 | 1.0417 |
| 1516 |                                        | oleoylcarnitine (C18:1)                            | LC/MS pos late  | 57511 |                        | <a href="#">HMDB05065</a> | 6441392  | 1.21 | 0.2121 | 0.3810 | 0.9976 | 1.2099 | 1.1568 | 1.1869 |
| 1518 |                                        | myristoleoylcarnitine (C14:1)*                     | LC/MS pos late  | 35160 |                        |                           | 90659972 | 1.64 | 0.4020 | 0.4811 | 1.0443 | 1.7116 | 1.5513 | 1.9435 |
| 1519 | Fatty Acid Metabolism (Acyl Carnitine) | suberoylcarnitine (C8-DC)                          | LC/MS pos early | 48182 |                        |                           |          | 1.67 | 0.7241 | 0.5855 | 0.8561 | 1.4327 | 1.3067 | 1.1221 |
| 1522 |                                        | adipoylcarnitine (C6-DC)                           | LC/MS pos early | 52990 |                        | <a href="#">HMDB61677</a> | 71296139 | 1.42 | 0.2408 | 0.4069 | 1.0165 | 1.4457 | 1.3399 | 1.3209 |
| 1525 |                                        | pineloylcarnitine/3-methyladipoylcarnitine (C7-DC) | LC/MS pos early | 52988 |                        |                           |          | 1.00 | 0.1916 | 0.3668 | 1.1244 | 1.1233 | 1.4639 | 1.3040 |
| 1529 |                                        | arachidoylcarnitine (C20)*                         | LC/MS pos late  | 53224 |                        | <a href="#">HMDB06460</a> |          | 1.40 | 0.0506 | 0.2003 | 0.9374 | 1.3129 | 1.2720 | 1.2018 |
| 1530 |                                        | arachidonoylcarnitine (C20:4)                      | LC/MS pos late  | 57513 |                        |                           |          | 1.01 | 0.3444 | 0.4540 | 1.1049 | 1.1152 | 1.0978 | 1.0325 |
| 1531 |                                        | adrenoylcarnitine (C22:4)*                         | LC/MS pos late  | 57518 |                        |                           |          | 1.16 | 0.0756 | 0.2548 | 0.9673 | 1.1289 | 1.0880 | 1.0349 |
| 1532 |                                        | behenoylcarnitine (C22)*                           | LC/MS pos late  | 57528 |                        |                           |          | 1.81 | 0.0868 | 0.2642 | 0.9680 | 1.7537 | 1.6780 | 1.8914 |
| 1534 |                                        | dhomo-linolenoylcarnitine (C20:3n3 or 6)*          | LC/MS pos late  | 57514 |                        |                           |          | 1.18 | 0.0949 | 0.2776 | 1.1045 | 1.2987 | 1.2322 | 1.2346 |
| 1535 |                                        | dhomo-linoleoylcarnitine (C20:2)*                  | LC/MS pos late  | 57521 |                        |                           |          | 1.29 | 0.0760 | 0.2548 | 0.9689 | 1.2457 | 1.1601 | 1.1244 |
| 1536 |                                        | eicosenoylcarnitine (C20:1)*                       | LC/MS pos late  | 57520 |                        |                           |          | 1.52 | 0.0774 | 0.2550 | 0.9354 | 1.4199 | 1.3419 | 1.3675 |
| 1540 |                                        | docosapentaenoylcarnitine (C22:5n3)*               | LC/MS pos late  | 57519 |                        |                           |          | 1.01 | 0.6210 | 0.5637 | 1.0284 | 1.0381 | 1.0305 | 1.0489 |
| 1541 |                                        | docosahexaenoylcarnitine (C22:6)*                  | LC/MS pos late  | 57529 |                        |                           |          | 0.96 | 0.9038 | 0.6250 | 1.0929 | 1.0444 | 1.0795 | 1.0801 |
| 1543 |                                        | lignoceroylcarnitine (C24)*                        | LC/MS pos late  | 57523 |                        |                           |          | 1.40 | 0.1064 | 0.2870 | 0.9667 | 1.3559 | 1.3431 | 1.3809 |
| 1544 |                                        | margaroylcarnitine (C17)*                          | LC/MS pos late  | 57515 |                        | <a href="#">HMDB06210</a> |          | 1.32 | 0.0660 | 0.2333 | 1.0671 | 1.4052 | 1.3531 | 1.5859 |
| 1545 |                                        | nervonoylcarnitine (C24:1)*                        | LC/MS pos late  | 57512 |                        |                           |          | 1.48 | 0.0472 | 0.1894 | 0.9449 | 1.3956 | 1.3794 | 1.4399 |
| 1546 |                                        | cerotoylcarnitine (C26)*                           | LC/MS pos late  | 57531 |                        | <a href="#">HMDB06347</a> |          | 1.08 | 0.6198 | 0.5637 | 1.0623 | 1.1482 | 1.1675 | 1.0810 |
| 1547 |                                        | ximenoylcarnitine (C28:1)*                         | LC/MS pos late  | 57516 |                        |                           |          | 1.05 | 0.7780 | 0.5998 | 1.0208 | 1.0742 | 1.0978 | 1.0815 |
| 1553 | Carnitine Metabolism                   | deoxycarnitine                                     | LC/MS pos early | 57517 | <a href="#">C01181</a> | <a href="#">HMDB01161</a> | 134      | 0.82 | 0.0095 | 0.0987 | 1.1383 | 0.9301 | 0.9288 | 0.9238 |
| 1554 |                                        | carnitine                                          | LC/MS pos early | 36747 | <a href="#">C00318</a> | <a href="#">HMDB00062</a> | 10917    | 0.95 | 0.1655 | 0.3488 | 1.0437 | 0.9873 | 0.9999 | 0.9774 |
| 1557 | Ketone Bodies                          | acetoacetate                                       | LC/MS pos early | 15500 | <a href="#">C00164</a> | <a href="#">HMDB00060</a> | 96       | 1.83 | 0.0714 | 0.2472 | 0.8069 | 1.4769 | 1.3872 | 1.5515 |
| 1559 |                                        | 3-hydroxybutyrate (BHBA)                           | LC/MS polar     | 33963 | <a href="#">C01089</a> | <a href="#">HMDB00357</a> | 441      | 2.57 | 0.0356 | 0.1684 | 0.9671 | 2.4834 | 2.2747 | 2.8902 |
| 1562 |                                        | palmitoylcholine                                   | LC/MS pos late  | 542   |                        |                           | 151731   | 0.83 | 0.3295 | 0.4524 | 1.1351 | 0.9437 | 1.0112 | 0.9000 |
| 1563 |                                        | oleoylcholine                                      | LC/MS pos late  | 52944 |                        |                           |          | 0.85 | 0.4262 | 0.4933 | 1.0927 | 0.9315 | 0.9890 | 0.8654 |
| 1564 |                                        | palmitoleoylcholine                                | LC/MS pos late  | 53260 |                        |                           |          | 0.89 | 0.5717 | 0.5478 | 1.0497 | 0.9355 | 1.0442 | 0.9496 |
| 1565 |                                        | dhomo-linolenoylcholine                            | LC/MS pos late  | 53257 |                        |                           |          | 0.94 | 0.5613 | 0.5473 | 1.0381 | 0.9800 | 0.9848 | 0.9271 |
| 1566 | Fatty Acid Metabolism (Acyl Choline)   | linoleoylcholine*                                  | LC/MS pos late  | 53262 |                        |                           |          | 0.76 | 0.1767 | 0.3574 | 1.2137 | 0.9261 | 0.9639 | 0.8525 |
| 1568 |                                        | stearoylcholine*                                   | LC/MS pos late  | 57463 |                        |                           |          | 0.79 | 0.2221 | 0.3910 | 1.1037 | 0.8710 | 0.9421 | 0.7914 |
| 1569 |                                        | docosahexaenoylcholine                             | LC/MS pos late  | 57464 |                        |                           |          | 0.76 | 0.2870 | 0.4347 | 1.1630 | 0.8860 | 1.0361 | 0.8317 |
| 1570 |                                        | arachidonoylcholine                                | LC/MS pos late  | 53263 |                        |                           |          | 0.82 | 0.1704 | 0.3501 | 1.1455 | 0.9374 | 1.0103 | 0.8682 |
| 1571 |                                        | eicosapentaenoylcholine                            | LC/MS pos late  | 53261 |                        |                           |          | 0.72 | 0.1587 | 0.3488 | 1.0351 | 0.7426 | 0.9988 | 0.7809 |
| 1578 |                                        | 2-hydroxyoctanoate                                 | LC/MS neg       | 53258 |                        | <a href="#">HMDB02264</a> | 94180    | 0.97 | 0.9659 | 0.6152 | 1.1041 | 1.0678 | 1.0651 | 1.0755 |
| 1579 |                                        | 2-hydroxydecanoate                                 | LC/MS neg       | 22036 |                        |                           | 21488    | 1.24 | 0.0603 | 0.2250 | 0.9552 | 1.1847 | 1.1738 | 1.3744 |
| 1580 |                                        | 2-hydroxydodecanoate                               | LC/MS neg       | 42489 |                        |                           | 97783    | 0.89 | 0.3128 | 0.4516 | 1.0694 | 0.9500 | 0.9559 | 1.0013 |
| 1582 |                                        | 2-hydroxypalmitate                                 | LC/MS neg       | 52916 |                        | <a href="#">HMDB31057</a> | 92836    | 1.18 | 0.0381 | 0.1725 | 0.8736 | 1.0315 | 1.0169 | 1.0938 |
| 1584 |                                        | 2-hydroxystearate                                  | LC/MS neg       | 35675 | <a href="#">C03045</a> |                           | 69417    | 1.14 | 0.0666 | 0.2842 | 0.8821 | 1.0042 | 0.9892 | 1.0392 |
| 1591 |                                        | 3-hydroxyhexanoate                                 | LC/MS neg       | 17945 |                        |                           | 151492   | 1.41 | 0.1433 | 0.3340 | 0.9669 | 1.3652 | 1.2572 | 1.3555 |
| 1592 |                                        | 3-hydroxyoctanoate                                 | LC/MS neg       | 53230 |                        | <a href="#">HMDB01954</a> | 26613    | 1.26 | 0.4381 | 0.4963 | 0.9688 | 1.2235 | 1.1278 | 1.2904 |
| 1594 | Fatty Acid, Monohydroxy                | 3-hydroxydecanoate                                 | LC/MS neg       | 22001 |                        | <a href="#">HMDB02203</a> | 26612    | 1.35 | 0.1450 | 0.3340 | 0.8902 | 1.2022 | 1.1230 | 1.3371 |
| 1595 |                                        | 3-hydroxydodecanoate                               | LC/MS neg       | 22053 |                        | <a href="#">HMDB00350</a> | 3017884  | 2.22 | 0.4200 | 0.4904 | 0.7259 | 1.6118 | 1.4072 | 1.4861 |
| 1596 |                                        | 3-hydroxydodecanoate                               | LC/MS neg       | 31943 |                        | <a href="#">HMDB00387</a> | 94216    | 1.34 | 0.1226 | 0.3107 | 1.0061 | 1.3446 | 1.2524 | 1.4423 |
| 1604 |                                        | 5-hydroxyhexanoate                                 | LC/MS neg       | 32457 |                        | <a href="#">HMDB00525</a> | 170748   | 0.89 | 0.9077 | 0.6250 | 1.1585 | 1.0288 | 1.0070 | 0.9365 |
| 1611 |                                        | 16-hydroxypalmitate                                | LC/MS neg       | 31938 | <a href="#">C18218</a> | <a href="#">HMDB06294</a> | 10466    | 1.12 | 0.1071 | 0.2870 | 1.0330 | 1.1541 | 1.0873 | 1.0997 |
| 1615 |                                        | 13-HODE + 9-HODE                                   | LC/MS neg       | 39609 |                        |                           | 43013    | 1.31 | 0.0846 | 0.2632 | 0.9894 | 1.2924 | 1.2891 | 1.3268 |

|      |                                            |                                                   |                                       |                 |                        |                           |                           |         |        |        |        |        |        |        |
|------|--------------------------------------------|---------------------------------------------------|---------------------------------------|-----------------|------------------------|---------------------------|---------------------------|---------|--------|--------|--------|--------|--------|--------|
| 1618 |                                            | 14-HDdHE/17-HDdHE                                 | LC/MS neg                             | 37752           |                        |                           |                           | 1.64    | 0.1436 | 0.3340 | 1.2005 | 1.9653 | 1.8976 | 1.4837 |
| 1630 |                                            | 3-hydroxystearate                                 | LC/MS neg                             | 53034           |                        |                           | 5282907                   | 1.11    | 0.1837 | 0.3646 | 1.0805 | 1.1948 | 1.1687 | 1.3795 |
| 1631 |                                            | 9-hydroxystearate                                 | LC/MS neg                             | 52938           |                        | <a href="#">HMDB61661</a> | 9570127                   | 1.42    | 0.0192 | 0.1226 | 0.9753 | 1.3827 | 1.3738 | 1.4976 |
| 1636 | Fatty Acid, Dihydroxy                      | 12,13-DIHOME                                      | LC/MS neg                             | 47120           | <a href="#">C14829</a> | <a href="#">HMDB04705</a> | 10236635                  | 1.33    | 0.1741 | 0.3535 | 0.8956 | 1.1879 | 1.1768 | 1.3357 |
| 1637 |                                            | 9,10-DIHOME                                       | LC/MS neg                             | 38395           | <a href="#">C14828</a> | <a href="#">HMDB04704</a> | 9966640                   | 1.14    | 0.9508 | 0.5433 | 0.9535 | 1.0915 | 1.0491 | 1.1425 |
| 1658 |                                            | thromboxane B2                                    | LC/MS neg                             | 38399           | <a href="#">C05963</a> | <a href="#">HMDB03252</a> | 5283137                   | 1.01    | 0.9117 | 0.6250 | 1.6141 | 1.6249 | 1.6301 | 1.8061 |
| 1717 | Eicosanoid                                 | 12-HETE                                           | LC/MS neg                             | 17807           |                        | <a href="#">HMDB06111</a> | 5312983                   | 1.73    | 0.3055 | 0.4447 | 1.5329 | 2.6447 | 2.6735 | 2.1574 |
| 1719 |                                            | 15-HETE                                           | LC/MS neg                             | 37536           | <a href="#">C04742</a> | <a href="#">HMDB02110</a> | 5280724                   | 1.11    | 0.5861 | 0.5529 | 1.6537 | 1.8288 | 1.7788 | 1.7451 |
| 1723 |                                            | 12-HHTrE                                          | LC/MS neg                             | 37538           | <a href="#">C20388</a> | <a href="#">HMDB12535</a> | 5283141                   | 0.95    | 0.9392 | 0.6350 | 1.8918 | 1.8040 | 1.7476 | 1.8566 |
| 1730 |                                            | oleoyl ethanolamide                               | LC/MS pos late                        | 57383           |                        | <a href="#">HMDB02088</a> | 5283454                   | 1.19    | 0.0742 | 0.2522 | 0.9676 | 1.1474 | 1.1437 | 1.1547 |
| 1733 | Endocannabinoid                            | palmitoyl ethanolamide                            | LC/MS neg                             | 38102           | <a href="#">C16512</a> | <a href="#">HMDB02100</a> | 4671                      | 1.30    | 0.0057 | 0.0776 | 0.9258 | 1.2045 | 1.1864 | 1.1917 |
| 1738 |                                            | arachidonyl ethanolamide                          | LC/MS pos late                        | 38165           | <a href="#">C11695</a> | <a href="#">HMDB04080</a> | 5281969                   | 1.20    | 0.0780 | 0.2551 | 0.8998 | 1.0823 | 1.0813 | 1.0207 |
| 1742 |                                            | N-oleoyltaurine                                   | LC/MS neg                             | 32463           |                        |                           | 6437033                   | 1.67    | 0.0153 | 0.1152 | 0.6575 | 1.4333 | 1.3263 | 1.3559 |
| 1743 |                                            | N-stearoyltaurine                                 | LC/MS neg                             | 39732           |                        |                           | 168274                    | 1.43    | 0.0055 | 0.0771 | 0.7851 | 1.1245 | 1.0681 | 1.1116 |
| 1744 |                                            | N-palmitoyltaurine                                | LC/MS neg                             | 39730           |                        |                           |                           | 1.73    | 0.0539 | 0.2083 | 0.7487 | 1.2923 | 1.1433 | 1.4204 |
| 1748 |                                            | linoleoyl ethanolamide                            | LC/MS neg                             | 39835           |                        | <a href="#">HMDB12252</a> | 5283446                   | 1.37    | 0.0359 | 0.1684 | 0.9408 | 1.2902 | 1.2329 | 1.2502 |
| 1765 |                                            |                                                   | myo-inositol                          | LC/MS polar     | 52808                  | <a href="#">C00137</a>    | <a href="#">HMDB00211</a> | 892     | 0.91   | 0.3707 | 0.4613 | 1.1468 | 1.0487 | 1.0257 |
| 1766 | Inositol Metabolism                        | chiro-inositol                                    | LC/MS polar                           | 1124            | <a href="#">C19891</a> | <a href="#">HMDB34220</a> |                           | 1.28    | 0.5498 | 0.5433 | 1.3095 | 1.6724 | 1.4511 | 1.3158 |
| 1794 | Phospholipid Metabolism                    | choline                                           | LC/MS pos early                       | 37112           | <a href="#">C00114</a> | <a href="#">HMDB00097</a> | 305                       | 1.03    | 0.4136 | 0.4884 | 1.0127 | 1.0478 | 1.0495 | 1.0088 |
| 1795 |                                            | choline phosphate                                 | LC/MS pos early                       | 15506           | <a href="#">C00588</a> | <a href="#">HMDB01565</a> | 1014                      | 0.97    | 0.7257 | 0.5865 | 1.1118 | 1.0803 | 1.0855 | 1.0975 |
| 1798 |                                            | glycerophosphorylcholine (GPC)                    | LC/MS pos early                       | 34396           | <a href="#">C00670</a> | <a href="#">HMDB00086</a> | 71920                     | 0.81    | 0.0161 | 0.1152 | 1.1075 | 0.9009 | 0.9177 | 0.8696 |
| 1800 |                                            | phosphoethanolamine                               | LC/MS pos early                       | 15990           | <a href="#">C00346</a> | <a href="#">HMDB00224</a> | 1015                      | 0.89    | 0.2702 | 0.4249 | 1.2899 | 1.1498 | 1.1366 | 1.3044 |
| 1802 |                                            | glycerophosphoethanolamine                        | LC/MS pos early                       | 1600            | <a href="#">C01233</a> | <a href="#">HMDB00114</a> | 123874                    | 0.98    | 0.7647 | 0.5962 | 1.0381 | 1.0207 | 1.0212 | 1.0003 |
| 1804 |                                            | glycerophosphoinositol*                           | LC/MS neg                             | 37455           |                        |                           | 167572                    | 0.68    | 0.0657 | 0.2333 | 1.2829 | 0.8668 | 0.9351 | 0.8645 |
| 1805 |                                            |                                                   | trimethylamine N-oxide                | LC/MS pos early | 52307                  | <a href="#">C01104</a>    | <a href="#">HMDB00925</a> | 1145    | 1.40   | 0.6759 | 0.5750 | 1.4057 | 1.9652 | 1.7648 |
| 1839 | Phosphatidylcholine (PC)                   | 1,2-dipalmitoyl-GPC (16:0/16:0)                   | LC/MS pos late                        | 40406           |                        | <a href="#">HMDB00564</a> | 452110                    | 1.06    | 0.2818 | 0.4336 | 0.9847 | 1.0428 | 1.0516 | 1.0494 |
| 1840 |                                            | 1-palmitoyl-2-palmitoleoyl-GPC (16:0/18:1)*       | LC/MS pos late                        | 19130           |                        | <a href="#">HMDB07969</a> |                           | 1.26    | 0.2931 | 0.4392 | 1.1040 | 1.3922 | 1.4186 | 1.5085 |
| 1841 |                                            | 1-palmitoyl-2-stearoyl-GPC (16:0/18:0)            | LC/MS pos late                        | 52470           |                        | <a href="#">HMDB07970</a> |                           | 1.03    | 0.7564 | 0.5938 | 1.0596 | 1.0935 | 1.1199 | 1.0606 |
| 1843 |                                            | 1-palmitoyl-2-oleoyl-GPC (16:0/18:1)              | LC/MS pos late                        | 52616           |                        | <a href="#">HMDB07972</a> | 6436017                   | 1.08    | 0.2146 | 0.3810 | 0.9690 | 1.0485 | 1.0510 | 1.0472 |
| 1846 |                                            | 1-palmitoyl-2-linoleoyl-GPC (16:0/18:2)           | LC/MS pos late                        | 52461           |                        | <a href="#">HMDB07973</a> | 5287971                   | 0.99    | 0.8942 | 0.6250 | 1.0077 | 1.0008 | 0.9960 | 1.0104 |
| 1848 |                                            | 1-palmitoyl-2-alpha-linolenoyl-GPC (16:0/18:3n3)* | LC/MS pos late                        | 42446           |                        | <a href="#">HMDB07975</a> |                           | 0.91    | 0.7081 | 0.5845 | 0.9826 | 0.8956 | 0.9494 | 0.9780 |
| 1849 |                                            | 1-palmitoyl-2-gamma-linolenoyl-GPC (16:0/18:3n6)* | LC/MS pos late                        | 52694           |                        | <a href="#">HMDB07974</a> |                           | 1.46    | 0.0165 | 0.1152 | 0.7626 | 1.1135 | 1.1579 | 1.0974 |
| 1857 |                                            | 1-palmitoyl-2-arachidonyl-GPC (16:0/20:4n6)       | LC/MS pos late                        | 54812           |                        | <a href="#">HMDB07982</a> | 10747814                  | 1.00    | 0.8381 | 0.6058 | 0.9837 | 0.9866 | 0.9922 | 0.9808 |
| 1868 |                                            | 1-palmitoleoyl-2-linoleoyl-GPC (16:1/18:2)*       | LC/MS pos late                        | 52462           |                        | <a href="#">HMDB08006</a> |                           | 0.94    | 0.5618 | 0.5473 | 1.0767 | 1.0159 | 0.9823 | 1.0105 |
| 1869 |                                            | 1-palmitoleoyl-2-linolenoyl-GPC (16:1/18:3)*      | LC/MS pos late                        | 52683           |                        | <a href="#">HMDB08008</a> |                           | 1.01    | 0.8884 | 0.6250 | 1.0867 | 1.0989 | 1.1288 | 1.1540 |
| 1879 |                                            | 1-stearoyl-2-oleoyl-GPC (18:0/18:1)               | LC/MS pos late                        | 53180           |                        | <a href="#">HMDB08038</a> |                           | 1.07    | 0.3418 | 0.4524 | 0.9971 | 1.0711 | 1.0816 | 1.0605 |
| 1882 |                                            | 1-stearoyl-2-linoleoyl-GPC (18:0/18:2)*           | LC/MS pos late                        | 52438           |                        | <a href="#">HMDB08039</a> |                           | 0.98    | 0.5281 | 0.5310 | 1.0213 | 0.9961 | 0.9950 | 0.9718 |
| 1890 |                                            | 1-stearoyl-2-arachidonyl-GPC (18:0/20:4)          | LC/MS pos late                        | 52452           |                        | <a href="#">HMDB08048</a> | 16219824                  | 0.96    | 0.4778 | 0.5112 | 1.0203 | 0.9825 | 0.9964 | 0.9533 |
| 1915 |                                            | 1,2-dilinoleoyl-GPC (18:2/18:2)                   | LC/MS pos late                        | 42450           |                        | <a href="#">HMDB08138</a> | 5288075                   | 1.03    | 0.9583 | 0.6388 | 1.0468 | 1.0777 | 1.0430 | 1.0430 |
| 1916 |                                            | 1-linoleoyl-2-linolenoyl-GPC (18:2/18:3)*         | LC/MS pos late                        | 52693           |                        | <a href="#">HMDB08141</a> |                           | 0.89    | 0.3918 | 0.4792 | 1.1847 | 1.0521 | 1.0647 | 1.0388 |
| 1919 |                                            | 1-linoleoyl-2-arachidonyl-GPC (18:2/20:4n6)*      | LC/MS pos late                        | 53176           |                        | <a href="#">HMDB08147</a> |                           | 1.01    | 0.7948 | 0.6033 | 1.0267 | 1.0346 | 1.0121 | 0.9938 |
| 1961 |                                            | Phosphatidylethanolamine (PE)                     | 1-palmitoyl-2-oleoyl-GPE (16:0/18:1)  | LC/MS pos late  | 52710                  |                           | <a href="#">HMDB05320</a> | 5283496 | 1.14   | 0.5671 | 0.5478 | 1.1782 | 1.3409 | 1.3062 |
| 1962 | 1-palmitoyl-2-linoleoyl-GPE (16:0/18:2)    |                                                   | LC/MS pos late                        | 19263           |                        | <a href="#">HMDB05322</a> | 9546747                   | 1.17    | 0.4865 | 0.5126 | 1.0010 | 1.1740 | 1.1379 | 1.4100 |
| 1965 | 1-palmitoyl-2-arachidonyl-GPE (16:0/20:4)* |                                                   | LC/MS pos late                        | 42449           |                        | <a href="#">HMDB05323</a> | 9546900                   | 1.09    | 0.3954 | 0.4591 | 1.1353 | 1.2403 | 1.2204 | 1.3315 |
| 1974 | 1-stearoyl-2-oleoyl-GPE (18:0/18:1)        |                                                   | LC/MS pos late                        | 52464           |                        | <a href="#">HMDB08993</a> |                           | 1.10    | 0.9053 | 0.6250 | 1.1595 | 1.2798 | 1.2759 | 1.5423 |
| 1977 | 1-stearoyl-2-linoleoyl-GPE (18:0/18:2)*    |                                                   | LC/MS pos late                        | 42448           |                        | <a href="#">HMDB08994</a> | 9546749                   | 1.02    | 0.9599 | 0.6391 | 0.9590 | 0.9710 | 0.9666 | 1.0551 |
| 1982 | 1-stearoyl-2-arachidonyl-GPE (18:0/20:4)   |                                                   | LC/MS pos late                        | 52446           |                        | <a href="#">HMDB09003</a> | 5289133                   | 1.04    | 0.5957 | 0.5597 | 1.0226 | 1.0607 | 1.0461 | 1.0971 |
| 2060 |                                            |                                                   | 1-palmitoyl-2-oleoyl-GPI (16:0/18:1)* | LC/MS polar     | 52447                  |                           | <a href="#">HMDB09783</a> |         | 0.98   | 0.7193 | 0.5865 | 1.0453 | 1.0222 | 1.0496 |
| 2062 | Phosphatidylinositol (PI)                  | 1-palmitoyl-2-linoleoyl-GPI (16:0/18:2)           | LC/MS pos late                        | 52699           |                        | <a href="#">HMDB09784</a> |                           | 1.24    | 0.5343 | 0.5359 | 1.0417 | 1.2943 | 1.2799 | 1.5943 |
| 2064 |                                            | 1-palmitoyl-2-arachidonyl-GPI (16:0/20:4)*        | LC/MS pos late                        | 52450           |                        | <a href="#">HMDB09789</a> |                           | 1.11    | 0.6906 | 0.5810 | 0.9614 | 1.0718 | 1.1346 | 1.1518 |
| 2067 |                                            | 1-stearoyl-2-oleoyl-GPI (18:0/18:1)*              | LC/MS pos late                        | 52467           |                        |                           |                           | 1.33    | 0.1000 | 0.2819 | 1.0188 | 1.3503 | 1.3149 | 1.4146 |
| 2068 |                                            | 1-stearoyl-2-linoleoyl-GPI (18:0/18:2)            | LC/MS pos late                        | 52726           |                        | <a href="#">HMDB09809</a> |                           | 1.04    | 0.8630 | 0.6152 | 1.0052 | 1.0444 | 1.0495 | 1.1420 |
| 2079 |                                            | 1-stearoyl-2-arachidonyl-GPI (18:0/20:4)          | LC/MS pos late                        | 52468           |                        | <a href="#">HMDB09815</a> |                           | 1.00    | 0.9767 | 0.6453 | 1.0081 | 1.0125 | 1.0142 | 0.9800 |
| 2102 |                                            |                                                   | 1-palmitoyl-GPA (16:0)                | LC/MS neg       | 52449                  | <a href="#">C04036</a>    | <a href="#">HMDB00327</a> | 6419701 | 1.30   | 0.0198 | 0.1237 | 0.8180 | 1.1367 | 1.0759 |



|      |       |                  |                                                        |                 |       |                        |                           |          |      |        |        |        |        |        |        |
|------|-------|------------------|--------------------------------------------------------|-----------------|-------|------------------------|---------------------------|----------|------|--------|--------|--------|--------|--------|--------|
| 2106 |       |                  | 1-linoleoyl-GPA (18:2)*                                | LC/MS neg       | 34428 |                        | <a href="#">HMDB07856</a> |          | 1.27 | 0.3053 | 0.4447 | 0.8881 | 1.1276 | 1.0614 | 1.1462 |
| 2110 |       |                  | 1-arachidonoyl-GPA (20:4)                              | LC/MS neg       | 52690 |                        |                           |          | 1.15 | 0.6201 | 0.5637 | 1.2608 | 1.4525 | 1.4027 | 1.3471 |
| 2117 |       |                  | 1-palmitoyl-GPC (16:0)                                 | LC/MS pos late  | 46325 |                        | <a href="#">HMDB10382</a> | 86554    | 1.01 | 0.6963 | 0.5809 | 1.0106 | 1.0244 | 1.0384 | 1.0186 |
| 2118 |       |                  | 2-palmitoyl-GPC (16:0)*                                | LC/MS neg       | 33965 |                        | <a href="#">HMDB61702</a> | 15061532 | 1.10 | 0.3733 | 0.4633 | 1.0400 | 1.1405 | 1.1232 | 1.0033 |
| 2119 |       |                  | 1-palmitoleoyl-GPC (16:1)*                             | LC/MS pos late  | 35253 |                        | <a href="#">HMDB10383</a> | 24770461 | 1.14 | 0.3672 | 0.4613 | 1.1076 | 1.2660 | 1.2757 | 1.2752 |
| 2125 |       |                  | 1-stearoyl-GPC (18:0)                                  | LC/MS pos late  | 33230 |                        | <a href="#">HMDB10384</a> | 497299   | 0.98 | 0.8219 | 0.6058 | 1.0202 | 1.0037 | 1.0301 | 0.9519 |
| 2127 |       |                  | 1-oleoyl-GPC (18:1)                                    | LC/MS pos late  | 33961 |                        | <a href="#">HMDB02815</a> | 16081932 | 1.07 | 0.3560 | 0.4591 | 0.9787 | 1.0432 | 1.0433 | 0.9961 |
| 2130 |       |                  | 1-linoleoyl-GPC (18:2)                                 | LC/MS pos late  | 48258 | <a href="#">C04100</a> | <a href="#">HMDB10386</a> | 11988421 | 0.97 | 0.5737 | 0.5478 | 1.0216 | 0.9895 | 0.9883 | 0.9811 |
| 2132 |       |                  | 1-linolenoyl-GPC (18:3)*                               | LC/MS pos late  | 34419 |                        | <a href="#">HMDB10388</a> |          | 1.02 | 0.9447 | 0.6369 | 0.9996 | 1.0176 | 1.0002 | 0.9999 |
| 2148 |       |                  | 1-arachidonoyl-GPC (20:4n6)*                           | LC/MS pos late  | 45951 | <a href="#">C05208</a> | <a href="#">HMDB10395</a> |          | 0.99 | 0.8997 | 0.6250 | 1.0175 | 1.0092 | 1.0290 | 0.9810 |
| 2159 |       |                  | 1-lignoceroyl-GPC (24:0)                               | LC/MS pos late  | 33228 |                        | <a href="#">HMDB10405</a> |          | 1.13 | 0.4390 | 0.4963 | 0.9206 | 1.0268 | 1.0746 | 1.0662 |
| 2169 |       |                  | 1-palmitoyl-GPE (16:0)                                 | LC/MS pos late  | 49617 |                        | <a href="#">HMDB11503</a> | 9547069  | 1.14 | 0.1636 | 0.3488 | 0.9408 | 1.0788 | 1.0714 | 1.0874 |
| 2176 |       |                  | 1-stearoyl-GPE (18:0)                                  | LC/MS pos late  | 35531 |                        | <a href="#">HMDB11130</a> | 9547068  | 1.08 | 0.4138 | 0.4884 | 1.0064 | 1.0917 | 1.0933 | 1.0945 |
| 2177 | Lipid | Lysophospholipid | 2-stearoyl-GPE (18:0)*                                 | LC/MS neg       | 42388 |                        | <a href="#">HMDB11129</a> |          | 1.18 | 0.1331 | 0.3221 | 1.0258 | 1.2114 | 1.1713 | 1.1337 |
| 2178 |       |                  | 1-oleoyl-GPE (18:1)                                    | LC/MS pos late  | 41220 |                        | <a href="#">HMDB11506</a> | 9547071  | 1.04 | 0.5367 | 0.5363 | 1.0622 | 1.1089 | 1.0974 | 1.0986 |
| 2180 |       |                  | 1-linoleoyl-GPE (18:2)*                                | LC/MS pos late  | 35628 |                        | <a href="#">HMDB11507</a> | 52925130 | 1.13 | 0.2856 | 0.4347 | 1.0054 | 1.1319 | 1.0960 | 1.1822 |
| 2191 |       |                  | 1-arachidonoyl-GPE (20:4n6)*                           | LC/MS pos late  | 36800 |                        | <a href="#">HMDB11517</a> | 42807465 | 1.15 | 0.1331 | 0.3221 | 1.0149 | 1.1637 | 1.1229 | 1.1678 |
| 2211 |       |                  | 1-palmitoyl-GPE (16:0)*                                | LC/MS neg       | 35186 |                        |                           | 3300276  | 1.04 | 0.7738 | 0.5995 | 0.9811 | 1.0233 | 0.9691 | 1.1257 |
| 2213 |       |                  | 1-stearoyl-GPG (18:0)                                  | LC/MS neg       | 45970 |                        |                           |          | 1.20 | 0.6943 | 0.5722 | 0.8211 | 0.9827 | 0.9473 | 0.9013 |
| 2215 |       |                  | 1-oleoyl-GPG (18:1)*                                   | LC/MS neg       | 34437 |                        |                           |          | 0.76 | 0.2257 | 0.3941 | 0.7111 | 0.5414 | 0.4951 | 0.4599 |
| 2217 |       |                  | 1-linoleoyl-GPG (18:2)*                                | LC/MS neg       | 45968 |                        |                           |          | 1.37 | 0.2805 | 0.4336 | 1.0916 | 1.4922 | 1.4192 | 1.3791 |
| 2218 |       |                  | 1-palmitoyl-GPI (16:0)                                 | LC/MS neg       | 54885 |                        | <a href="#">HMDB61695</a> |          | 1.23 | 0.2804 | 0.4196 | 1.0523 | 1.2966 | 1.2799 | 1.3847 |
| 2221 |       |                  | 1-stearoyl-GPI (18:0)                                  | LC/MS pos late  | 35305 |                        | <a href="#">HMDB61696</a> |          | 0.92 | 0.5140 | 0.5251 | 1.0524 | 0.9673 | 0.9941 | 0.9375 |
| 2223 |       |                  | 1-oleoyl-GPI (18:1)*                                   | LC/MS neg       | 19324 |                        |                           |          | 1.15 | 0.2118 | 0.3810 | 0.9742 | 1.1189 | 1.1066 | 1.1281 |
| 2225 |       |                  | 1-linoleoyl-GPI (18:2)*                                | LC/MS neg       | 36602 |                        |                           |          | 1.13 | 0.4288 | 0.4934 | 1.0480 | 1.1856 | 1.1608 | 1.2837 |
| 2229 |       |                  | 1-arachidonoyl-GPI (20:4)*                             | LC/MS neg       | 36594 |                        | <a href="#">HMDB61690</a> |          | 1.16 | 0.2384 | 0.4063 | 1.0241 | 1.1887 | 1.1586 | 1.0962 |
| 2322 |       |                  | 1-(1-enyl-palmitoyl)-2-oleoyl-GPE (P-16:0/18:1)*       | LC/MS pos late  | 34214 |                        | <a href="#">HMDB11342</a> |          | 1.26 | 0.0411 | 0.1800 | 0.9965 | 1.2560 | 1.1888 | 1.1133 |
| 2323 |       |                  | 1-(1-enyl-palmitoyl)-2-linoleoyl-GPE (P-16:0/18:2)*    | LC/MS pos late  | 52477 |                        | <a href="#">HMDB11343</a> |          | 1.25 | 0.0917 | 0.2700 | 1.0325 | 1.2870 | 1.2158 | 1.0941 |
| 2324 |       |                  | 1-(1-enyl-palmitoyl)-2-palmitoyl-GPC (P-16:0/16:0)*    | LC/MS pos late  | 52677 |                        | <a href="#">HMDB11206</a> | 11146967 | 1.13 | 0.2295 | 0.3961 | 1.0068 | 1.1424 | 1.1248 | 1.1986 |
| 2325 |       |                  | 1-(1-enyl-palmitoyl)-2-palmitoleoyl-GPC (P-16:0/16:1)* | LC/MS pos late  | 52716 |                        | <a href="#">HMDB11207</a> |          | 1.11 | 0.7334 | 0.5888 | 1.0295 | 1.1435 | 1.1005 | 1.1482 |
| 2326 |       |                  | 1-(1-enyl-palmitoyl)-2-arachidonoyl-GPE (P-16:0/20:4)* | LC/MS pos late  | 52713 |                        | <a href="#">HMDB11352</a> |          | 1.10 | 0.4281 | 0.4934 | 1.0314 | 1.1339 | 1.0970 | 0.9789 |
| 2328 |       |                  | 1-(1-enyl-palmitoyl)-2-oleoyl-GPC (P-16:0/18:1)*       | LC/MS pos late  | 52673 |                        |                           |          | 1.04 | 0.9100 | 0.6250 | 1.0001 | 1.0395 | 1.0233 | 1.0331 |
| 2330 |       |                  | 1-(1-enyl-stearoyl)-2-oleoyl-GPE (P-18:0/18:1)         | LC/MS pos late  | 52478 |                        | <a href="#">HMDB11375</a> |          | 1.28 | 0.0698 | 0.2449 | 1.0579 | 1.3553 | 1.3004 | 1.1807 |
| 2331 |       |                  | 1-(1-enyl-stearoyl)-2-linoleoyl-GPE (P-18:0/18:2)*     | LC/MS pos late  | 52614 |                        | <a href="#">HMDB11376</a> |          | 1.32 | 0.0706 | 0.2460 | 1.0200 | 1.3425 | 1.2967 | 1.1836 |
| 2334 |       |                  | 1-(1-enyl-palmitoyl)-2-arachidonoyl-GPC (P-16:0/20:4)* | LC/MS pos late  | 52748 |                        | <a href="#">HMDB11220</a> |          | 1.10 | 0.4072 | 0.4827 | 1.0246 | 1.1300 | 1.1142 | 1.0928 |
| 2335 |       |                  | 1-(1-enyl-palmitoyl)-2-linoleoyl-GPC (P-16:0/18:2)*    | LC/MS pos late  | 52689 |                        | <a href="#">HMDB11211</a> |          | 1.09 | 0.6712 | 0.5737 | 1.0350 | 1.1291 | 1.1000 | 1.1380 |
| 2339 |       |                  | 1-(1-enyl-stearoyl)-2-arachidonoyl-GPE (P-18:0/20:4)*  | LC/MS pos late  | 52682 |                        | <a href="#">HMDB05779</a> | 9547058  | 1.10 | 0.4687 | 0.5059 | 1.0514 | 1.1543 | 1.1457 | 0.9935 |
| 2354 |       |                  | 1-(1-enyl-palmitoyl)-GPC (P-16:0)*                     | LC/MS pos late  | 52475 |                        | <a href="#">HMDB10407</a> | 10917802 | 1.06 | 0.5860 | 0.5529 | 1.0598 | 1.1278 | 1.1347 | 1.0512 |
| 2355 |       |                  | 1-(1-enyl-palmitoyl)-GPE (P-16:0)*                     | LC/MS pos late  | 52474 |                        |                           |          | 1.04 | 0.7489 | 0.5938 | 1.0425 | 1.0839 | 1.0784 | 0.9788 |
| 2357 |       |                  | 1-(1-enyl-oleoyl)-GPE (P-18:1)*                        | LC/MS pos late  | 39270 |                        |                           |          | 1.06 | 0.6567 | 0.5708 | 1.0557 | 1.1235 | 1.1295 | 1.0091 |
| 2359 |       |                  | 1-(1-enyl-stearoyl)-GPE (P-18:0)*                      | LC/MS pos late  | 44621 |                        |                           |          | 1.05 | 0.7468 | 0.5938 | 1.0918 | 1.1487 | 1.1721 | 0.9961 |
| 2362 |       |                  | glycerol                                               | LC/MS neg       | 39271 | <a href="#">C00116</a> | <a href="#">HMDB00131</a> | 753      | 1.15 | 0.1380 | 0.3283 | 1.0230 | 1.1789 | 1.1296 | 1.2386 |
| 2363 |       |                  | glycerol 3-phosphate                                   | LC/MS pos early | 15122 | <a href="#">C00093</a> | <a href="#">HMDB00126</a> | 754      | 1.08 | 0.3626 | 0.4613 | 1.0562 | 1.1429 | 1.1020 | 1.1720 |
| 2369 |       |                  | 1-myristoylglycerol (14:0)                             | LC/MS neg       | 43947 | <a href="#">C01885</a> | <a href="#">HMDB11561</a> | 79090    | 0.84 | 0.5278 | 0.5310 | 1.1599 | 0.9676 | 1.0222 | 1.1187 |
| 2372 |       |                  | 1-palmitoylglycerol (16:0)                             | LC/MS neg       | 35625 |                        | <a href="#">HMDB31074</a> | 14900    | 0.74 | 0.8480 | 0.6084 | 2.4992 | 1.8433 | 1.6974 | 1.7563 |
| 2373 |       |                  | 1-palmitoleoylglycerol (16:1)*                         | LC/MS neg       | 21127 |                        | <a href="#">HMDB11565</a> |          | 1.04 | 0.7494 | 0.5938 | 1.2758 | 1.3224 | 1.4370 | 1.5418 |
| 2376 |       |                  | 1-oleoylglycerol (18:1)                                | LC/MS neg       | 52431 |                        | <a href="#">HMDB11567</a> | 5283468  | 0.86 | 0.9363 | 0.6345 | 1.2496 | 1.0705 | 1.0938 | 0.9976 |
| 2377 |       |                  | 1-linoleoylglycerol (18:2)                             | LC/MS neg       | 21184 |                        |                           | 5283469  | 0.90 | 0.9090 | 0.6250 | 1.2529 | 1.1245 | 1.1005 | 1.1309 |
| 2378 |       |                  | 1-linolenoylglycerol (18:3)                            | LC/MS neg       | 27447 |                        | <a href="#">HMDB11569</a> | 53480978 | 0.51 | 0.0090 | 0.0953 | 1.4045 | 0.7167 | 0.8626 | 0.7278 |
| 2382 |       |                  | 1-dihomo-linolenylglycerol (20:3)                      | LC/MS neg       | 34393 |                        |                           |          | 1.06 | 0.4944 | 0.5147 | 1.0424 | 1.1072 | 1.0613 | 1.1454 |
| 2383 |       |                  | 1-arachidonylglycerol (20:4)                           | LC/MS neg       | 48341 | <a href="#">C13857</a> | <a href="#">HMDB11549</a> | 5282281  | 0.91 | 0.8460 | 0.6083 | 1.1501 | 1.0498 | 1.0528 | 1.0007 |
| 2386 |       |                  | 1-docosahexaenylglycerol (22:6)                        | LC/MS neg       | 34397 |                        | <a href="#">HMDB11587</a> |          | 0.99 | 0.7948 | 0.6033 | 1.0422 | 1.0274 | 1.1035 | 1.0559 |
| 2388 |       |                  | 2-palmitoylglycerol (16:0)                             | LC/MS neg       | 35153 |                        | <a href="#">HMDB11533</a> | 123409   | 0.75 | 0.5472 | 0.5430 | 1.6566 | 1.2433 | 1.1603 | 1.3344 |
| 2391 |       |                  | 2-oleoylglycerol (18:1)                                | LC/MS neg       | 33419 |                        | <a href="#">HMDB11537</a> | 5319879  | 0.77 | 0.4734 | 0.5079 | 1.2087 | 0.9302 | 0.9562 | 0.9444 |

|      |                          |                                                              |                |       |                        |                           |         |      |        |        |        |        |        |        |
|------|--------------------------|--------------------------------------------------------------|----------------|-------|------------------------|---------------------------|---------|------|--------|--------|--------|--------|--------|--------|
| 2392 |                          | 2-linoleoylglycerol (18:2)                                   | LC/MS neg      | 21232 |                        | <a href="#">HMDB11538</a> | 5365676 | 0.82 | 0.6481 | 0.5690 | 1.2214 | 0.9972 | 0.9981 | 1.0302 |
| 2395 |                          | 2-docosahexaenoylglycerol (22:6)*                            | LC/MS neg      | 32506 |                        | <a href="#">HMDB11557</a> |         | 0.94 | 0.7965 | 0.6038 | 0.8806 | 0.8238 | 0.8784 | 0.7997 |
| 2402 |                          | 1-dihomo-linoleoylglycerol (20:2)                            | LC/MS neg      | 48675 |                        |                           |         | 0.48 | 0.0587 | 0.2220 | 1.3005 | 0.8233 | 0.6922 | 0.7108 |
| 2404 |                          | diacylglycerol (12:0/18:1, 14:0/16:1, 16:0/14:1) [2]*        | LC/MS pos late | 35103 |                        |                           |         | 2.48 | 0.7736 | 0.5995 | 1.2698 | 3.1475 | 3.0311 | 5.1151 |
| 2405 |                          | diacylglycerol (14:0/18:1, 16:0/16:1) [1]*                   | LC/MS pos late | 55001 |                        |                           |         | 1.26 | 0.7159 | 0.5865 | 2.0776 | 2.8237 | 2.7679 | 3.7978 |
| 2406 |                          | diacylglycerol (14:0/18:1, 16:0/16:1) [2]*                   | LC/MS pos late | 54953 |                        |                           |         | 1.41 | 0.8994 | 0.6250 | 1.8308 | 2.5862 | 2.6854 | 3.7466 |
| 2407 |                          | diacylglycerol (16:1/18:2 [2], 16:0/18:3 [1])*               | LC/MS pos late | 54954 |                        |                           |         | 0.86 | 0.5641 | 0.5475 | 1.2690 | 1.0969 | 1.1928 | 1.2399 |
| 2418 |                          | palmitoyl-palmitoyl-glycerol (16:0/16:0) [1]*                | LC/MS pos late | 54966 |                        | <a href="#">HMDB07098</a> |         | 1.90 | 0.6267 | 0.5658 | 0.8967 | 1.7060 | 1.6174 | 2.7092 |
| 2419 |                          | palmitoyl-palmitoyl-glycerol (16:0/16:0) [2]*                | LC/MS pos late | 54991 |                        | <a href="#">HMDB07098</a> |         | 1.89 | 0.8434 | 0.6073 | 1.3431 | 2.5391 | 2.4086 | 4.0550 |
| 2422 |                          | palmitoyl-oleoyl-glycerol (16:0/18:1) [1]*                   | LC/MS pos late | 54990 | <a href="#">C13861</a> | <a href="#">HMDB07102</a> |         | 1.07 | 0.9923 | 0.6500 | 1.5379 | 1.6480 | 1.6826 | 1.9889 |
| 2423 |                          | palmitoyl-oleoyl-glycerol (16:0/18:1) [2]*                   | LC/MS pos late | 54943 | <a href="#">C13861</a> | <a href="#">HMDB07102</a> |         | 1.07 | 0.9572 | 0.6386 | 1.5294 | 1.6337 | 1.6762 | 1.9959 |
| 2424 |                          | palmitoyl-linoleoyl-glycerol (16:0/18:2) [1]*                | LC/MS pos late | 54942 |                        | <a href="#">HMDB07103</a> | 9543695 | 0.82 | 0.8301 | 0.6058 | 1.5512 | 1.2735 | 1.2038 | 1.2319 |
| 2425 |                          | palmitoyl-linoleoyl-glycerol (16:0/18:2) [2]*                | LC/MS pos late | 52633 |                        | <a href="#">HMDB07103</a> |         | 0.96 | 0.9569 | 0.6386 | 1.4123 | 1.3510 | 1.3567 | 1.5190 |
| 2427 |                          | palmitoleoyl-oleoyl-glycerol (16:1/18:1) [1]*                | LC/MS pos late | 52634 |                        | <a href="#">HMDB07131</a> | 9543694 | 0.83 | 0.5634 | 0.5475 | 1.5567 | 1.2928 | 1.5048 | 1.4511 |
| 2428 |                          | palmitoleoyl-oleoyl-glycerol (16:1/18:1) [2]*                | LC/MS pos late | 52632 |                        |                           |         | 0.79 | 0.6313 | 0.5662 | 1.7245 | 1.3576 | 1.4836 | 1.2699 |
| 2429 |                          | palmitoleoyl-linoleoyl-glycerol (16:1/18:2) [1]*             | LC/MS pos late | 52631 |                        | <a href="#">HMDB07132</a> |         | 0.76 | 0.4022 | 0.4811 | 1.2945 | 0.9865 | 1.0888 | 1.0469 |
| 2431 |                          | palmitoyl-arachidonoyl-glycerol (16:0/20:4) [1]*             | LC/MS pos late | 54967 |                        | <a href="#">HMDB07112</a> |         | 0.90 | 0.7970 | 0.6033 | 1.7011 | 1.5378 | 1.5487 | 1.9204 |
| 2432 |                          | palmitoyl-arachidonoyl-glycerol (16:0/20:4) [2]*             | LC/MS pos late | 54957 |                        | <a href="#">HMDB07112</a> |         | 0.79 | 0.9216 | 0.6285 | 2.0127 | 1.8657 | 1.7124 | 1.7595 |
| 2433 |                          | palmitoleoyl-arachidonoyl-glycerol (16:1/20:4) [2]*          | LC/MS pos late | 54958 |                        |                           |         | 0.82 | 0.6158 | 0.5637 | 1.2800 | 1.0523 | 1.2447 | 0.9737 |
| 2440 |                          | oleoyl-oleoyl-glycerol (18:1/18:1) [1]*                      | LC/MS pos late | 57406 |                        | <a href="#">HMDB07218</a> |         | 0.83 | 0.4525 | 0.5027 | 1.3871 | 1.1461 | 1.1992 | 1.1000 |
| 2441 |                          | oleoyl-oleoyl-glycerol (18:1/18:1) [2]*                      | LC/MS pos late | 54945 |                        | <a href="#">HMDB07218</a> |         | 0.81 | 0.4821 | 0.5126 | 1.3772 | 1.1214 | 1.1922 | 1.0783 |
| 2443 |                          | oleoyl-linoleoyl-glycerol (18:1/18:2) [1]                    | LC/MS pos late | 54946 |                        | <a href="#">HMDB07219</a> |         | 0.70 | 0.1503 | 0.3419 | 1.5813 | 1.1107 | 1.1343 | 1.0221 |
| 2444 |                          | oleoyl-linoleoyl-glycerol (18:1/18:2) [2]                    | LC/MS pos late | 46798 |                        | <a href="#">HMDB07219</a> |         | 0.76 | 0.3578 | 0.4591 | 1.4330 | 1.0827 | 1.1217 | 0.9967 |
| 2448 |                          | linoleoyl-linoleoyl-glycerol (18:2/18:2) [1]*                | LC/MS pos late | 46799 |                        | <a href="#">HMDB07248</a> |         | 0.65 | 0.1633 | 0.3488 | 1.5487 | 1.0143 | 1.0206 | 0.9614 |
| 2450 |                          | linoleoyl-linoleoyl-glycerol (18:2/18:3) [1]*                | LC/MS pos late | 54938 |                        | <a href="#">HMDB07249</a> |         | 0.48 | 0.0281 | 0.1494 | 2.0766 | 0.9954 | 1.0255 | 0.8893 |
| 2454 |                          | stearoyl-arachidonoyl-glycerol (18:0/20:4) [1]*              | LC/MS pos late | 54963 |                        |                           |         | 0.92 | 0.9618 | 0.6395 | 1.2177 | 1.1262 | 1.1280 | 1.0195 |
| 2455 |                          | stearoyl-arachidonoyl-glycerol (18:0/20:4) [2]*              | LC/MS pos late | 57450 |                        |                           |         | 0.90 | 0.4005 | 0.4811 | 1.1080 | 0.9928 | 1.0232 | 0.9189 |
| 2456 |                          | oleoyl-arachidonoyl-glycerol (18:1/20:4) [1]*                | LC/MS pos late | 57449 |                        | <a href="#">HMDB07228</a> |         | 0.82 | 0.8276 | 0.6058 | 1.2611 | 1.0396 | 1.0896 | 1.0263 |
| 2457 |                          | oleoyl-arachidonoyl-glycerol (18:1/20:4) [2]*                | LC/MS pos late | 54960 |                        | <a href="#">HMDB07228</a> |         | 0.83 | 0.8431 | 0.6073 | 1.2543 | 1.0457 | 1.1164 | 1.0472 |
| 2458 |                          | linoleoyl-arachidonoyl-glycerol (18:2/20:4) [1]*             | LC/MS pos late | 54961 |                        | <a href="#">HMDB07257</a> |         | 0.69 | 0.2618 | 0.4196 | 1.4182 | 0.9849 | 1.0650 | 0.9058 |
| 2459 |                          | linoleoyl-arachidonoyl-glycerol (18:2/20:4) [2]*             | LC/MS pos late | 54955 |                        | <a href="#">HMDB07257</a> |         | 0.72 | 0.9812 | 0.6459 | 1.3319 | 0.9600 | 1.0390 | 0.9635 |
| 2462 |                          | linoleoyl-docosahexaenoyl-glycerol (18:2/22:6) [1]*          | LC/MS pos late | 54956 |                        |                           |         | 0.72 | 0.2871 | 0.4347 | 1.2598 | 0.9037 | 0.9801 | 1.0239 |
| 2486 |                          | sphinganine                                                  | LC/MS pos late | 54949 | <a href="#">C00836</a> | <a href="#">HMDB00269</a> | 3126    | 1.17 | 0.0226 | 0.1329 | 0.9378 | 1.1002 | 1.0593 | 1.1861 |
| 2487 | Sphingolipid Synthesis   | sphinganine-1-phosphate                                      | LC/MS pos late | 17789 |                        | <a href="#">HMDB01383</a> | 520     | 1.35 | 0.0211 | 0.1290 | 0.9733 | 1.3093 | 1.2620 | 1.3814 |
| 2492 |                          | N-palmitoyl-sphinganine (d18:0/16:0)                         | LC/MS pos late | 52605 |                        | <a href="#">HMDB11760</a> | 5283572 | 1.05 | 0.9327 | 0.6328 | 1.0399 | 1.0883 | 1.0710 | 1.2275 |
| 2493 | Dihydroceramides         | N-stearoyl-sphinganine (d18:0/18:0)*                         | LC/MS pos late | 52604 |                        |                           | 5283573 | 1.28 | 0.4939 | 0.5147 | 1.1687 | 1.5002 | 1.4314 | 1.8213 |
| 2500 |                          | N-palmitoyl-sphingosine (d18:1/16:0)                         | LC/MS pos late | 1759  |                        | <a href="#">HMDB04949</a> | 5283564 | 1.06 | 0.5232 | 0.5301 | 0.9871 | 1.0453 | 1.0543 | 1.1169 |
| 2503 |                          | N-stearoyl-sphingosine (d18:1/18:0)*                         | LC/MS pos late | 44877 |                        | <a href="#">HMDB04950</a> | 5283565 | 1.03 | 0.9117 | 0.6250 | 1.2215 | 1.2623 | 1.1966 | 1.4318 |
| 2509 |                          | N-palmitoyl-sphingadineine (d18:2/16:0)*                     | LC/MS pos late | 54979 |                        |                           |         | 1.18 | 0.0416 | 0.1802 | 0.9338 | 1.0993 | 1.0571 | 1.1584 |
| 2511 |                          | N-behenoyl-sphingadineine (d18:2/22:0)*                      | LC/MS pos late | 57416 |                        |                           |         | 0.83 | 0.6158 | 0.5637 | 1.1628 | 0.9628 | 0.9584 | 0.9463 |
| 2512 |                          | N-nervonyl-sphingadiene (d18:2/24:1)*                        | LC/MS pos late | 57372 |                        |                           |         | 0.92 | 0.7534 | 0.5938 | 1.1330 | 1.0424 | 1.0394 | 1.0975 |
| 2520 |                          | N-nervonyl-hexadecylsphingosine (d18:1/24:1)*                | LC/MS pos late | 57442 |                        |                           |         | 0.82 | 0.2831 | 0.4336 | 1.1482 | 0.9440 | 0.9968 | 0.9805 |
| 2525 |                          | ceramide (d18:1/14:0, d16:1/16:0)*                           | LC/MS pos late | 57435 |                        |                           |         | 1.11 | 0.3343 | 0.4524 | 0.9920 | 1.1037 | 1.1065 | 1.2301 |
| 2526 |                          | ceramide (d18:1/17:0, d17:1/18:0)*                           | LC/MS pos late | 57432 |                        |                           |         | 1.08 | 0.4620 | 0.5047 | 1.1938 | 1.2841 | 1.2198 | 1.4756 |
| 2528 |                          | ceramide (d18:1/20:0, d16:1/22:0, d20:1/18:0)*               | LC/MS pos late | 57434 |                        |                           |         | 0.91 | 0.5840 | 0.5529 | 1.1204 | 1.0153 | 1.0158 | 0.9952 |
| 2534 |                          | glycosyl-N-palmitoyl-sphingosine (d18:1/16:0)                | LC/MS pos late | 57440 |                        |                           |         | 1.20 | 0.2557 | 0.4195 | 0.9500 | 1.1430 | 1.1676 | 1.1602 |
| 2535 |                          | glycosyl-N-stearoyl-sphingosine (d18:1/18:0)                 | LC/MS pos late | 53013 |                        |                           |         | 1.07 | 0.6338 | 0.5662 | 1.0186 | 1.0873 | 1.0863 | 1.0799 |
| 2541 |                          | glycosyl-N-(2-hydroxynervonyl)-sphingosine (d18:1/24:1(2OH)) | LC/MS pos late | 52234 |                        |                           |         | 0.94 | 0.9181 | 0.6278 | 1.1241 | 1.0578 | 1.0584 | 1.1028 |
| 2555 |                          | glycosyl ceramide (d18:1/20:0, d16:1/22:0)*                  | LC/MS pos late | 57444 |                        |                           |         | 1.11 | 0.4630 | 0.5047 | 0.9772 | 1.0865 | 1.0634 | 1.0798 |
| 2559 |                          | glycosyl ceramide (d18:2/24:1, d18:1/24:2)*                  | LC/MS pos late | 57595 |                        |                           |         | 1.09 | 0.6881 | 0.5810 | 1.0261 | 1.1233 | 1.1451 | 1.1203 |
| 2561 |                          | lactosyl-N-palmitoyl-sphingosine (d18:1/16:0)                | LC/MS pos late | 57453 |                        |                           |         | 1.24 | 0.0163 | 0.1152 | 0.9233 | 1.1431 | 1.1290 | 1.2045 |
| 2565 | Lactosylceramides (LCER) | lactosyl-N-nervonyl-sphingosine (d18:1/24:1)*                | LC/MS pos late | 53010 |                        |                           |         | 1.30 | 0.0598 | 0.2248 | 0.9561 | 1.2466 | 1.2328 | 1.2332 |
| 2572 |                          | myristoyl dihydrosphingomyelin (d18:0/14:0)*                 | LC/MS pos late | 57370 |                        | <a href="#">HMDB12085</a> |         | 1.17 | 0.2752 | 0.4302 | 0.9055 | 1.0559 | 1.0590 | 1.1279 |
| 2573 |                          | palmitoyl dihydrosphingomyelin (d18:0/16:0)*                 | LC/MS pos late | 57365 |                        |                           | 9909965 | 1.10 | 0.3527 | 0.4591 | 0.9551 | 1.0513 | 1.0642 | 1.1033 |

|      |                       |                                                                 |                |       |                        |                           |          |      |        |        |        |        |        |        |
|------|-----------------------|-----------------------------------------------------------------|----------------|-------|------------------------|---------------------------|----------|------|--------|--------|--------|--------|--------|--------|
| 2574 | Dihydrospingomyelins  | behenoyl dihydrospingomyelin (d18:0/22:0)*                      | LC/MS pos late | 52434 |                        | <a href="#">HMDB12091</a> |          | 1.06 | 0.8036 | 0.6040 | 1.1163 | 1.1792 | 1.2150 | 1.2056 |
| 2575 |                       | sphingomyelin (d18:0/18:0, d19:0/17:0)*                         | LC/MS pos late | 57331 |                        | <a href="#">HMDB12087</a> |          | 1.11 | 0.7555 | 0.5938 | 1.0579 | 1.1772 | 1.1654 | 1.2963 |
| 2576 |                       | sphingomyelin (d18:0/20:0, d16:0/22:0)*                         | LC/MS pos late | 57473 |                        |                           |          | 1.15 | 0.7905 | 0.6033 | 1.1274 | 1.2931 | 1.3176 | 1.4794 |
| 2577 |                       | palmitoyl sphingomyelin (d18:1/16:0)                            | LC/MS pos late | 57476 |                        |                           | 9039941  | 1.05 | 0.3900 | 0.4792 | 0.9767 | 1.0275 | 1.0278 | 1.0292 |
| 2579 |                       | stearoyl sphingomyelin (d18:1/18:0)                             | LC/MS pos late | 37506 | <a href="#">C00550</a> | <a href="#">HMDB01348</a> | 6453725  | 0.96 | 0.6372 | 0.5662 | 1.0551 | 1.0165 | 0.9975 | 1.0232 |
| 2580 |                       | behenoyl sphingomyelin (d18:1/22:0)*                            | LC/MS pos late | 19503 |                        | <a href="#">HMDB12103</a> |          | 1.09 | 0.3925 | 0.4792 | 0.9776 | 1.0691 | 1.0741 | 1.1008 |
| 2581 |                       | tricosanoyl sphingomyelin (d18:1/23:0)*                         | LC/MS pos late | 48492 |                        | <a href="#">HMDB12105</a> |          | 1.13 | 0.4670 | 0.5051 | 0.9792 | 1.1053 | 1.1025 | 1.1548 |
| 2582 |                       | lignoceroyl sphingomyelin (d18:1/24:0)                          | LC/MS pos late | 52436 |                        |                           |          | 1.09 | 0.6401 | 0.5662 | 1.0141 | 1.1016 | 1.1134 | 1.1314 |
| 2583 |                       | sphingomyelin (d18:2/18:1)*                                     | LC/MS pos late | 57330 |                        |                           |          | 1.13 | 0.3367 | 0.4524 | 1.0035 | 1.1310 | 1.0851 | 1.0324 |
| 2584 |                       | sphingomyelin (d18:2/23:1)*                                     | LC/MS pos late | 57474 |                        |                           |          | 1.06 | 0.7434 | 0.5933 | 1.0005 | 1.0572 | 1.0601 | 1.1079 |
| 2585 |                       | sphingomyelin (d18:2/24:2)*                                     | LC/MS pos late | 57482 |                        |                           |          | 0.97 | 0.6261 | 0.5656 | 1.0118 | 0.9818 | 0.9550 | 0.9666 |
| 2587 |                       | sphingomyelin (d18:1/14:0, d16:1/16:0)*                         | LC/MS pos late | 57479 |                        | <a href="#">HMDB12097</a> | 1143362  | 1.03 | 0.6201 | 0.5637 | 0.9869 | 1.0157 | 1.0329 | 1.0080 |
| 2588 |                       | sphingomyelin (d18:2/14:0, d16:1/14:1)*                         | LC/MS pos late | 42463 |                        |                           |          | 1.02 | 0.7070 | 0.5845 | 1.0375 | 1.0570 | 1.0440 | 1.0689 |
| 2589 |                       | sphingomyelin (d17:1/16:0, d18:1/15:0, d16:1/17:0)*             | LC/MS pos late | 47154 |                        |                           |          | 1.05 | 0.5267 | 0.5310 | 1.0302 | 1.0811 | 1.0669 | 1.1130 |
| 2590 |                       | sphingomyelin (d17:2/16:0, d18:2/15:0)*                         | LC/MS pos late | 52433 |                        |                           |          | 1.05 | 0.6005 | 0.5629 | 0.9826 | 1.0308 | 1.0314 | 1.0353 |
| 2591 |                       | sphingomyelin (d18:2/16:0, d18:1/16:1)*                         | LC/MS pos late | 57483 |                        |                           |          | 1.06 | 0.4433 | 0.4988 | 1.0188 | 1.0761 | 1.0575 | 0.9809 |
| 2592 | Sphingomyelins        | sphingomyelin (d18:1/17:0, d17:1/18:0, d19:1/16:0)              | LC/MS pos late | 42459 |                        |                           |          | 1.01 | 0.8142 | 0.6058 | 0.9905 | 1.0045 | 0.9895 | 1.0451 |
| 2593 |                       | sphingomyelin (d18:1/18:1, d18:2/18:0)                          | LC/MS pos late | 52615 |                        | <a href="#">HMDB12101</a> | 644382   | 1.00 | 0.9738 | 0.6446 | 1.1095 | 1.1045 | 1.0618 | 1.0713 |
| 2594 |                       | sphingomyelin (d18:1/19:0, d19:1/18:0)*                         | LC/MS pos late | 37529 |                        |                           |          | 1.04 | 0.8324 | 0.6058 | 1.0334 | 1.0750 | 1.0624 | 1.1189 |
| 2595 |                       | sphingomyelin (d18:1/20:0, d16:1/22:0)*                         | LC/MS pos late | 57475 |                        | <a href="#">HMDB12102</a> |          | 0.98 | 0.7147 | 0.5865 | 1.0379 | 1.0211 | 1.0126 | 1.0289 |
| 2596 |                       | sphingomyelin (d18:1/22:1, d18:2/20:0)*                         | LC/MS pos late | 48490 |                        |                           |          | 0.98 | 0.7267 | 0.5865 | 1.0483 | 1.0262 | 0.9941 | 1.0001 |
| 2597 |                       | sphingomyelin (d18:1/20:2, d18:2/20:1, d16:1/22:2)*             | LC/MS pos late | 48491 |                        |                           |          | 0.94 | 0.4411 | 0.4984 | 1.1203 | 1.0498 | 0.9979 | 0.9791 |
| 2598 |                       | sphingomyelin (d18:1/21:0, d17:1/22:0, d16:1/23:0)*             | LC/MS pos late | 57481 |                        |                           |          | 1.07 | 0.6972 | 0.5837 | 1.0359 | 1.1073 | 1.1264 | 1.1462 |
| 2599 |                       | sphingomyelin (d18:2/21:0, d16:2/23:0)*                         | LC/MS pos late | 52465 |                        |                           |          | 1.05 | 0.6966 | 0.5837 | 1.0186 | 1.0735 | 1.0734 | 1.0873 |
| 2600 |                       | sphingomyelin (d18:1/22:1, d18:2/22:0, d16:1/24:1)*             | LC/MS pos late | 57480 |                        | <a href="#">HMDB12104</a> |          | 0.95 | 0.4186 | 0.4904 | 1.0310 | 0.9621 | 0.9970 | 0.9519 |
| 2601 |                       | sphingomyelin (d18:1/22:2, d18:2/22:1, d16:1/24:2)*             | LC/MS pos late | 48493 |                        |                           |          | 0.97 | 0.5999 | 0.5478 | 0.9765 | 0.9489 | 0.9512 | 0.9809 |
| 2602 |                       | sphingomyelin (d18:2/23:0, d18:1/23:1, d17:1/24:1)*             | LC/MS pos late | 57477 |                        |                           |          | 1.08 | 0.5350 | 0.5359 | 0.9985 | 1.0791 | 1.0861 | 1.0856 |
| 2603 |                       | sphingomyelin (d18:1/24:1, d18:2/24:0)*                         | LC/MS pos late | 52435 |                        | <a href="#">HMDB12107</a> |          | 0.98 | 0.6887 | 0.5810 | 1.0083 | 0.9922 | 1.0023 | 0.9951 |
| 2604 |                       | sphingomyelin (d18:2/24:1, d18:1/24:2)*                         | LC/MS pos late | 47153 |                        |                           |          | 0.99 | 0.6410 | 0.5662 | 1.0205 | 1.0057 | 1.0019 | 1.0009 |
| 2605 |                       | sphingomyelin (d18:1/25:0, d19:0/24:1, d20:1/23:0, d19:1/24:0)* | LC/MS pos late | 52437 |                        |                           |          | 1.04 | 0.8370 | 0.6058 | 1.0097 | 1.0464 | 1.0203 | 1.0518 |
| 2606 | Sphingosines          | sphingosine                                                     | LC/MS pos late | 57478 | <a href="#">C00319</a> | <a href="#">HMDB00252</a> | 5353955  | 1.27 | 0.0308 | 0.1527 | 0.9104 | 1.1546 | 1.1026 | 1.2396 |
| 2608 |                       | sphingosine 1-phosphate                                         | LC/MS polar    | 17747 | <a href="#">C06124</a> | <a href="#">HMDB00277</a> | 5283560  | 1.17 | 0.0961 | 0.2782 | 0.9432 | 1.1035 | 1.0892 | 1.1229 |
| 2622 | Mevalonate Metabolism | 3-hydroxy-3-methylglutarate                                     | LC/MS polar    | 34445 | <a href="#">C03761</a> | <a href="#">HMDB00355</a> | 1682     | 1.04 | 0.7198 | 0.5865 | 1.2755 | 1.3210 | 1.2700 | 1.1019 |
| 2637 |                       | cholesterol                                                     | LC/MS pos late | 531   | <a href="#">C00187</a> | <a href="#">HMDB00067</a> | 11025406 | 1.05 | 0.7708 | 0.5991 | 1.0236 | 1.0714 | 1.1033 | 1.1279 |
| 2648 |                       | 7-alpha-hydroxy-3-oxo-4-cholestenone (7-Hcca)                   | LC/MS neg      | 63    | <a href="#">C17337</a> | <a href="#">HMDB12458</a> | 3081085  | 1.27 | 0.0109 | 0.0987 | 1.0499 | 1.3307 | 1.2354 | 1.2101 |
| 2650 |                       | 3beta,7alpha-dihydroxy-5-cholestenone                           | LC/MS neg      | 36776 | <a href="#">C17335</a> |                           | 3081084  | 1.01 | 0.7074 | 0.5845 | 1.0356 | 1.0482 | 0.9892 | 0.9445 |
| 2651 | Sterol                | 3beta-hydroxy-5-cholestenone                                    | LC/MS neg      | 36803 | <a href="#">C17333</a> |                           | 165511   | 1.33 | 0.0258 | 0.1424 | 0.9690 | 1.2887 | 1.2171 | 1.2180 |
| 2661 |                       | 4-cholesten-3-one                                               | LC/MS pos late | 54805 | <a href="#">C00599</a> | <a href="#">HMDB00921</a> | 91477    | 0.91 | 0.3410 | 0.4524 | 1.1336 | 1.0326 | 1.0599 | 1.0383 |
| 2662 |                       | beta-sitosterol                                                 | LC/MS pos late | 38125 | <a href="#">C01753</a> | <a href="#">HMDB00852</a> | 222284   | 1.52 | 0.0725 | 0.2494 | 0.8499 | 1.2938 | 1.1985 | 1.1012 |
| 2664 |                       | campesterol                                                     | LC/MS pos late | 27414 | <a href="#">C01789</a> | <a href="#">HMDB02869</a> | 173183   | 1.41 | 0.1774 | 0.3574 | 0.9721 | 1.3730 | 1.3289 | 1.1448 |
| 2683 |                       | pregnenolone sulfate                                            | LC/MS neg      | 33997 |                        | <a href="#">HMDB00774</a> | 160574   | 0.85 | 0.1938 | 0.3668 | 1.3918 | 1.1881 | 1.1007 | 1.0289 |
| 2687 |                       | 17alpha-hydroxypregnenolone 3-sulfate                           | LC/MS neg      | 38170 |                        | <a href="#">HMDB00416</a> | 152971   | 0.74 | 0.1804 | 0.3620 | 1.1398 | 0.8425 | 0.7945 | 0.8301 |
| 2693 | Pregnenolone Steroids | 21-hydroxypregnenolone disulfate                                | LC/MS neg      | 37482 |                        |                           | 134595   | 0.95 | 0.5259 | 0.5310 | 1.1942 | 1.1377 | 1.1433 | 0.9416 |
| 2699 |                       | pregnenediol sulfate (C21H34O5S)*                               | LC/MS neg      | 46115 |                        |                           |          | 0.89 | 0.2810 | 0.4338 | 1.2941 | 1.1434 | 1.0874 | 1.0409 |
| 2700 |                       | pregnenediol disulfate (C21H34O6S2)*                            | LC/MS neg      | 32619 |                        |                           |          | 0.99 | 0.6886 | 0.5708 | 1.0612 | 1.0552 | 1.0081 | 0.9018 |
| 2711 |                       | Sulpha-pregnan-3beta,20beta-diol monosulfate (1)                | LC/MS neg      | 32582 |                        |                           |          | 1.63 | 0.4595 | 0.5041 | 1.4923 | 2.4394 | 2.1390 | 2.8809 |
| 2714 |                       | Sulpha-pregnan-3beta,20alpha-diol monosulfate (2)               | LC/MS neg      | 37196 |                        |                           |          | 1.61 | 0.7711 | 0.5991 | 1.3099 | 2.1094 | 1.8802 | 2.6125 |
| 2720 | Progestin Steroids    | Sulpha-pregnan-3beta,20alpha-diol disulfate                     | LC/MS neg      | 37200 |                        |                           |          | 2.18 | 0.8733 | 0.6195 | 1.3400 | 2.9194 | 2.5486 | 4.2027 |
| 2723 |                       | pregnenediol-3-glucuronide                                      | LC/MS neg      | 37198 |                        | <a href="#">HMDB10318</a> | 123796   | 1.43 | 0.9089 | 0.6250 | 1.6706 | 2.3880 | 2.2053 | 2.8656 |
| 2728 |                       | pregnenolone/allopregnenolone sulfate                           | LC/MS neg      | 40708 |                        |                           |          | 1.46 | 0.8151 | 0.6058 | 1.0769 | 1.5721 | 1.3833 | 1.7759 |
| 2737 |                       | corticosterone                                                  | LC/MS neg      | 48394 | <a href="#">C02140</a> | <a href="#">HMDB01547</a> | 5753     | 0.71 | 0.5107 | 0.5251 | 1.1600 | 0.8192 | 0.8170 | 0.8281 |
| 2742 | Corticosteroids       | cortisol                                                        | LC/MS neg      | 5983  | <a href="#">C00735</a> | <a href="#">HMDB00063</a> | 5754     | 0.80 | 0.2425 | 0.4106 | 1.2109 | 0.9709 | 0.9965 | 0.9195 |
| 2744 |                       | cortisone                                                       | LC/MS neg      | 1712  | <a href="#">C00762</a> | <a href="#">HMDB02802</a> | 222796   | 0.94 | 0.5014 | 0.5199 | 1.0293 | 0.9662 | 0.9993 | 0.9610 |
| 2747 |                       | tetrahydrocortisone                                             | LC/MS neg      | 1769  | <a href="#">C05470</a> | <a href="#">HMDB00903</a> | 5966     | 0.88 | 0.4405 | 0.4984 | 0.8534 | 0.7477 | 0.6793 | 0.8344 |



|      |                        |                                            |                                    |                 |       |                        |                           |          |      |        |        |        |        |        |        |
|------|------------------------|--------------------------------------------|------------------------------------|-----------------|-------|------------------------|---------------------------|----------|------|--------|--------|--------|--------|--------|--------|
| 3495 |                        |                                            | adenosine                          | LC/MS neg       | 2831  | <a href="#">C00212</a> | <a href="#">HMDB00050</a> | 60961    | 1.12 | 0.1210 | 0.3082 | 0.9242 | 1.0319 | 1.0190 | 1.0199 |
| 3496 |                        |                                            | adenine                            | LC/MS pos early | 555   | <a href="#">C00147</a> | <a href="#">HMDB00034</a> | 190      | 0.97 | 0.7353 | 0.5888 | 1.0499 | 1.0214 | 0.9998 | 1.0339 |
| 3501 |                        | Purine Metabolism, Adenine containing      | N1-methyladenosine                 | LC/MS pos early | 554   | <a href="#">C02494</a> | <a href="#">HMDB03331</a> | 27476    | 0.94 | 0.4941 | 0.5147 | 1.0227 | 0.9631 | 0.9699 | 0.8913 |
| 3502 |                        |                                            | N6-methyladenosine                 | LC/MS pos early | 15650 |                        | <a href="#">HMDB04044</a> | 1869     | 1.28 | 0.0172 | 0.1182 | 0.9464 | 1.2076 | 1.1467 | 1.2526 |
| 3511 |                        |                                            | N6-carbamoylthreonyladenosine      | LC/MS neg       | 37114 |                        | <a href="#">HMDB41623</a> | 161496   | 1.02 | 0.6254 | 0.5658 | 1.0795 | 1.0990 | 1.0729 | 0.9584 |
| 3521 |                        |                                            | N6-succinyladenosine               | LC/MS neg       | 35157 |                        | <a href="#">HMDB00912</a> | 165243   | 1.06 | 0.4839 | 0.5126 | 1.1063 | 1.1709 | 1.1509 | 1.0474 |
| 3529 |                        |                                            | guanosine                          | LC/MS neg       | 48130 | <a href="#">C00387</a> | <a href="#">HMDB00133</a> | 6802     | 0.68 | 0.3617 | 0.4613 | 1.3899 | 0.9434 | 1.1128 | 1.2316 |
| 3532 |                        | Purine Metabolism, Guanine containing      | 7-methylguanine                    | LC/MS pos early | 1573  | <a href="#">C02242</a> | <a href="#">HMDB00897</a> | 11361    | 0.94 | 0.4857 | 0.5126 | 1.0497 | 0.9878 | 0.9872 | 0.9220 |
| 3536 |                        |                                            | N2N2-dimethylguanosine             | LC/MS pos early | 35114 |                        | <a href="#">HMDB04824</a> | 92919    | 0.97 | 0.7964 | 0.6033 | 1.0877 | 1.0520 | 1.0441 | 0.9971 |
| 3550 | Nucleotide             |                                            | dihydroorotate                     | LC/MS polar     | 35137 | <a href="#">C00337</a> | <a href="#">HMDB03349</a> | 648      | 0.83 | 0.2947 | 0.4397 | 1.3086 | 1.0920 | 1.0897 | 0.9845 |
| 3551 |                        | Pyrimidine Metabolism, Orotate containing  | orotate                            | LC/MS polar     | 601   | <a href="#">C00295</a> | <a href="#">HMDB00226</a> | 967      | 0.72 | 0.2752 | 0.4302 | 1.4380 | 1.0411 | 1.0147 | 0.9565 |
| 3553 |                        |                                            | orotidine                          | LC/MS polar     | 1505  |                        | <a href="#">HMDB00788</a> | 92751    | 0.27 | 0.3684 | 0.4613 | 4.1643 | 1.1039 | 1.0625 | 0.9848 |
| 3563 |                        |                                            | uridine                            | LC/MS neg       | 35172 | <a href="#">C00299</a> | <a href="#">HMDB00296</a> | 6029     | 1.13 | 0.0296 | 0.1494 | 0.9559 | 1.0830 | 1.0585 | 1.0076 |
| 3564 |                        |                                            | uracil                             | LC/MS polar     | 606   | <a href="#">C00106</a> | <a href="#">HMDB00300</a> | 1174     | 1.36 | 0.0001 | 0.0039 | 0.8620 | 1.1748 | 1.1373 | 1.1408 |
| 3565 |                        |                                            | isoadouridine                      | LC/MS neg       | 605   | <a href="#">C02067</a> | <a href="#">HMDB00767</a> | 15047    | 0.92 | 0.5380 | 0.5248 | 1.1482 | 1.0614 | 1.0521 | 0.9880 |
| 3568 |                        | Pyrimidine Metabolism, Uracil containing   | 5-methyluridine (ribothymidine)    | LC/MS neg       | 33442 |                        | <a href="#">HMDB00884</a> | 445408   | 1.02 | 0.6614 | 0.5708 | 1.0289 | 1.0524 | 1.0066 | 1.0111 |
| 3579 |                        |                                            | Z-deoxyuridine                     | LC/MS neg       | 35136 | <a href="#">C00526</a> | <a href="#">HMDB00012</a> | 13712    | 1.48 | 0.0038 | 0.6038 | 0.9370 | 1.3152 | 1.2803 | 1.1564 |
| 3582 |                        |                                            | 3-ureidopropionate                 | LC/MS pos early | 1412  | <a href="#">C02642</a> | <a href="#">HMDB00026</a> | 111      | 1.14 | 0.3073 | 0.4461 | 0.9857 | 1.1280 | 1.1128 | 1.1502 |
| 3583 |                        |                                            | beta-alanine                       | LC/MS pos early | 3155  | <a href="#">C00099</a> | <a href="#">HMDB00056</a> | 239      | 1.06 | 0.2533 | 0.4195 | 0.9648 | 1.0273 | 1.0211 | 1.0325 |
| 3584 |                        |                                            | N-acetyl-beta-alanine              | LC/MS neg       | 55    | <a href="#">C01073</a> |                           | 76406    | 1.14 | 0.0997 | 0.2819 | 0.9713 | 1.1057 | 1.0371 | 1.0837 |
| 3594 |                        |                                            | cytidine                           | LC/MS neg       | 37432 | <a href="#">C00475</a> | <a href="#">HMDB00089</a> | 6175     | 0.75 | 0.1449 | 0.3340 | 1.2147 | 0.9107 | 0.9222 | 0.8597 |
| 3595 |                        | Pyrimidine Metabolism, Cytidine containing | cytosine                           | LC/MS pos early | 514   | <a href="#">C00380</a> | <a href="#">HMDB00630</a> | 597      | 0.75 | 0.6907 | 0.5810 | 1.5359 | 1.1585 | 1.0775 | 1.2103 |
| 3596 |                        |                                            | 3-methylcytidine                   | LC/MS pos early | 573   |                        |                           | 159649   | 1.00 | 0.9738 | 0.6446 | 1.0539 | 1.0497 | 1.0292 | 1.0320 |
| 3598 |                        |                                            | N4-acetylcytidine                  | LC/MS neg       | 35132 |                        | <a href="#">HMDB05923</a> | 107461   | 0.79 | 0.4866 | 0.5126 | 1.0030 | 0.7959 | 0.8159 | 0.6889 |
| 3605 |                        |                                            | Z-O-methylcytidine                 | LC/MS pos early | 35130 |                        |                           | 150971   | 0.99 | 0.8301 | 0.6058 | 1.0119 | 0.9990 | 0.9817 | 0.9759 |
| 3617 |                        | Pyrimidine Metabolism, Thymine containing  | 5,6-dihydrothymine                 | LC/MS neg       | 57564 | <a href="#">C00906</a> | <a href="#">HMDB00079</a> | 93556    | 1.19 | 0.1626 | 0.3488 | 0.8936 | 1.0610 | 1.0661 | 0.9840 |
| 3619 |                        |                                            | 3-aminoisobutyrate                 | LC/MS pos early | 1418  | <a href="#">C05145</a> | <a href="#">HMDB03911</a> | 64956    | 1.33 | 0.3347 | 0.4524 | 1.2128 | 1.6123 | 1.5703 | 1.6859 |
| 3637 |                        |                                            | quinoline                          | LC/MS pos early | 1566  | <a href="#">C03722</a> | <a href="#">HMDB00232</a> | 1066     | 1.29 | 0.3545 | 0.4591 | 1.0201 | 1.3115 | 1.2745 | 1.3055 |
| 3641 |                        |                                            | nicotinamide                       | LC/MS pos early | 1899  | <a href="#">C00153</a> | <a href="#">HMDB01406</a> | 936      | 1.10 | 0.3654 | 0.4613 | 0.9815 | 1.0802 | 1.0501 | 0.9746 |
| 3653 |                        | Nicotinate and Nicotinamide Metabolism     | 1-methylnicotinamide               | LC/MS pos early | 594   | <a href="#">C02918</a> | <a href="#">HMDB00699</a> | 10129685 | 1.04 | 0.9039 | 0.6250 | 1.0797 | 1.1254 | 1.1657 | 0.8960 |
| 3658 |                        |                                            | trigonelline (N'-methylnicotinate) | LC/MS pos early | 27665 | <a href="#">C01004</a> | <a href="#">HMDB00875</a> | 5570     | 0.25 | 0.0000 | 0.0012 | 2.6560 | 0.6687 | 0.6092 | 0.5311 |
| 3660 |                        |                                            | N1-Methyl-2-pyridone-5-carboxamide | LC/MS pos early | 32401 | <a href="#">C05842</a> | <a href="#">HMDB04193</a> | 69608    | 1.11 | 0.3207 | 0.4524 | 1.1157 | 1.2366 | 1.2396 | 1.0792 |
| 3661 |                        |                                            | N1-Methyl-4-pyridone-3-carboxamide | LC/MS pos early | 40469 | <a href="#">C05843</a> | <a href="#">HMDB04194</a> | 440810   | 1.04 | 0.5945 | 0.5595 | 1.1335 | 1.1772 | 1.1762 | 0.9775 |
| 3665 |                        | Riboflavin Metabolism                      | riboflavin (Vitamin B2)            | LC/MS neg       | 57594 | <a href="#">C00255</a> | <a href="#">HMDB00244</a> | 493570   | 0.72 | 0.7303 | 0.5872 | 2.0914 | 1.5081 | 1.5691 | 1.5755 |
| 3668 |                        | Pantothenate and CoA Metabolism            | pantothenate                       | LC/MS neg       | 1827  | <a href="#">C00864</a> | <a href="#">HMDB00210</a> | 6613     | 1.04 | 0.9103 | 0.6250 | 1.0378 | 1.0791 | 1.0879 | 0.8751 |
| 3681 |                        |                                            | threonate                          | LC/MS polar     | 1508  | <a href="#">C01620</a> | <a href="#">HMDB00943</a> | 151152   | 1.16 | 0.1028 | 0.2856 | 0.9366 | 1.0851 | 1.0872 | 1.0301 |
| 3684 |                        | Ascorbate and Aldarate Metabolism          | oxalate (ethanedioate)             | LC/MS neg       | 27738 | <a href="#">C00209</a> | <a href="#">HMDB02329</a> | 971      | 1.10 | 0.1931 | 0.3668 | 0.9444 | 1.0383 | 1.0401 | 0.9580 |
| 3685 |                        |                                            | gulonate*                          | LC/MS polar     | 20694 | <a href="#">C00257</a> | <a href="#">HMDB03290</a> | 9794176  | 1.05 | 0.4298 | 0.4934 | 1.1075 | 1.1669 | 1.1018 | 1.0742 |
| 3687 |                        |                                            | alpha-tocopherol                   | LC/MS pos late  | 46957 | <a href="#">C02477</a> | <a href="#">HMDB01893</a> | 14985    | 0.84 | 0.0233 | 0.1341 | 1.0857 | 0.9103 | 0.9503 | 0.9157 |
| 3695 |                        |                                            | gamma-CEHC                         | LC/MS neg       | 1561  |                        | <a href="#">HMDB01931</a> | 133098   | 0.61 | 0.0043 | 0.0615 | 1.4697 | 0.8982 | 0.9574 | 0.8343 |
| 3696 |                        |                                            | gamma-CEHC glucuronide*            | LC/MS neg       | 44676 |                        |                           |          | 0.59 | 0.0889 | 0.2674 | 1.0847 | 0.6405 | 0.7828 | 0.4098 |
| 3697 |                        | Tocopherol Metabolism                      | alpha-CEHC glucuronide*            | LC/MS neg       | 42381 |                        |                           |          | 0.67 | 0.0849 | 0.2632 | 0.5580 | 0.3811 | 1.6654 | 0.3811 |
| 3698 |                        |                                            | alpha-CEHC sulfate                 | LC/MS neg       | 39346 |                        |                           |          | 0.59 | 0.1536 | 0.3451 | 1.0341 | 0.6098 | 1.3178 | 0.3678 |
| 3709 | Cofactors and Vitamins |                                            | gamma-tocopherol/beta-tocopherol   | LC/MS pos late  | 47696 |                        |                           |          | 1.02 | 0.9093 | 0.6052 | 1.0069 | 1.0255 | 0.9725 | 1.1609 |
| 3731 |                        |                                            | heme                               | LC/MS pos late  | 52473 | <a href="#">C00032</a> | <a href="#">HMDB03178</a> | 26945    | 2.55 | 0.2374 | 0.4058 | 0.6234 | 1.5919 | 1.3845 | 0.7645 |
| 3732 |                        |                                            | bilirubin (ZZ)                     | LC/MS pos late  | 41754 | <a href="#">C00486</a> | <a href="#">HMDB00054</a> | 5280352  | 1.02 | 0.9030 | 0.6250 | 0.9876 | 1.0066 | 0.9876 | 0.9585 |
| 3733 |                        |                                            | bilirubin (EE)*                    | LC/MS pos late  | 43807 |                        |                           | 5315454  | 1.06 | 0.8788 | 0.6207 | 1.0510 | 1.1114 | 1.0621 | 1.0420 |
| 3734 |                        | Hemoglobin and Porphyrin Metabolism        | bilirubin (EZ or ZE)*              | LC/MS pos late  | 32586 |                        | <a href="#">HMDB00488</a> | 5799469  | 0.97 | 0.6198 | 0.5637 | 1.0310 | 1.0050 | 1.0026 | 0.9560 |
| 3735 |                        |                                            | biliverdin                         | LC/MS pos late  | 47886 | <a href="#">C00500</a> | <a href="#">HMDB01008</a> | 5353439  | 1.56 | 0.3165 | 0.4524 | 1.2550 | 1.9605 | 1.7758 | 1.2959 |
| 3736 |                        |                                            | urobilinogen                       | LC/MS neg       | 2137  | <a href="#">C05790</a> | <a href="#">HMDB04157</a> | 26818    | 0.51 | 0.2962 | 0.4414 | 1.4816 | 0.7581 | 0.6663 | 0.5971 |
| 3738 |                        |                                            | L-urobilin                         | LC/MS pos late  | 32426 | <a href="#">C05793</a> | <a href="#">HMDB04159</a> | 5280818  | 0.90 | 0.7701 | 0.5991 | 0.6426 | 0.5782 | 0.4670 | 0.6835 |
| 3752 |                        |                                            | retinol (Vitamin A)                | LC/MS pos late  | 40173 | <a href="#">C00473</a> | <a href="#">HMDB00305</a> | 445354   | 0.92 | 0.3186 | 0.4524 | 1.0681 | 0.9819 | 0.9895 | 0.9521 |
| 3754 |                        | Vitamin A Metabolism                       | carotene diol (1)                  | LC/MS pos late  | 1806  |                        |                           |          | 1.01 | 0.8004 | 0.6038 | 1.0537 | 1.0590 | 1.0765 | 1.1388 |
| 3755 |                        |                                            | carotene diol (2)                  | LC/MS pos late  | 57635 |                        |                           |          | 1.04 | 0.5795 | 0.5503 | 0.9851 | 1.0279 | 1.0236 | 1.0792 |

|      |                       |  |                                            |                 |       |                        |                           |          |      |        |        |         |        |        |        |
|------|-----------------------|--|--------------------------------------------|-----------------|-------|------------------------|---------------------------|----------|------|--------|--------|---------|--------|--------|--------|
| 3756 |                       |  | carotene diol (3)                          | LC/MS pos late  | 57636 |                        |                           |          | 0.97 | 0.8310 | 0.6058 | 1.0064  | 0.9773 | 0.9957 | 0.9782 |
| 3758 |                       |  | beta-cryptoxanthin                         | LC/MS pos late  | 57637 |                        | <a href="#">HMDB33844</a> | 6384256  | 2.34 | 0.0617 | 0.2255 | 1.0525  | 2.4681 | 2.3271 | 2.9158 |
| 3771 | Vitamin B6 Metabolism |  | pyridoxal                                  | LC/MS pos early | 57581 | <a href="#">C00250</a> | <a href="#">HMDB01545</a> | 1050     | 0.74 | 0.1679 | 0.3488 | 2.2180  | 1.6291 | 1.6450 | 1.1880 |
| 3772 |                       |  | pyridoxate                                 | LC/MS neg       | 1651  | <a href="#">C00847</a> | <a href="#">HMDB00017</a> | 6723     | 0.64 | 0.0086 | 0.0047 | 1.7658  | 1.1264 | 1.0588 | 0.7066 |
| 3774 |                       |  | hippurate                                  | LC/MS neg       | 31555 | <a href="#">C01586</a> | <a href="#">HMDB00714</a> | 464      | 0.52 | 0.0444 | 0.1866 | 1.7410  | 0.9012 | 0.8319 | 0.8014 |
| 3778 |                       |  | 2-hydroxyhippurate (salicylurate)          | LC/MS polar     | 15783 | <a href="#">C07588</a> | <a href="#">HMDB00840</a> | 10253    | 0.27 | 0.2056 | 0.3788 | 5.0419  | 1.3677 | 1.8714 | 0.9811 |
| 3780 |                       |  | 3-hydroxyhippurate                         | LC/MS neg       | 18281 |                        | <a href="#">HMDB06116</a> | 450268   | 0.39 | 0.0039 | 0.0608 | 2.3223  | 0.8970 | 0.8607 | 0.7046 |
| 3782 |                       |  | 4-hydroxyhippurate                         | LC/MS neg       | 39600 |                        | <a href="#">HMDB13678</a> | 151012   | 1.07 | 0.9149 | 0.6284 | 1.4973  | 1.6025 | 1.5490 | 1.6561 |
| 3786 |                       |  | benzoate                                   | LC/MS neg       | 35527 | <a href="#">C00180</a> | <a href="#">HMDB01870</a> | 243      | 0.85 | 0.2604 | 0.4196 | 1.0568  | 0.8966 | 0.9161 | 0.8821 |
| 3798 |                       |  | 4-hydroxybenzoate                          | LC/MS neg       | 15778 | <a href="#">C00156</a> | <a href="#">HMDB00500</a> | 135      | 1.29 | 0.1073 | 0.2870 | 0.9218  | 1.1866 | 1.0958 | 1.2092 |
| 3806 |                       |  | catechol sulfate                           | LC/MS neg       | 21133 |                        | <a href="#">HMDB59724</a> | 3083979  | 0.62 | 0.0135 | 0.1065 | 1.3413  | 0.8290 | 0.7512 | 0.7046 |
| 3809 |                       |  | guaiacol sulfate                           | LC/MS neg       | 35320 |                        | <a href="#">HMDB60013</a> | 22473    | 0.45 | 0.0004 | 0.0143 | 1.6297  | 0.7393 | 0.6747 | 0.7122 |
| 3810 |                       |  | 3-methyl catechol sulfate (1)              | LC/MS neg       | 46111 |                        |                           |          | 0.34 | 0.0025 | 0.0552 | 3.1599  | 1.0849 | 1.0168 | 1.3579 |
| 3812 |                       |  | 4-methylcatechol sulfate                   | LC/MS neg       | 46165 |                        |                           |          | 0.85 | 0.8247 | 0.6058 | 1.4683  | 1.2517 | 1.2762 | 1.3818 |
| 3821 |                       |  | 4-acetylphenol sulfate                     | LC/MS neg       | 46146 |                        |                           | 4684006  | 0.51 | 0.0795 | 0.2552 | 1.8592  | 0.9396 | 0.8565 | 1.3965 |
| 3824 |                       |  | 4-ethylphenylsulfate                       | LC/MS neg       | 44620 | <a href="#">C13637</a> | <a href="#">HMDB62551</a> |          | 0.71 | 0.1253 | 0.3126 | 4.5771  | 3.2682 | 2.9174 | 4.9865 |
| 3825 |                       |  | 4-vinylphenol sulfate                      | LC/MS neg       | 36089 | <a href="#">C05627</a> | <a href="#">HMDB62775</a> | 6426768  | 0.73 | 0.1681 | 0.3488 | 1.7447  | 1.2811 | 1.2192 | 1.3849 |
| 3837 |                       |  | 3-methoxycatechol sulfate (1)              | LC/MS neg       | 36088 |                        |                           |          | 1.19 | 0.6539 | 0.5708 | 1.1781  | 1.4051 | 1.4577 | 1.0104 |
| 3839 |                       |  | methyl-4-hydroxybenzoate sulfate           | LC/MS neg       | 48783 |                        |                           |          | 0.46 | 0.4357 | 0.4983 | 3.4117  | 1.5594 | 1.9804 | 1.5227 |
| 3840 |                       |  | propyl 4-hydroxybenzoate                   | LC/MS neg       | 48429 | <a href="#">D01422</a> | <a href="#">HMDB32574</a> | 7175     | 0.97 | 0.8615 | 0.6152 | 1.0857  | 1.0572 | 1.0284 | 1.0633 |
| 3841 |                       |  | propyl 4-hydroxybenzoate sulfate           | LC/MS neg       | 48480 |                        |                           |          | 1.15 | 0.7199 | 0.5805 | 0.9606  | 1.1075 | 1.1240 | 1.0037 |
| 3846 |                       |  | p-cresol sulfate                           | LC/MS neg       | 48460 |                        | <a href="#">HMDB11635</a> | 4615423  | 0.77 | 0.4976 | 0.6510 | 1.6391  | 1.2627 | 1.1925 | 1.4368 |
| 3853 |                       |  | o-cresol sulfate                           | LC/MS neg       | 36103 |                        |                           | 11615528 | 0.55 | 0.5561 | 0.5457 | 2.0532  | 1.1389 | 1.0499 | 0.9799 |
| 3857 |                       |  | 3-(3-hydroxyphenyl)propionate sulfate      | LC/MS neg       | 36845 |                        |                           | 187488   | 0.50 | 0.0125 | 0.1022 | 1.6244  | 0.8160 | 0.7682 | 0.7373 |
| 3860 |                       |  | 3-(3-hydroxyphenyl)propionate              | LC/MS neg       | 45415 | <a href="#">C11457</a> | <a href="#">HMDB00375</a> | 91       | 0.49 | 0.0037 | 0.0608 | 1.4436  | 0.7049 | 0.6693 | 0.5781 |
| 3862 |                       |  | 3-phenylpropionate (hydrocinnamate)        | LC/MS neg       | 36635 | <a href="#">C05629</a> | <a href="#">HMDB00764</a> | 107      | 0.55 | 0.1845 | 0.3648 | 1.1551  | 0.6327 | 0.5811 | 0.5705 |
| 3864 |                       |  | caffeine                                   | LC/MS pos early | 15749 | <a href="#">C07481</a> | <a href="#">HMDB01847</a> | 2519     | 0.25 | 0.0005 | 0.0172 | 3.1130  | 0.7918 | 0.6901 | 0.6236 |
| 3865 |                       |  | paraxanthine                               | LC/MS neg       | 569   | <a href="#">C13747</a> | <a href="#">HMDB01860</a> | 4687     | 0.45 | 0.0035 | 0.0608 | 1.8938  | 0.8554 | 0.7460 | 0.5219 |
| 3866 |                       |  | theobromine                                | LC/MS pos early | 18254 | <a href="#">C07480</a> | <a href="#">HMDB02825</a> | 5429     | 0.94 | 0.4919 | 0.5147 | 1.3736  | 1.2904 | 1.1240 | 1.2906 |
| 3867 |                       |  | theophylline                               | LC/MS pos early | 18392 | <a href="#">C07130</a> | <a href="#">HMDB01889</a> | 2183     | 0.41 | 0.0013 | 0.0319 | 2.1027  | 0.8566 | 0.7779 | 0.6898 |
| 3870 |                       |  | 1,3-dimethylurate                          | LC/MS neg       | 18394 |                        | <a href="#">HMDB01857</a> | 70346    | 0.43 | 0.0013 | 0.0319 | 1.4533  | 0.6296 | 0.5740 | 0.4030 |
| 3871 |                       |  | 1,7-dimethylurate                          | LC/MS neg       | 32391 | <a href="#">C16356</a> | <a href="#">HMDB11103</a> | 91611    | 0.40 | 0.0018 | 0.0423 | 1.6428  | 0.6579 | 0.5871 | 0.4183 |
| 3872 |                       |  | 3,7-dimethylurate                          | LC/MS neg       | 34400 | <a href="#">C16360</a> | <a href="#">HMDB01982</a> | 83126    | 1.11 | 0.9808 | 0.6459 | 1.1835  | 1.3158 | 1.1700 | 1.1147 |
| 3873 |                       |  | 1,3,7-trimethylurate                       | LC/MS neg       | 34399 | <a href="#">C16361</a> | <a href="#">HMDB02123</a> | 79437    | 0.26 | 0.0003 | 0.0118 | 1.8141  | 0.4757 | 0.4281 | 0.3360 |
| 3874 |                       |  | 1-methylxanthine                           | LC/MS neg       | 34404 | <a href="#">C16358</a> | <a href="#">HMDB10738</a> | 80220    | 0.56 | 0.0042 | 0.0613 | 1.2844  | 0.7227 | 0.6374 | 0.5189 |
| 3875 |                       |  | 3-methylxanthine                           | LC/MS neg       | 34389 | <a href="#">C16357</a> | <a href="#">HMDB01886</a> | 70639    | 0.80 | 0.1813 | 0.3626 | 1.4633  | 1.1738 | 1.0592 | 1.0348 |
| 3877 |                       |  | 5-acetylamino-6-amino-3-methyluracil       | LC/MS polar     | 32445 | <a href="#">C16366</a> | <a href="#">HMDB04400</a> | 88299    | 0.45 | 0.0085 | 0.0947 | 1.5948  | 0.7105 | 0.6458 | 0.4807 |
| 3878 |                       |  | 5-acetylamino-6-formylamino-3-methyluracil | LC/MS polar     | 34424 | <a href="#">C16365</a> | <a href="#">HMDB11105</a> | 108214   | 0.56 | 0.0391 | 0.1741 | 1.5480  | 0.8681 | 0.7863 | 0.4986 |
| 3882 |                       |  | cotinine                                   | LC/MS pos early | 34401 |                        | <a href="#">HMDB01046</a> | 854019   | 0.50 | 0.4551 | 0.5037 | 15.6961 | 7.8826 | 9.9733 | 8.8569 |
| 3883 |                       |  | hydroxycotinine                            | LC/MS pos early | 553   |                        | <a href="#">HMDB01390</a> | 10219774 | 0.21 | 0.8382 | 0.6058 | 0.3416  | 0.0722 | 0.1286 | 0.0307 |
| 3884 |                       |  | cotinine N-oxide                           | LC/MS pos early | 38661 |                        | <a href="#">HMDB01411</a> | 9815514  | 0.76 | 0.2117 | 0.3810 | 0.5369  | 0.4055 | 0.4378 | 0.3965 |
| 3892 |                       |  | norricotine                                | LC/MS pos early | 38662 |                        |                           |          | 0.74 | 0.1687 | 0.3488 | 0.4055  | 0.3002 | 0.3002 | 0.3002 |
| 3899 |                       |  | 2-piperidinone                             | LC/MS pos early | 38122 |                        | <a href="#">HMDB11749</a> | 12665    | 1.41 | 0.1133 | 0.2966 | 0.1079  | 1.4340 | 1.3401 | 1.7917 |
| 3893 |                       |  | 2,3-dihydroxyisovalerate                   | LC/MS polar     | 43400 | <a href="#">C04039</a> | <a href="#">HMDB12141</a> | 677      | 0.17 | 0.0009 | 0.0257 | 3.9591  | 0.6703 | 0.8964 | 0.5409 |
| 3991 |                       |  | 2-isopropylmalate                          | LC/MS polar     | 38276 | <a href="#">C02504</a> | <a href="#">HMDB00402</a> | 77       | 0.89 | 0.8373 | 0.6058 | 0.9789  | 0.8672 | 0.8179 | 1.2192 |
| 3992 |                       |  | 2-oxindole-3-acetate                       | LC/MS pos early | 15667 |                        | <a href="#">HMDB35514</a> | 3080590  | 1.05 | 0.1878 | 0.3668 | 0.7738  | 0.8228 | 0.8146 | 0.8657 |
| 4005 |                       |  | 3-hydroxyindolin-2-one sulfate             | LC/MS neg       | 40479 |                        |                           |          | 0.70 | 0.1901 | 0.3668 | 0.7912  | 0.5517 | 0.5222 | 0.6198 |
| 4012 |                       |  | batonicine                                 | LC/MS pos early | 48419 | <a href="#">C08269</a> | <a href="#">HMDB29412</a> | 164642   | 1.19 | 0.8502 | 0.6088 | 0.9329  | 1.1141 | 1.0873 | 1.5544 |
| 4017 |                       |  | gluconate                                  | LC/MS polar     | 38100 | <a href="#">C00257</a> | <a href="#">HMDB00625</a> | 10690    | 0.92 | 0.9699 | 0.6502 | 1.1884  | 1.0967 | 1.0620 | 1.0042 |
| 4027 |                       |  | alliin                                     | LC/MS pos early | 587   | <a href="#">C08265</a> | <a href="#">HMDB33592</a> | 87310    | 0.48 | 0.0611 | 0.2255 | 2.2833  | 1.0869 | 0.9770 | 0.9844 |
| 4028 |                       |  | N-acetyllaiiin                             | LC/MS neg       | 41494 |                        |                           |          | 0.47 | 0.1247 | 0.3126 | 1.5707  | 0.7313 | 0.6769 | 0.6579 |
| 4061 |                       |  | cinnamoylglycine                           | LC/MS neg       | 45404 |                        | <a href="#">HMDB11621</a> | 706625   | 1.09 | 0.9573 | 0.6388 | 1.6304  | 1.7787 | 1.5402 | 1.6458 |
| 4086 |                       |  | dihydroferulate                            | LC/MS neg       | 38637 |                        |                           | 14340    | 1.42 | 0.6345 | 0.5682 | 1.4374  | 2.0462 | 1.9803 | 1.0810 |
| 4094 |                       |  | equol glucuronide                          | LC/MS neg       | 40481 |                        |                           |          | 0.77 | 0.1136 | 0.2966 | 0.6423  | 0.4920 | 0.4271 | 0.8325 |

|      |                  |  |                                           |                 |       |                                               |                           |          |      |        |        |        |        |        |        |
|------|------------------|--|-------------------------------------------|-----------------|-------|-----------------------------------------------|---------------------------|----------|------|--------|--------|--------|--------|--------|--------|
| 4095 |                  |  | equol sulfate                             | LC/MS neg       | 41948 |                                               |                           |          | 0.65 | 0.1112 | 0.2947 | 0.8961 | 0.5846 | 0.4964 | 1.0538 |
| 4096 |                  |  | ergothioneine                             | LC/MS pos early | 40478 | <a href="#">C05570</a>                        | <a href="#">HMDB03045</a> | 3032311  | 0.63 | 0.0828 | 0.2612 | 1.3650 | 0.8571 | 0.9232 | 0.7960 |
| 4098 |                  |  | erythritol                                | LC/MS polar     | 37489 | <a href="#">C00503</a>                        | <a href="#">HMDB02994</a> | 222285   | 0.74 | 0.3177 | 0.4524 | 1.4840 | 1.0996 | 1.0611 | 0.9951 |
| 4103 |                  |  | ferulic acid 4-sulfate                    | LC/MS neg       | 20699 |                                               | <a href="#">HMDB29200</a> | 6305674  | 0.88 | 0.4391 | 0.4983 | 1.3996 | 1.2386 | 1.1463 | 0.5024 |
| 4110 |                  |  | glycyrrhizinate                           | LC/MS neg       | 47114 | <a href="#">C02283</a>                        | <a href="#">HMDB11628</a> | 18526330 | 0.85 | 0.1995 | 0.3735 | 0.6923 | 0.5902 | 0.5902 | 0.5902 |
| 4125 |                  |  | homostachydrine*                          | LC/MS pos early | 39789 | <a href="#">C08283</a>                        | <a href="#">HMDB33433</a> | 441447   | 0.80 | 0.2934 | 0.4392 | 1.1751 | 0.9381 | 0.9394 | 1.2653 |
| 4128 |                  |  | indolin-2-one                             | LC/MS pos early | 33009 | <a href="#">C12312</a>                        |                           | 321710   | 1.06 | 0.5434 | 0.5403 | 0.9610 | 1.0166 | 0.9524 | 1.0872 |
| 4151 |                  |  | methyl indole-3-acetate                   | LC/MS pos early | 43374 |                                               | <a href="#">HMDB29738</a> | 74706    | 0.70 | 0.0181 | 0.1199 | 1.3542 | 0.9485 | 0.8520 | 1.2052 |
| 4154 |                  |  | N-(2-furoryl)glycine                      | LC/MS neg       | 1584  |                                               | <a href="#">HMDB00439</a> | 21863    | 0.37 | 0.0112 | 0.0967 | 2.6460 | 0.9734 | 0.9324 | 0.8288 |
| 4159 |                  |  | naringenin 7-glucuronide                  | LC/MS neg       | 31536 |                                               |                           |          | 1.90 | 0.3854 | 0.4749 | 0.4594 | 0.8744 | 0.7449 | 0.3910 |
| 4183 |                  |  | pipерine                                  | LC/MS pos late  | 54924 | <a href="#">C03882</a>                        | <a href="#">HMDB29377</a> | 628024   | 0.94 | 0.3573 | 0.4591 | 1.6832 | 1.5759 | 1.4623 | 2.1093 |
| 4212 |                  |  | quinale                                   | LC/MS polar     | 33935 | <a href="#">C00296</a>                        | <a href="#">HMDB03072</a> | 6508     | 0.30 | 0.0012 | 0.0319 | 3.7205 | 1.1156 | 0.9456 | 0.4748 |
| 4219 |                  |  | acesulfame                                | LC/MS neg       | 18335 |                                               | <a href="#">HMDB33585</a> | 36573    | 2.44 | 0.3216 | 0.4524 | 1.3081 | 3.1938 | 2.7464 | 4.2246 |
| 4220 |                  |  | S-allylcysteine                           | LC/MS pos early | 48569 |                                               | <a href="#">HMDB34323</a> | 98280    | 0.45 | 0.1029 | 0.2856 | 1.5842 | 0.7162 | 0.6563 | 0.9800 |
| 4237 |                  |  | stachydrine                               | LC/MS pos early | 43239 | <a href="#">C10172</a>                        | <a href="#">HMDB04827</a> | 115244   | 1.97 | 0.1370 | 0.3283 | 1.0642 | 2.0996 | 1.8623 | 1.7149 |
| 4245 | Xenobiotics      |  | tartrate                                  | LC/MS neg       | 34384 | <a href="#">C00898</a>                        | <a href="#">HMDB00956</a> | 444305   | 0.60 | 0.9744 | 0.6446 | 1.7889 | 1.0701 | 1.0792 | 0.8358 |
| 4246 |                  |  | theanine                                  | LC/MS pos early | 15336 | <a href="#">C01047</a>                        | <a href="#">HMDB34365</a> | 439378   | 1.55 | 0.7017 | 0.5845 | 0.8367 | 1.2955 | 1.2014 | 1.2767 |
| 4249 |                  |  | thymol sulfate                            | LC/MS neg       | 22206 | <a href="#">C09908</a>                        | <a href="#">HMDB01878</a> |          | 2.13 | 0.2059 | 0.3788 | 1.8408 | 3.9201 | 8.3777 | 0.3305 |
| 4261 |                  |  | 4-allylphenol sulfate                     | LC/MS neg       | 36095 |                                               |                           |          | 1.84 | 0.6211 | 0.5637 | 1.8675 | 3.4427 | 3.0816 | 4.7984 |
| 4262 |                  |  | methyl glucopyranoside (alpha + beta)     | LC/MS neg       | 37181 |                                               |                           |          | 1.61 | 0.1836 | 0.3646 | 0.8992 | 1.4461 | 1.3603 | 0.8488 |
| 4289 |                  |  | 4-vinylgalaic acid sulfate                | LC/MS neg       | 46144 |                                               |                           |          | 0.16 | 0.0404 | 0.1783 | 4.3193 | 0.6822 | 0.6350 | 0.6428 |
| 4290 |                  |  | pyrrolidine                               | LC/MS neg       | 48442 |                                               | <a href="#">HMDB33143</a> | 122228   | 0.76 | 0.5984 | 0.5478 | 1.3860 | 1.0554 | 1.0140 | 0.8360 |
| 4293 |                  |  | daidzein sulfate (2)                      | LC/MS neg       | 48428 |                                               |                           |          | 0.63 | 0.2275 | 0.3948 | 2.0940 | 1.3132 | 1.1760 | 1.7751 |
| 4295 |                  |  | eugeniol sulfate                          | LC/MS neg       | 48728 |                                               |                           | 180632   | 0.14 | 0.0122 | 0.1013 | 3.9636 | 0.5588 | 0.9816 | 0.7254 |
| 4299 |                  |  | 2-keto-3-deoxy-gluconate                  | LC/MS polar     | 48715 | <a href="#">C00204</a>                        | <a href="#">HMDB01353</a> | 161227   | 1.07 | 0.9406 | 0.6350 | 1.0314 | 1.1012 | 1.0630 | 0.8811 |
| 4301 |                  |  | isoeugenol sulfate                        | LC/MS neg       | 48141 |                                               |                           |          | 0.74 | 0.5701 | 0.5478 | 0.7860 | 0.5706 | 0.6019 | 0.6168 |
| 4322 |                  |  | 3,4-methylenediphenylate                  | LC/MS neg       | 48987 |                                               |                           |          | 1.46 | 0.4714 | 0.5067 | 0.9600 | 1.3974 | 1.3181 | 1.1893 |
| 4375 |                  |  | caffeic acid sulfate                      | LC/MS polar     | 53026 |                                               | <a href="#">HMDB41708</a> |          | 0.31 | 0.0023 | 0.0540 | 2.4962 | 0.7762 | 0.7653 | 0.4305 |
| 4379 |                  |  | tartronate (hydroxymalonate)              | LC/MS neg       | 53254 | <a href="#">C02287</a>                        | <a href="#">HMDB35227</a> | 45       | 1.31 | 0.0038 | 0.0608 | 0.9499 | 1.2414 | 1.2004 | 1.1060 |
| 4412 | Bacterial/Fungal |  | N-methylpiperidate                        | LC/MS pos early | 20693 |                                               |                           | 11286529 | 0.81 | 0.2050 | 0.3788 | 0.9276 | 0.7533 | 0.7224 | 0.6410 |
| 4436 |                  |  | 4-acetamidophenol                         | LC/MS neg       | 47101 | <a href="#">C06804</a>                        | <a href="#">HMDB01859</a> | 1983     | 0.28 | 0.3306 | 0.4524 | 0.1404 | 0.0393 | 0.0393 | 0.0393 |
| 4437 |                  |  | 3-(N-acetyl-L-cystein-S-yl) acetaminophen | LC/MS neg       | 12032 |                                               |                           | 83967    | 1.00 |        |        | 1.0000 | 1.0000 | 1.0000 | 1.0000 |
| 4438 |                  |  | 4-acetaminophen sulfate                   | LC/MS neg       | 45721 | <a href="#">C06804</a>                        | <a href="#">HMDB59911</a> | 83939    | 0.02 | 0.1681 | 0.3488 | 2.3665 | 0.0456 | 0.0456 | 0.0456 |
| 4439 |                  |  | 4-acetamidophenylglucuronide              | LC/MS neg       | 37475 |                                               | <a href="#">HMDB10316</a> | 83944    | 0.43 | 0.3306 | 0.4524 | 0.1715 | 0.0741 | 0.0741 | 0.0741 |
| 4440 |                  |  | 2-hydroxyacetaminophen sulfate*           | LC/MS neg       | 15736 |                                               |                           | 86290013 | 0.52 | 0.3306 | 0.4524 | 0.1971 | 0.1026 | 0.1026 | 0.1026 |
| 4441 |                  |  | 2-methoxyacetaminophen sulfate*           | LC/MS neg       | 33173 |                                               |                           | 86290014 | 1.00 |        |        | 1.0000 | 1.0000 | 1.0000 | 1.0000 |
| 4442 |                  |  | 2-methoxyacetaminophen glucuronide*       | LC/MS neg       | 47031 |                                               |                           | 14367271 | 1.00 |        |        | 1.0000 | 1.0000 | 1.0000 | 1.0000 |
| 4443 |                  |  | 3-(cystein-S-yl)acetaminophen*            | LC/MS pos early | 33161 |                                               |                           | 5233914  | 1.00 |        |        | 1.0000 | 1.0000 | 1.0000 | 1.0000 |
| 4463 |                  |  | salicylic acid glucuronide*               | LC/MS neg       | 34365 |                                               |                           |          | 0.31 | 0.0656 | 0.2333 | 1.7490 | 0.5371 | 0.7837 | 0.4252 |
| 4477 |                  |  | lidocaine                                 | LC/MS pos late  | 33384 | <a href="#">D00358</a>                        | <a href="#">HMDB14426</a> | 3676     | 1.00 |        |        | 1.0000 | 1.0000 | 1.0000 | 1.0000 |
| 4478 |                  |  | N-ethylglycinexylidide                    | LC/MS pos early | 35661 | <a href="#">C16561</a>                        | <a href="#">HMDB60656</a> | 24415    | 1.00 |        |        | 1.0000 | 1.0000 | 1.0000 | 1.0000 |
| 4519 |                  |  | flloxacin                                 | LC/MS neg       | 33080 | <a href="#">C07321</a>                        | <a href="#">HMDB01929</a> | 4583     | 0.02 | 0.3306 | 0.4524 | 0.1070 | 0.0019 | 0.0019 | 0.0019 |
| 4601 |                  |  | metoprolol                                | LC/MS pos early | 21320 | <a href="#">D02358</a>                        | <a href="#">HMDB01932</a> | 4171     | 1.00 |        |        | 1.0000 | 1.0000 | 1.0000 | 1.0000 |
| 4602 |                  |  | metoprolol acid mesilate*                 | LC/MS pos early | 19037 |                                               |                           | 62936    | 0.01 | 0.3306 | 0.4524 | 0.1063 | 0.0012 | 0.0012 | 0.0012 |
| 4603 |                  |  | alpha-hydroxymetoprolol                   | LC/MS pos early | 34109 |                                               | <a href="#">HMDB60994</a> | 114962   | 1.00 |        |        | 1.0000 | 1.0000 | 1.0000 | 1.0000 |
| 4617 |                  |  | warfarin                                  | LC/MS neg       | 54738 | <a href="#">C01541</a>                        | <a href="#">HMDB01935</a> |          | 0.00 | 0.3306 | 0.4524 | 0.1057 | 0.0004 | 0.0004 | 0.0004 |
| 4619 |                  |  | hydrochlorothiazide                       | LC/MS neg       | 43335 | <a href="#">C07041</a>                        | <a href="#">HMDB01928</a> | 3639     | 1.00 |        |        | 1.0000 | 1.0000 | 1.0000 | 1.0000 |
| 4624 |                  |  | candesartan                               | LC/MS neg       | 39625 | <a href="#">D00522</a> <a href="#">C07468</a> | <a href="#">HMDB14934</a> | 2541     | 1.23 | 0.3343 | 0.4524 | 0.3838 | 0.4486 | 0.4345 | 0.3638 |
| 4625 |                  |  | valsartan                                 | LC/MS neg       | 54749 |                                               |                           | 5650     | 8.27 | 0.7499 | 0.5938 | 0.0535 | 0.4424 | 0.3688 | 0.8287 |
| 4626 |                  |  | lmesartan                                 | LC/MS neg       | 48566 | <a href="#">D05246</a>                        | <a href="#">HMDB14420</a> | 158781   | 0.46 | 0.1630 | 0.3488 | 0.1920 | 0.0892 | 0.0892 | 0.0892 |
| 4627 |                  |  | enalapril                                 | LC/MS pos late  | 53256 |                                               |                           | 3222     | 1.00 |        |        | 1.0000 | 1.0000 | 1.0000 | 1.0000 |
| 4642 |                  |  | famotidine                                | LC/MS pos early | 52949 | <a href="#">D00318</a>                        | <a href="#">HMDB01919</a> | 5702160  | 1.00 |        |        | 1.0000 | 1.0000 | 1.0000 | 1.0000 |
| 4644 |                  |  | omeprazole                                | LC/MS neg       | 42613 | <a href="#">C07324</a>                        | <a href="#">HMDB01913</a> | 4594     | 1.00 |        |        | 1.0000 | 1.0000 | 1.0000 | 1.0000 |
| 4652 |                  |  | metformin                                 | LC/MS pos early | 38600 | <a href="#">C07151</a>                        | <a href="#">HMDB01921</a> | 4091     | 0.84 | 0.3306 | 0.4524 | 0.4232 | 0.3553 | 0.3553 | 0.3553 |

|      |                       |                                 |                 |       |                        |                           |        |      |        |        |        |        |        |        |  |  |  |
|------|-----------------------|---------------------------------|-----------------|-------|------------------------|---------------------------|--------|------|--------|--------|--------|--------|--------|--------|--|--|--|
| 4665 |                       |                                 |                 |       |                        |                           |        |      |        |        |        |        |        |        |  |  |  |
| 4674 | Drug - Metabolic      | rosuvastatin                    | LC/MS neg       | 38306 | <a href="#">D01915</a> | <a href="#">HMDB15230</a> | 446157 | 0.74 | 0.7227 | 0.5965 | 0.5043 | 0.3742 | 0.3668 | 0.3295 |  |  |  |
| 4675 |                       | allopurinol riboside            | LC/MS neg       | 40421 |                        |                           |        | 1.00 |        |        | 1.0000 | 1.0000 | 1.0000 | 1.0000 |  |  |  |
| 4695 |                       | azypurinol                      | LC/MS polar     | 38321 | <a href="#">D02365</a> | <a href="#">HMDB00786</a> | 4644   | 1.00 |        |        | 1.0000 | 1.0000 | 1.0000 | 1.0000 |  |  |  |
| 4734 | Drug - Neurological   | lanotrigine                     | LC/MS pos early | 41726 | <a href="#">D00354</a> | HMDB14695 HMDB05043       | 3878   | 1.00 |        |        | 1.0000 | 1.0000 | 1.0000 | 1.0000 |  |  |  |
| 4745 |                       | fluroxetine                     | LC/MS pos late  | 54762 |                        |                           | 60836  | 1.00 |        |        | 1.0000 | 1.0000 | 1.0000 | 1.0000 |  |  |  |
| 4757 | Drug - Psychoactive   | quetiapine                      | LC/MS pos late  | 40450 | <a href="#">C07397</a> | <a href="#">HMDB05021</a> | 5002   | 1.00 |        |        | 1.0000 | 1.0000 | 1.0000 | 1.0000 |  |  |  |
| 4772 | Drug - Respiratory    | diphenhydramine                 | LC/MS pos late  | 39787 | <a href="#">C06960</a> | <a href="#">HMDB01927</a> | 3100   | 1.00 |        |        | 1.0000 | 1.0000 | 1.0000 | 1.0000 |  |  |  |
| 4776 |                       | salicylate                      | LC/MS neg       | 38669 | <a href="#">C00805</a> | <a href="#">HMDB01895</a> | 338    | 0.39 | 0.4263 | 0.4933 | 3.6577 | 1.4316 | 1.6402 | 1.1371 |  |  |  |
| 4799 | Drug - Topical Agents | hydroquinone sulfate            | LC/MS neg       | 1515  | <a href="#">C00530</a> | <a href="#">HMDB02434</a> | 161220 | 1.06 | 0.7613 | 0.5968 | 1.5209 | 1.6075 | 1.5181 | 1.3403 |  |  |  |
| 4841 | Drug - Other          | S-carboxymethyl-L-cysteine      | LC/MS pos early | 35322 | <a href="#">C03727</a> | <a href="#">HMDB29415</a> | 1080   | 0.10 | 0.0041 | 0.0613 | 5.6965 | 0.5632 | 0.6145 | 0.5167 |  |  |  |
| 4848 |                       | diglycerol sulfate*             | LC/MS neg       | 40700 | <a href="#">C00059</a> | <a href="#">HMDB01448</a> | 1118   | 0.93 | 0.3423 | 0.4524 | 1.0635 | 0.9875 | 0.9768 | 0.9300 |  |  |  |
| 4851 |                       | D-sulfo-L-tyrosine              | LC/MS neg       | 46960 |                        |                           | 514196 | 0.91 | 0.4881 | 0.5132 | 1.1253 | 1.0295 | 1.0189 | 0.9808 |  |  |  |
| 4855 |                       | ethyl glucuronide               | LC/MS neg       | 45413 |                        | <a href="#">HMDB10325</a> | 152226 | 0.09 | 0.0155 | 0.1152 | 3.8273 | 0.3540 | 0.3855 | 0.3508 |  |  |  |
| 4867 |                       | 3-acetylphenol sulfate          | LC/MS neg       | 39603 |                        |                           |        | 0.48 | 0.0067 | 0.0791 | 1.0263 | 0.4950 | 0.4775 | 0.4659 |  |  |  |
| 4869 |                       | 2-aminophenol sulfate           | LC/MS neg       | 48693 |                        | <a href="#">HMDB61116</a> | 181670 | 0.53 | 0.0296 | 0.1494 | 2.0453 | 1.0743 | 1.0142 | 0.6782 |  |  |  |
| 4913 |                       | dimethyl sulfone                | LC/MS pos early | 43286 | <a href="#">C11142</a> | <a href="#">HMDB04983</a> | 6213   | 1.40 | 0.1091 | 0.2904 | 1.1653 | 1.6347 | 1.5325 | 2.0566 |  |  |  |
| 4915 |                       | ectoine                         | LC/MS pos early | 43424 | <a href="#">C06231</a> |                           | 126041 | 1.15 | 0.5135 | 0.5251 | 1.8424 | 2.1275 | 1.8428 | 2.9503 |  |  |  |
| 4946 | Chemical              | perfluorooctanesulfonate (PFOS) | LC/MS polar     | 35651 | <a href="#">C18142</a> | <a href="#">HMDB59586</a> | 74483  | 1.15 | 0.3949 | 0.4798 | 1.0274 | 1.1837 | 1.1450 | 1.0713 |  |  |  |
| 4955 |                       | succinimide                     | LC/MS polar     | 57564 | <a href="#">C07273</a> |                           | 11439  | 0.85 | 0.4851 | 0.5126 | 1.2888 | 1.0943 | 1.0432 | 0.9301 |  |  |  |
| 4966 |                       | 4-hydroxychlorothalonil         | LC/MS neg       | 41888 |                        |                           | 34217  | 1.13 | 0.6044 | 0.5637 | 1.2067 | 1.3648 | 1.2988 | 1.2384 |  |  |  |
| 4970 |                       | 1,2,3-benzenetriol sulfate (2)  | LC/MS neg       | 49441 |                        |                           |        | 1.81 | 0.7858 | 0.6012 | 0.8525 | 1.5392 | 1.6062 | 1.3206 |  |  |  |
| 4972 |                       | 2-methoxyresorcinol sulfate     | LC/MS neg       | 49762 |                        |                           |        | 2.10 | 0.1713 | 0.3505 | 0.4923 | 1.0357 | 0.9521 | 1.1374 |  |  |  |
| 4973 |                       | 3-hydroxypyridine sulfate       | LC/MS neg       | 49445 |                        |                           |        | 0.27 | 0.0002 | 0.0078 | 2.5205 | 0.6827 | 0.6042 | 0.6278 |  |  |  |
| 4974 |                       | 1,2,3-benzenetriol sulfate (1)  | LC/MS neg       | 48448 |                        |                           |        | 3.53 | 0.0069 | 0.0791 | 0.4124 | 1.4576 | 1.5911 | 1.1603 |  |  |  |
| 4983 |                       | 6-hydroxyindole sulfate         | LC/MS neg       | 48761 |                        |                           |        | 0.96 | 0.8015 | 0.6038 | 1.2551 | 1.2055 | 1.1572 | 1.2585 |  |  |  |
| 4987 |                       | thioprotine                     | LC/MS pos early | 48698 |                        |                           | 93176  | 1.01 | 0.7806 | 0.5968 | 1.0031 | 1.0175 | 1.0019 | 1.0185 |  |  |  |
